# Supplementary material for: ASIC1a is required for neuronal activation via low-intensity ultrasound stimulation in mouse brain
Source: eLife. 2021 Sep 27;10:e61660. doi: 10.7554/eLife.61660 (PMC8510583; doi:10.7554/eLife.61660)
Supplement: Figure 1—source data 1. [file elife-61660-fig1-data1.xlsx]

## Sheet: 工作表1
	Total cell count of p-ERK positive staining cells in the indicated brain regions (each number is collected from the brain slices of one mouse)
		Cortex							Hippocampus							Amygdala
		Wildtype	Wildtype						Wildtype	Wildtype						Wildtype	Wildtype
		Control	Ultrasound						Control	Ultrasound						Control	Ultrasound
		23	123						50	79						149	955
		26	119						26	57						431	511
		37	61						25	64						285	777
		18	154						37	39						273	820
		32	130						47	148						295	500
	Average	27.2	117.4						37	77.4						286.6	712.6
	Stdev	7.46324	34.3264						11.5542	42.0036						100.054	200.176
