# Supplementary material for: ASIC1a is required for neuronal activation via low-intensity ultrasound stimulation in mouse brain
Source: eLife. 2021 Sep 27;10:e61660. doi: 10.7554/eLife.61660 (PMC8510583; doi:10.7554/eLife.61660)
Supplement: Figure 2—source data 3. [file elife-61660-fig2-data3.xlsx]

## Sheet: Control graph
Time	Average	Stdev																	Time	Control	Amiloride	Control Stdev	Stdev
0.5	0	0																	0.5	0	0	0	0
1	-0.0416667	0.414578																	1	-0.0416667	0.0782828	0.414578	0.0910142
1.5	0.145833	0.290922																	1.5	0.145833	0.0539452	0.290922	0.11986
2	0.270833	0.469097																	2	0.270833	0.0533231	0.469097	0.169505
2.5	0.270833	0.180422																	2.5	0.270833	0.122127	0.180422	0.144763
3	0.270833	0.180422																	3	0.270833	0.0472844	0.180422	0.10146
3.5	0.1875	0.480072																	3.5	0.1875	-0.00742937	0.480072	0.096893
4	0.229167	0.369755																	4	0.229167	0.0169082	0.369755	0.0572112
4.5	0.291667	0.29756																	4.5	0.291667	-0.0394159	0.29756	0.108109
5	0.0625	0.272431																	5	0.0625	0.0396355	0.272431	0.0636722
5.5	-0.0416667	0.462106																	5.5	-0.0416667	-0.0486752	0.462106	0.0956937
6	0.208333	0.544862																	6	0.208333	0.00603865	0.544862	0.0702874
6.5	0.0208333	0.32476																	6.5	0.0208333	-0.0410262	0.32476	0.127756
7	0.416667	0.433013																	7	0.416667	-0.0394159	0.433013	0.108109
7.5	0.25	0.433013																	7.5	0.25	-0.0627653	0.433013	0.14706
8	0.0833333	0.144338																	8	0.0833333	-0.0394159	0.144338	0.108109
8.5	-0.208333	0.216506																	8.5	-0.208333	-0.0915313	0.216506	0.12171
9	0.0416667	0.29756																	9	0.0416667	-0.0579344	0.29756	0.0845066
9.5	0.125	0.544862																	9.5	0.125	-0.11005	0.544862	0.105263
10	0.291667	0.71078																	10	0.291667	-0.140426	0.71078	0.135334
10.5	0.125	0.544862																	10.5	0.125	-0.139438	0.544862	0.0989949
11	-0.0833333	0.381881																	11	-0.0833333	-0.141048	0.381881	0.109027
11.5	2.77083	3.05015																	11.5	2.77083	-0.11327	3.05015	0.133875
12	9.45833	2.12255																	12	9.45833	-0.00644122	2.12255	0.114048
12.5	12.2292	2.2526																	12.5	12.2292	0.170034	2.2526	0.176575
13	13.7083	2.12255																	13	13.7083	0.56551	2.12255	0.324926
13.5	15.4792	2.81389																	13.5	15.4792	0.892951	2.81389	0.694978
14	15.25	2.38485																	14	15.25	1.64035	2.38485	1.95436
14.5	15.4167	1.95256																	14.5	15.4167	1.11096	1.95256	1.11758
15	15	2.57391																	15	15	0.626043	2.57391	0.326863
15.5	15.3125	2.01071																	15.5	15.3125	0.81712	2.01071	0.706215
16	14.2083	1.98037																	16	14.2083	0.779461	1.98037	0.742722
16.5	13.6667	2.49165																	16.5	13.6667	0.507356	2.49165	0.312856
17	13.4167	1.78536																	17	13.4167	0.541941	1.78536	0.329867
17.5	13.0625	2.18214																	17.5	13.0625	0.457839	2.18214	0.346823
18	12.6042	2.57214																	18	12.6042	0.566279	2.57214	0.327579
18.5	12.3958	2.01847																	18.5	12.3958	0.191773	2.01847	0.158757
19	12.1042	2.64797																	19	12.1042	0.356061	2.64797	0.391235
19.5	11.4167	1.95256																	19.5	11.4167	0.18771	1.95256	0.195871
20	11.1667	1.71998																	20	11.1667	0.172632	1.71998	0.194993
20.5	11.2708	2.30291																	20.5	11.2708	0.172632	2.30291	0.194993
21	10.6875	1.61415																	21	10.6875	0.0782828	1.61415	0.0910142
21.5	10.5208	1.95822																	21.5	10.5208	0.0993998	1.95822	0.125142
22	9.91667	1.65202																	22	9.91667	0.176841	1.65202	0.206883
22.5	9.52083	1.50043																	22.5	9.52083	0.0472844	1.50043	0.10146
23	9.27083	1.73543																	23	9.27083	0.0287659	1.73543	0.0788379
23.5	8.95833	1.75742																	23.5	8.95833	0.0514932	1.75742	0.102906
24	9.10417	2.0133																	24	9.10417	0.0834797	2.0133	0.137853
24.5	8.95833	2.08292																	24.5	8.95833	0.0287659	2.08292	0.0788379
25	8.4375	1.71733																	25	8.4375	-0.00322061	1.71733	0.0570239
25.5	7.6875	1.65241																	25.5	7.6875	-0.00139072	1.65241	0.162571
26	7.5625	1.12326																	26	7.5625	0.101998	1.12326	0.149758
26.5	7.72917	0.308305																	26.5	7.72917	-0.0408798	0.308305	0.112039
27	6.95833	1.12036																	27	6.95833	-0.0309984	1.12036	0.0356706
27.5	6.9375	1.37358																	27.5	6.9375	-0.0595447	1.37358	0.101705
28	6.9375	1.5039																	28	6.9375	-0.0662055	1.5039	0.0724181
28.5	6.375	0.960143																	28.5	6.375	-0.0821256	0.960143	0.0903136
29	6	0.790569																	29	6	-0.116711	0.790569	0.072739
29.5	6.1875	0.958107																	29.5	6.1875	-0.0619968	0.958107	0.0713413
30	5.5625	1.35064																	30	5.5625	-0.0847241	1.35064	0.0618153
30.5	6.33333	0.790569																	30.5	6.33333	-0.118321	0.790569	0.0863199
31	5.64583	1.25882																	31	5.64583	-0.0998024	1.25882	0.100592
31.5	5.4375	1.20384																	31.5	5.4375	-0.164398	1.20384	0.148853
32	5.72917	0.810896																	32	5.72917	-0.112502	0.810896	0.0744599
32.5	5.10417	1.06617																	32.5	5.10417	-0.213292	1.06617	0.138905
33	4.75	0.829156																	33	4.75	-0.157956	0.829156	0.0988921
33.5	4.4375	1.03645																	33.5	4.4375	-0.242058	1.03645	0.163778
34	4.45833	0.844714																	34	4.45833	-0.199824	0.844714	0.119029
34.5	4.29167	0.71078																	34.5	4.29167	-0.209084	0.71078	0.121819
35	4.10417	0.531556																	35	4.10417	-0.242058	0.531556	0.163778
35.5	4.27083	0.531556																	35.5	4.27083	-0.222552	0.531556	0.137954
36	4.35417	0.40984																	36	4.35417	-0.245279	0.40984	0.164298
36.5	4.75	1.14564																	36.5	4.75	-0.213292	1.14564	0.138905
37	3.875	1.02317																	37	3.875	-0.245279	1.02317	0.164298
37.5	3.47917	0.791392																	37.5	3.47917	-0.218343	0.791392	0.126595
38	3.29167	0.793857																	38	3.29167	-0.222918	0.793857	0.208284
38.5	3.5625	1.12326																	38.5	3.5625	-0.24268	1.12326	0.145649
39	3.89583	0.743899																	39	3.89583	-0.353938	0.743899	0.245349
39.5	3.75	0.559017																	39.5	3.75	-0.341092	0.559017	0.202001
40	3.79167	1.10161																	40	3.79167	-0.273057	1.10161	0.167415
40.5	2.75	2.70416																	40.5	2.75	-0.295784	2.70416	0.194491

## Sheet: GsMTx
				Time						Average	Stdev	Time	Average	Stdev															Time	Control	GsMTx-4	Control Stdev	GsMTx-4 Stdev
				0.5		1	0	0	0	0.25	0.433013	0.5	0.25	0.433013															0.5	0	0.25	0	0.433013
				1		0	0	0.666667	0	0.166667	0.288675	1	0.166667	0.288675															1	-0.0416667	0.166667	0.414578	0.288675
				1.5		0	0	0.666667	0	0.166667	0.288675	1.5	0.166667	0.288675															1.5	0.145833	0.166667	0.290922	0.288675
				2		0	0	0.666667	0	0.166667	0.288675	2	0.166667	0.288675															2	0.270833	0.166667	0.469097	0.288675
				2.5		0	0	0	0.333333	0.0833333	0.144338	2.5	0.0833333	0.144338															2.5	0.270833	0.0833333	0.180422	0.144338
				3		0	-0.5	0	-0.333333	-0.208333	0.216506	3	-0.208333	0.216506															3	0.270833	-0.208333	0.180422	0.216506
				3.5		0	0	0.333333	0	0.0833333	0.144338	3.5	0.0833333	0.144338															3.5	0.1875	0.0833333	0.480072	0.144338
				4		0	0	0.333333	0	0.0833333	0.144338	4	0.0833333	0.144338															4	0.229167	0.0833333	0.369755	0.144338
				4.5		0	-0.5	0.333333	-0.333333	-0.125	0.320048	4.5	-0.125	0.320048															4.5	0.291667	-0.125	0.29756	0.320048
				5		0	0	0	0	0	0	5	0	0															5	0.0625	0	0.272431	0
				5.5		0	0	0	-0.333333	-0.0833333	0.144338	5.5	-0.0833333	0.144338															5.5	-0.0416667	-0.0833333	0.462106	0.144338
				6		0	-0.5	0	0	-0.125	0.216506	6	-0.125	0.216506															6	0.208333	-0.125	0.544862	0.216506
				6.5		0	0	0	-0.333333	-0.0833333	0.144338	6.5	-0.0833333	0.144338															6.5	0.0208333	-0.0833333	0.32476	0.144338
				7		0	-0.5	0	0	-0.125	0.216506	7	-0.125	0.216506															7	0.416667	-0.125	0.433013	0.216506
				7.5		0	-0.5	1.33333	0	0.208333	0.680839	7.5	0.208333	0.680839															7.5	0.25	0.208333	0.433013	0.680839
				8		0	0	0	-0.333333	-0.0833333	0.144338	8	-0.0833333	0.144338															8	0.0833333	-0.0833333	0.144338	0.144338
				8.5		0	-0.5	0.333333	-0.666667	-0.208333	0.397475	8.5	-0.208333	0.397475															8.5	-0.208333	-0.208333	0.216506	0.397475
				9		0	-0.5	0	-0.333333	-0.208333	0.216506	9	-0.208333	0.216506															9	0.0416667	-0.208333	0.29756	0.216506
				9.5		0	0	0	-0.333333	-0.0833333	0.144338	9.5	-0.0833333	0.144338															9.5	0.125	-0.0833333	0.544862	0.144338
				10		0	-0.5	-0.333333	0	-0.208333	0.216506	10	-0.208333	0.216506															10	0.291667	-0.208333	0.71078	0.216506
				10.5		0	-0.5	1	-0.333333	0.0416667	0.581843	10.5	0.0416667	0.581843															10.5	0.125	0.0416667	0.544862	0.581843
				11		0	-0.5	-0.666667	-0.666667	-0.458333	0.273227	11	-0.458333	0.273227															11	-0.0833333	-0.458333	0.381881	0.273227
				11.5		12	6	5	1	6	3.937	11.5	6	3.937															11.5	2.77083	6	3.05015	3.937
				12		18	9.5	7.66667	7	10.5417	4.4023	12	10.5417	4.4023															12	9.45833	10.5417	2.12255	4.4023
				12.5		21	10	6.66667	8	11.4167	5.6587	12.5	11.4167	5.6587															12.5	12.2292	11.4167	2.2526	5.6587
				13		20	10.5	5.33333	6	10.4583	5.85635	13	10.4583	5.85635															13	13.7083	10.4583	2.12255	5.85635
				13.5		21	10.5	9.33333	6	11.7083	5.61295	13.5	11.7083	5.61295															13.5	15.4792	11.7083	2.81389	5.61295
				14		22	12	6.66667	6.66667	11.8333	6.26055	14	11.8333	6.26055															14	15.25	11.8333	2.38485	6.26055
				14.5		23	10.5	6	6.33333	11.4583	6.89542	14.5	11.4583	6.89542															14.5	15.4167	11.4583	1.95256	6.89542
				15		21	10.5	6.33333	6.33333	11.0417	5.9958	15	11.0417	5.9958															15	15	11.0417	2.57391	5.9958
				15.5		20	10	6.33333	6	10.5833	5.6587	15.5	10.5833	5.6587															15.5	15.3125	10.5833	2.01071	5.6587
				16		21	9.5	6.33333	6.33333	10.7917	6.0339	16	10.7917	6.0339															16	14.2083	10.7917	1.98037	6.0339
				16.5		18	9.5	6.33333	5.33333	9.79167	4.98243	16.5	9.79167	4.98243															16.5	13.6667	9.79167	2.49165	4.98243
				17		18	9.5	5	4.33333	9.20833	5.45101	17	9.20833	5.45101															17	13.4167	9.20833	1.78536	5.45101
				17.5		19	9	5.66667	5	9.66667	5.59762	17.5	9.66667	5.59762															17.5	13.0625	9.66667	2.18214	5.59762
				18		18	8.5	5.66667	5	9.29167	5.19665	18	9.29167	5.19665															18	12.6042	9.29167	2.57214	5.19665
				18.5		16	8.5	5	5.66667	8.79167	4.36427	18.5	8.79167	4.36427															18.5	12.3958	8.79167	2.01847	4.36427
				19		16	7	4.33333	4.66667	8	4.73169	19	8	4.73169															19	12.1042	8	2.64797	4.73169
				19.5		16	7	4.66667	4.33333	8	4.73169	19.5	8	4.73169															19.5	11.4167	8	1.95256	4.73169
				20		14	7	4.33333	3.33333	7.16667	4.16667	20	7.16667	4.16667															20	11.1667	7.16667	1.71998	4.16667
				20.5		14	6.5	4	5.33333	7.45833	3.87903	20.5	7.45833	3.87903															20.5	11.2708	7.45833	2.30291	3.87903
				21		12	7	4.33333	3.33333	6.66667	3.35824	21	6.66667	3.35824															21	10.6875	6.66667	1.61415	3.35824
				21.5		12	6.5	4.33333	4	6.70833	3.20238	21.5	6.70833	3.20238															21.5	10.5208	6.70833	1.95822	3.20238
				22		12	6	4	4	6.5	3.27872	22	6.5	3.27872															22	9.91667	6.5	1.65202	3.27872
				22.5		11	6	3.66667	2.66667	5.83333	3.21887	22.5	5.83333	3.21887															22.5	9.52083	5.83333	1.50043	3.21887
				23		12	6	3.66667	3.66667	6.33333	3.40751	23	6.33333	3.40751															23	9.27083	6.33333	1.73543	3.40751
				23.5		9	5.5	3	3	5.125	2.45904	23.5	5.125	2.45904															23.5	8.95833	5.125	1.75742	2.45904
				24		9	4.5	3.66667	3.66667	5.20833	2.2154	24	5.20833	2.2154															24	9.10417	5.20833	2.0133	2.2154
				24.5		9	5	3	3	5	2.44949	24.5	5	2.44949															24.5	8.95833	5	2.08292	2.44949
				25		9	4.5	2.33333	3	4.70833	2.59908	25	4.70833	2.59908															25	8.4375	4.70833	1.71733	2.59908
				25.5		9	4.5	2.66667	3	4.79167	2.52591	25.5	4.79167	2.52591															25.5	7.6875	4.79167	1.65241	2.52591
				26		8	4.5	2.66667	2.66667	4.45833	2.17746	26	4.45833	2.17746															26	7.5625	4.45833	1.12326	2.17746
				26.5		8	4	3	2.66667	4.41667	2.12623	26.5	4.41667	2.12623															26.5	7.72917	4.41667	0.308305	2.12623
				27		7	3	2	1.66667	3.41667	2.12623	27	3.41667	2.12623															27	6.95833	3.41667	1.12036	2.12623
				27.5		7	4	2	2	3.75	2.04634	27.5	3.75	2.04634															27.5	6.9375	3.75	1.37358	2.04634
				28		7	3.5	2.66667	2.33333	3.875	1.85358	28	3.875	1.85358															28	6.9375	3.875	1.5039	1.85358
				28.5		6	3	2.66667	2	3.41667	1.53433	28.5	3.41667	1.53433															28.5	6.375	3.41667	0.960143	1.53433
				29		7	3	2.33333	2	3.58333	2.0052	29	3.58333	2.0052															29	6	3.58333	0.790569	2.0052
				29.5		6	3	3.33333	1.66667	3.5	1.57233	29.5	3.5	1.57233															29.5	6.1875	3.5	0.958107	1.57233
				30		5	2.5	1.66667	2	2.79167	1.30902	30	2.79167	1.30902															30	5.5625	2.79167	1.35064	1.30902
				30.5		5	3	2	1.66667	2.91667	1.29904	30.5	2.91667	1.29904															30.5	6.33333	2.91667	0.790569	1.29904
				31		5	3	1.66667	1	2.66667	1.52753	31	2.66667	1.52753															31	5.64583	2.66667	1.25882	1.52753
				31.5		5	2	2	1.33333	2.58333	1.42156	31.5	2.58333	1.42156															31.5	5.4375	2.58333	1.20384	1.42156
				32		5	2	1.66667	0.666667	2.33333	1.61589	32	2.33333	1.61589															32	5.72917	2.33333	0.810896	1.61589
				32.5		4	2.5	2	1.33333	2.45833	0.981602	32.5	2.45833	0.981602															32.5	5.10417	2.45833	1.06617	0.981602
				33		3	2	1.66667	1.33333	2	0.62361	33	2	0.62361															33	4.75	2	0.829156	0.62361
				33.5		5	2	1.66667	1.33333	2.5	1.46249	33.5	2.5	1.46249															33.5	4.4375	2.5	1.03645	1.46249
				34		3	1.5	2	1	1.875	0.73951	34	1.875	0.73951															34	4.45833	1.875	0.844714	0.73951
				34.5		3	2	1.33333	1	1.83333	0.763763	34.5	1.83333	0.763763															34.5	4.29167	1.83333	0.71078	0.763763
				35		3	1.5	1	0.666667	1.54167	0.892679	35	1.54167	0.892679															35	4.10417	1.54167	0.531556	0.892679
				35.5		2	1.5	1	0.666667	1.29167	0.505181	35.5	1.29167	0.505181															35.5	4.27083	1.29167	0.531556	0.505181
				36		2	1.5	1.33333	1	1.45833	0.360844	36	1.45833	0.360844															36	4.35417	1.45833	0.40984	0.360844
				36.5		2	1.5	1	-0.333333	1.04167	0.869027	36.5	1.04167	0.869027															36.5	4.75	1.04167	1.14564	0.869027
				37		3	1.5	1	0	1.375	1.08253	37	1.375	1.08253															37	3.875	1.375	1.02317	1.08253
				37.5		2	1.5	1	0.333333	1.20833	0.61661	37.5	1.20833	0.61661															37.5	3.47917	1.20833	0.791392	0.61661
				38		2	0.5	1	1	1.125	0.544862	38	1.125	0.544862															38	3.29167	1.125	0.793857	0.544862
				38.5		2	1	1	1	1.25	0.433013	38.5	1.25	0.433013															38.5	3.5625	1.25	1.12326	0.433013
				39		2	1	1	0.666667	1.16667	0.5	39	1.16667	0.5															39	3.89583	1.16667	0.743899	0.5
				39.5		1	1	0.666667	0.666667	0.833333	0.166667	39.5	0.833333	0.166667															39.5	3.75	0.833333	0.559017	0.166667
				40		3	0.5	0.666667	0.666667	1.20833	1.03665	40	1.20833	1.03665															40	3.79167	1.20833	1.10161	1.03665
				40.5		2	0.5	0.666667	0.666667	0.958333	0.605243	40.5	0.958333	0.605243															40.5	2.75	0.958333	2.70416	0.605243
					MAX	23	12	9.33333	8	11.8333	6.89542

## Sheet: Amiloride
Time	Control	Amiloride	Control Stdev	Stdev		Amiloride					Average	Stdev	Time	Average	Stdev
0.5	0	0	0	0			0	0	0	0	0	0	0.5	0	0
1	-0.0416667	0.0782828	0.414578	0.0910142			0.0909091	0.222222	0	0	0.0782828	0.0910142	1	0.0782828	0.0910142
1.5	0.145833	0.0539452	0.290922	0.11986			0	0.259259	0	-0.0434783	0.0539452	0.11986	1.5	0.0539452	0.11986
2	0.270833	0.0533231	0.469097	0.169505			0.0909091	0.296296	0	-0.173913	0.0533231	0.169505	2	0.0533231	0.169505
2.5	0.270833	0.122127	0.180422	0.144763			0.272727	0.259259	0	-0.0434783	0.122127	0.144763	2.5	0.122127	0.144763
3	0.270833	0.0472844	0.180422	0.10146			0.0909091	0.185185	0	-0.0869565	0.0472844	0.10146	3	0.0472844	0.10146
3.5	0.1875	-0.00742937	0.480072	0.096893			-0.0909091	0.148148	0	-0.0869565	-0.00742937	0.096893	3.5	-0.00742937	0.096893
4	0.229167	0.0169082	0.369755	0.0572112			0	0.111111	0	-0.0434783	0.0169082	0.0572112	4	0.0169082	0.0572112
4.5	0.291667	-0.0394159	0.29756	0.108109			-0.181818	0.111111	0	-0.0869565	-0.0394159	0.108109	4.5	-0.0394159	0.108109
5	0.0625	0.0396355	0.272431	0.0636722			0.0909091	0.111111	0	-0.0434783	0.0396355	0.0636722	5	0.0396355	0.0636722
5.5	-0.0416667	-0.0486752	0.462106	0.0956937			-0.181818	0.0740741	0	-0.0869565	-0.0486752	0.0956937	5.5	-0.0486752	0.0956937
6	0.208333	0.00603865	0.544862	0.0702874			0	0.111111	0	-0.0869565	0.00603865	0.0702874	6	0.00603865	0.0702874
6.5	0.0208333	-0.0410262	0.32476	0.127756			-0.181818	0.148148	0	-0.130435	-0.0410262	0.127756	6.5	-0.0410262	0.127756
7	0.416667	-0.0394159	0.433013	0.108109			-0.181818	0.111111	0	-0.0869565	-0.0394159	0.108109	7	-0.0394159	0.108109
7.5	0.25	-0.0627653	0.433013	0.14706			-0.181818	0.148148	0	-0.217391	-0.0627653	0.14706	7.5	-0.0627653	0.14706
8	0.0833333	-0.0394159	0.144338	0.108109			-0.181818	0.111111	0	-0.0869565	-0.0394159	0.108109	8	-0.0394159	0.108109
8.5	-0.208333	-0.0915313	0.216506	0.12171			-0.272727	0.037037	0	-0.130435	-0.0915313	0.12171	8.5	-0.0915313	0.12171
9	0.0416667	-0.0579344	0.29756	0.0845066			-0.181818	0.037037	0	-0.0869565	-0.0579344	0.0845066	9	-0.0579344	0.0845066
9.5	0.125	-0.11005	0.544862	0.105263			-0.272727	-0.037037	0	-0.130435	-0.11005	0.105263	9.5	-0.11005	0.105263
10	0.291667	-0.140426	0.71078	0.135334			-0.363636	-0.111111	0	-0.0869565	-0.140426	0.135334	10	-0.140426	0.135334
10.5	0.125	-0.139438	0.544862	0.0989949			-0.272727	-0.111111	0	-0.173913	-0.139438	0.0989949	10.5	-0.139438	0.0989949
11	-0.0833333	-0.141048	0.381881	0.109027			-0.272727	-0.0740741	0	-0.217391	-0.141048	0.109027	11	-0.141048	0.109027
11.5	2.77083	-0.11327	3.05015	0.133875			-0.272727	0.037037	0	-0.217391	-0.11327	0.133875	11.5	-0.11327	0.133875
12	9.45833	-0.00644122	2.12255	0.114048			0	0.148148	0	-0.173913	-0.00644122	0.114048	12	-0.00644122	0.114048
12.5	12.2292	0.170034	2.2526	0.176575			0.272727	0.407407	0	0	0.170034	0.176575	12.5	0.170034	0.176575
13	13.7083	0.56551	2.12255	0.324926			0.545455	0.62963	1	0.0869565	0.56551	0.324926	13	0.56551	0.324926
13.5	15.4792	0.892951	2.81389	0.694978			0.818182	0.666667	2	0.0869565	0.892951	0.694978	13.5	0.892951	0.694978
14	15.25	1.64035	2.38485	1.95436			0.727273	0.703704	5	0.130435	1.64035	1.95436	14	1.64035	1.95436
14.5	15.4167	1.11096	1.95256	1.11758			0.727273	0.62963	3	0.0869565	1.11096	1.11758	14.5	1.11096	1.11758
15	15	0.626043	2.57391	0.326863			0.818182	0.555556	1	0.130435	0.626043	0.326863	15	0.626043	0.326863
15.5	15.3125	0.81712	2.01071	0.706215			0.545455	0.592593	2	0.130435	0.81712	0.706215	15.5	0.81712	0.706215
16	14.2083	0.779461	1.98037	0.742722			0.636364	0.481481	2	0	0.779461	0.742722	16	0.779461	0.742722
16.5	13.6667	0.507356	2.49165	0.312856			0.454545	0.444444	1	0.130435	0.507356	0.312856	16.5	0.507356	0.312856
17	13.4167	0.541941	1.78536	0.329867			0.636364	0.444444	1	0.0869565	0.541941	0.329867	17	0.541941	0.329867
17.5	13.0625	0.457839	2.18214	0.346823			0.454545	0.333333	1	0.0434783	0.457839	0.346823	17.5	0.457839	0.346823
18	12.6042	0.566279	2.57214	0.327579			0.727273	0.407407	1	0.130435	0.566279	0.327579	18	0.566279	0.327579
18.5	12.3958	0.191773	2.01847	0.158757			0.272727	0.407407	0	0.0869565	0.191773	0.158757	18.5	0.191773	0.158757
19	12.1042	0.356061	2.64797	0.391235			0.0909091	0.333333	1	0	0.356061	0.391235	19	0.356061	0.391235
19.5	11.4167	0.18771	1.95256	0.195871			0.454545	0.296296	0	0	0.18771	0.195871	19.5	0.18771	0.195871
20	11.1667	0.172632	1.71998	0.194993			0.363636	0.37037	0	-0.0434783	0.172632	0.194993	20	0.172632	0.194993
20.5	11.2708	0.172632	2.30291	0.194993			0.363636	0.37037	0	-0.0434783	0.172632	0.194993	20.5	0.172632	0.194993
21	10.6875	0.0782828	1.61415	0.0910142			0.0909091	0.222222	0	0	0.0782828	0.0910142	21	0.0782828	0.0910142
21.5	10.5208	0.0993998	1.95822	0.125142			0.181818	0.259259	0	-0.0434783	0.0993998	0.125142	21.5	0.0993998	0.125142
22	9.91667	0.176841	1.65202	0.206883			0.454545	0.296296	0	-0.0434783	0.176841	0.206883	22	0.176841	0.206883
22.5	9.52083	0.0472844	1.50043	0.10146			0.0909091	0.185185	0	-0.0869565	0.0472844	0.10146	22.5	0.0472844	0.10146
23	9.27083	0.0287659	1.73543	0.0788379			0.0909091	0.111111	0	-0.0869565	0.0287659	0.0788379	23	0.0287659	0.0788379
23.5	8.95833	0.0514932	1.75742	0.102906			0.181818	0.111111	0	-0.0869565	0.0514932	0.102906	23.5	0.0514932	0.102906
24	9.10417	0.0834797	2.0133	0.137853			0.272727	0.148148	0	-0.0869565	0.0834797	0.137853	24	0.0834797	0.137853
24.5	8.95833	0.0287659	2.08292	0.0788379			0.0909091	0.111111	0	-0.0869565	0.0287659	0.0788379	24.5	0.0287659	0.0788379
25	8.4375	-0.00322061	1.71733	0.0570239			0	0.0740741	0	-0.0869565	-0.00322061	0.0570239	25	-0.00322061	0.0570239
25.5	7.6875	-0.00139072	1.65241	0.162571			-0.0909091	0.259259	0	-0.173913	-0.00139072	0.162571	25.5	-0.00139072	0.162571
26	7.5625	0.101998	1.12326	0.149758			0.272727	0.222222	0	-0.0869565	0.101998	0.149758	26	0.101998	0.149758
26.5	7.72917	-0.0408798	0.308305	0.112039			0.0909091	-0.037037	0	-0.217391	-0.0408798	0.112039	26.5	-0.0408798	0.112039
27	6.95833	-0.0309984	1.12036	0.0356706			0	-0.037037	0	-0.0869565	-0.0309984	0.0356706	27	-0.0309984	0.0356706
27.5	6.9375	-0.0595447	1.37358	0.101705			-0.181818	0.0740741	0	-0.130435	-0.0595447	0.101705	27.5	-0.0595447	0.101705
28	6.9375	-0.0662055	1.5039	0.0724181			-0.0909091	0	0	-0.173913	-0.0662055	0.0724181	28	-0.0662055	0.0724181
28.5	6.375	-0.0821256	0.960143	0.0903136			0	-0.111111	0	-0.217391	-0.0821256	0.0903136	28.5	-0.0821256	0.0903136
29	6	-0.116711	0.790569	0.072739			-0.181818	-0.111111	0	-0.173913	-0.116711	0.072739	29	-0.116711	0.072739
29.5	6.1875	-0.0619968	0.958107	0.0713413			0	-0.0740741	0	-0.173913	-0.0619968	0.0713413	29.5	-0.0619968	0.0713413
30	5.5625	-0.0847241	1.35064	0.0618153			-0.0909091	-0.0740741	0	-0.173913	-0.0847241	0.0618153	30	-0.0847241	0.0618153
30.5	6.33333	-0.118321	0.790569	0.0863199			-0.181818	-0.0740741	0	-0.217391	-0.118321	0.0863199	30.5	-0.118321	0.0863199
31	5.64583	-0.0998024	1.25882	0.100592			-0.181818	0	0	-0.217391	-0.0998024	0.100592	31	-0.0998024	0.100592
31.5	5.4375	-0.164398	1.20384	0.148853			-0.272727	-0.037037	0	-0.347826	-0.164398	0.148853	31.5	-0.164398	0.148853
32	5.72917	-0.112502	0.810896	0.0744599			-0.0909091	-0.185185	0	-0.173913	-0.112502	0.0744599	32	-0.112502	0.0744599
32.5	5.10417	-0.213292	1.06617	0.138905			-0.363636	-0.185185	0	-0.304348	-0.213292	0.138905	32.5	-0.213292	0.138905
33	4.75	-0.157956	0.829156	0.0988921			-0.272727	-0.185185	0	-0.173913	-0.157956	0.0988921	33	-0.157956	0.0988921
33.5	4.4375	-0.242058	1.03645	0.163778			-0.454545	-0.296296	0	-0.217391	-0.242058	0.163778	33.5	-0.242058	0.163778
34	4.45833	-0.199824	0.844714	0.119029			-0.272727	-0.222222	0	-0.304348	-0.199824	0.119029	34	-0.199824	0.119029
34.5	4.29167	-0.209084	0.71078	0.121819			-0.272727	-0.259259	0	-0.304348	-0.209084	0.121819	34.5	-0.209084	0.121819
35	4.10417	-0.242058	0.531556	0.163778			-0.454545	-0.296296	0	-0.217391	-0.242058	0.163778	35	-0.242058	0.163778
35.5	4.27083	-0.222552	0.531556	0.137954			-0.363636	-0.222222	0	-0.304348	-0.222552	0.137954	35.5	-0.222552	0.137954
36	4.35417	-0.245279	0.40984	0.164298			-0.454545	-0.222222	0	-0.304348	-0.245279	0.164298	36	-0.245279	0.164298
36.5	4.75	-0.213292	1.14564	0.138905			-0.363636	-0.185185	0	-0.304348	-0.213292	0.138905	36.5	-0.213292	0.138905
37	3.875	-0.245279	1.02317	0.164298			-0.454545	-0.222222	0	-0.304348	-0.245279	0.164298	37	-0.245279	0.164298
37.5	3.47917	-0.218343	0.791392	0.126595			-0.272727	-0.296296	0	-0.304348	-0.218343	0.126595	37.5	-0.218343	0.126595
38	3.29167	-0.222918	0.793857	0.208284			-0.545455	-0.259259	0	-0.0869565	-0.222918	0.208284	38	-0.222918	0.208284
38.5	3.5625	-0.24268	1.12326	0.145649			-0.363636	-0.259259	0	-0.347826	-0.24268	0.145649	38.5	-0.24268	0.145649
39	3.89583	-0.353938	0.743899	0.245349			-0.636364	-0.518519	0	-0.26087	-0.353938	0.245349	39	-0.353938	0.245349
39.5	3.75	-0.341092	0.559017	0.202001			-0.454545	-0.518519	0	-0.391304	-0.341092	0.202001	39.5	-0.341092	0.202001
40	3.79167	-0.273057	1.10161	0.167415			-0.454545	-0.333333	0	-0.304348	-0.273057	0.167415	40	-0.273057	0.167415
40.5	2.75	-0.295784	2.70416	0.194491			-0.545455	-0.333333	0	-0.304348	-0.295784	0.194491	40.5	-0.295784	0.194491
						MAX	0.818182	0.703704	5	0.130435	1.64035	1.95436
