# Supplementary material for: ASIC1a is required for neuronal activation via low-intensity ultrasound stimulation in mouse brain
Source: eLife. 2021 Sep 27;10:e61660. doi: 10.7554/eLife.61660 (PMC8510583; doi:10.7554/eLife.61660)
Supplement: Figure 4—source data 1. [file elife-61660-fig4-data1.xlsx]

## Sheet: 工作表1
	Time(s)			2021-02-03						2021-02-20							2021-02-24
	0			0.078689	0.098936	0.080488	0.071053	0.11053		0.076316	0.060504	0.059113	0.04918	0.062687	0.062069		0.015957	0.027068	0.0072289	0.015464	0.02767	0.023377
	1			0.08306	0.080977	0.080488	0.13151	0.11053		0.085088	0.045815	0.051124	0.085246	0.058277	0.056927		0.027282	0.028445	0.0066619	0.026418	0.029496	0.019779
	2			0.092256	0.095236	0.068605	0.077454	0.11053		0.082799	0.065435	0.061049	0.088636	0.065853	0.065699		0.018322	0.020175	0.0078239	0.017109	0.029033	0.024402
	3			0.066393	0.1208	0.056098	0.097368	0.093457		0.076316	0.058824	0.070402	0.092142	0.060081	0.074471		0.0077098	0.023456	0.0072289	0.028434	0.032376	0.01928
	4			0.070631	0.091371	0.042964	0.077454	0.093457		0.074104	0.045815	0.054777	0.085246	0.061731	0.064263		0.006722	0.014361	0.0075228	0.019473	0.031884	0.013948
	5			0.097095	0.10623	0.062195	0.084211	0.093457		0.078567	0.057171	0.076729	0.051913	0.049044	0.083243		0.019584	0.017487	0.0078239	0.018863	0.033882	0.018788
	6			0.079551	0.11006	0.075353	0.071053	0.093457		0.067544	0.042824	0.074835	0.071687	0.061731	0.068135		0.0062442	0.024144	0.0081325	0.022057	0.029678	0.013948
	7			0.075653	0.11799	0.082465	0.098916	0.075439		0.060868	0.057099	0.066257	0.095772	0.071473	0.064263		0.0077098	0.018809	0.0078239	0.032099	0.024442	0.01442
	8			0.12548	0.10248	0.075353	0.1485	0.075439		0.080858	0.057099	0.076355	0.051913	0.053731	0.073354		0.0082205	0.019487	0.0087736	0.022741	0.031182	0.021843
	9			0.099412	0.13059	0.12648	0.13724	0.12446		0.060868	0.055405	0.053558	0.099532	0.073244	0.058876		0.020905	0.021588	0.0087736	0.035346	0.031182	0.014899
	10			0.10485	0.11855	0.089973	0.10694	0.095046		0.074182	0.058824	0.065366	0.05766	0.050453	0.068135		0.0098248	0.020876	0.0087736	0.011537	0.026346	0.017397
	11			0.12889	0.1489	0.082465	0.11546	0.10574		0.07193	0.062363	0.064255	0.081674	0.062065	0.058876		0.0082205	0.013765	0.0094483	0.01455	0.027828	0.015877
	12			0.16422	0.17175	0.11523	0.15679	0.11711		0.062671	0.064181	0.062069	0.051913	0.070398	0.053286		0.0077098	0.023799	0.0094483	0.024158	0.028843	0.016883
	13			0.22116	0.17175	0.13572	0.12453	0.096944		0.069549	0.058824	0.051258	0.078228	0.053731	0.083744		0.0098248	0.023799	0.01053	0.037088	0.028843	0.018447
	14			0.21639	0.19381	0.17886	0.15679	0.16146		0.086081	0.046324	0.067625	0.081674	0.060343	0.058876		0.0098248	0.025338	0.01016	0.013918	0.029881	0.010672
	15			0.29008	0.1997	0.13478	0.17904	0.19038		0.084066	0.071786	0.066489	0.05766	0.062427	0.04748		0.010959	0.017923	0.0094483	0.02802	0.026865	0.010203
	16			0.35925	0.22503	0.16934	0.20458	0.1559		0.08193	0.058824	0.068773	0.081674	0.060628	0.049617		0.012766	0.01866	0.01091	0.02802	0.024326	0.0034256
	17			0.37889	0.31915	0.23527	0.21883	0.22359		0.095614	0.071786	0.062069	0.063817	0.048647	0.057095		0.014048	0.029435	0.011704	0.016549	0.024822	0.0047138
	18			0.44973	0.41621	0.23527	0.25729	0.22211		0.09193	0.049733	0.065459	0.10343	0.077869	0.083744		0.013399	0.025077	0.011302	0.032411	0.027922	0.010672
	19			0.48306	0.50248	0.22886	0.31247	0.30732		0.089971	0.066371	0.066614	0.08895	0.053731	0.072994		0.014714	0.025077	0	0.033362	0.023672	0.012619
	20			0.55713	0.62281	0.24698	0.25088	0.30732		0.11541	0.075805	0.071371	0.070431	0.062427	0.082895		0.015398	0.025951	0.011302	0.036381	0.024723	0.014157
	21			0.49639	0.66915	0.35765	0.38421	0.28756		0.17995	0.064431	0.075087	0.067064	0.064258	0.085172		0.001727	0.027751	0.012118	0.023619	0.027461	0.0065232
	22			0.60806	0.71652	0.3122	0.3104	0.40877		0.26311	0.0493	0.075087	0.073925	0.08382	0.069458		0.015398	0.028679	0.012983	0.043283	0.027461	0
	23			0.64248	0.6902	0.4122	0.46579	0.42632		0.31447	0.0493	0.063252	0.070431	0.085874	0.071667		0.015398	0.032587	0	0.060692	0.021857	0.00747
	24			0.68596	0.64094	0.4122	0.41316	0.39211		0.34652	0.062707	0.075087	0.077554	0.055566	0.065172		0.0022396	0.034668	0.013902	0.051637	0.030374	0.0089466
	25			0.64248	0.61915	0.39114	0.44532	0.50681		0.34652	0.078824	0.075484	0.096784	0.037942	0.079662		0.01756	0.035743	0.014879	0.054827	0.02518	0.0010101
	26			0.599	0.60248	0.3622	0.50088	0.42632		0.29163	0.093517	0.070658	0.081324	0.069948	0.078577		0.016099	0.035743	0	0.081565	0.025759	0.0014545
	27			0.68003	0.55486	0.39114	0.44532	0.50681		0.3063	0.068824	0.087069	0.077554	0.060939	0.10248		0.002766	0.04029	0	0.091577	0.033476	0.0019062
	28			0.599	0.48654	0.44377	0.54009	0.46433		0.33806	0.10882	0.095835	0.077554	0.062822	0.10517		0.019104	0.042724	0.00098967	0.12671	0.030675	0.0028316
	29			0.76877	0.45	0.44377	0.48127	0.62446		0.32193	0.075318	0.092332	0.068919	0.068685	0.067938		0.0050195	0.058793	0.018847	0.11392	0.047325	0.0033058
	30			0.68003	0.42872	0.39114	0.48127	0.55461		0.29163	0.082228	0.11034	0.073925	0.055654	0.059473		0.0044326	0.050766	0.021594	0.15311	0.039141	0
	31			0.76639	0.43582	0.4122	0.38977	0.50681		0.31399	0.1117	0.14778	0.065246	0.073915	0.080979		0.0044326	0.055263	0.022348	0.16392	0.060437	0.0052836
	32			0.63458	0.43582	0.39114	0.44532	0.55461		0.29163	0.24118	0.22243	0.085246	0.057435	0.083433		0.0056231	0.079699	0.044357	0.17604	0.07703	0.0047766
	33			0.67354	0.41498	0.44377	0.44532	0.55461		0.26132	0.41652	0.43899	0.068919	0.048176	0.085942		0.0056231	0.090688	0.029644	0.17604	0.11823	0
	34			0.68003	0.48654	0.39114	0.42245	0.61711		0.28347	0.49712	0.52404	0.089328	0.063255	0.074953		0.0062442	0.077467	0.034415	0.17604	0.16163	0
	35			0.68003	0.49642	0.42331	0.36053	0.54211		0.26808	0.47107	0.52874	0.068919	0.077032	0.091127		0.0062442	0.098132	0.068847	0.14039	0.16435	0
	36			0.64248	0.49008	0.36775	0.38977	0.55461		0.27648	0.46299	0.51424	0.085246	0.04981	0.096552		0.0082205	0.098132	0.043739	0.14574	0.16435	0.0096747
	37			0.68003	0.55486	0.39114	0.38977	0.54211		0.2438	0.45066	0.58934	0.076735	0.057615	0.093809		0.0082205	0.10078	0.076883	0.14039	0.14972	0.0020583
	38			0.72116	0.55486	0.45925	0.38977	0.54211		0.24222	0.43025	0.54864	0.098012	0.04981	0.085057		0.009641	0.098132	0.047649	0.1698	0.14972	0.0031469
	39			0.72548	0.54964	0.40043	0.36053	0.60877		0.2505	0.45066	0.5335	0.10264	0.073731	0.082445		0.009641	0.084383	0.079907	0.17604	0.13311	0.014082
	40			0.72116	0.49008	0.39114	0.36053	0.47544		0.22773	0.42745	0.49221	0.098012	0.063731	0.087731		0	0.084383	0.079907	0.18267	0.15897	0.0054545
	41			0.76639	0.43582	0.36775	0.44532	0.54211		0.25477	0.47107	0.45111	0.085246	0.075954	0.10517		0.011946	0.084383	0.076883	0.14574	0.13782	0.0079545
	42			0.71639	0.44306	0.45925	0.38977	0.49211		0.25943	0.42745	0.44874	0.094548	0.065853	0.10805		0.012766	0.082003	0.086581	0.15142	0.13544	0.021542
	43			0.71639	0.42132	0.40043	0.38977	0.49211		0.23102	0.42745	0.4335	0.12915	0.065853	0.093268		0.013613	0.084383	0.083133	0.18267	0.13782	0.031874
	44			0.58912	0.40745	0.40043	0.38977	0.54211		0.25477	0.40784	0.40637	0.14106	0.072481	0.096136		0.016337	0.079699	0.052098	0.15142	0.12591	0.044046
	45			0.67354	0.39415	0.40043	0.36053	0.60877		0.23731	0.42745	0.37972	0.094548	0.077136	0.10517		0.021589	0.06799	0.083133	0.15142	0.12591	0.063102
	46			0.71639	0.41498	0.40043	0.36053	0.54211		0.23984	0.38824	0.35619	0.13525	0.08531	0.12347		0.051655	0.082003	0.052098	0.15747	0.11401	0.068531
	47			0.62592	0.36489	0.36775	0.36053	0.47544		0.24816	0.38824	0.31151	0.1484	0.1181	0.10209		0.070874	0.082003	0.052098	0.14574	0.12591	0.083916
	48			0.71639	0.34058	0.42331	0.30789	0.54211		0.22818	0.39729	0.29365	0.15552	0.18706	0.11767		0.10165	0.094737	0.086581	0.15747	0.12591	0.070455
	49			0.66639	0.36099	0.33851	0.28421	0.59925		0.20999	0.34939	0.28312	0.14239	0.21737	0.10517		0.073877	0.072435	0.052098	0.18267	0.12148	0.068531
	50			0.71113	0.31817	0.36775	0.30789	0.54211		0.18425	0.34097	0.26207	0.17096	0.32914	0.092672		0.077052	0.072435	0.054561	0.15747	0.12591	0.049932
	51			0.5783	0.36099	0.34161	0.30789	0.52782		0.22193	0.37668	0.26003	0.19953	0.30373	0.1279		0.077052	0.086842	0.049799	0.15747	0.10617	0.068531
	52			0.66639	0.32017	0.36775	0.28421	0.54211		0.22193	0.35882	0.231	0.19953	0.3204	0.11833		0.077052	0.086842	0.052098	0.15142	0.13297	0.051515
	53			0.66639	0.34058	0.40043	0.36053	0.59925		0.21587	0.34031	0.21445	0.24888	0.29635	0.14284		0.10562	0.086842	0.052098	0.11543	0.12062	0.05483
	54			0.71113	0.34058	0.4372	0.33421	0.52782		0.21587	0.36791	0.21113	0.18828	0.30373	0.13295		0.077052	0.053509	0.054561	0.16392	0.12531	0.05483
	55			0.62592	0.34058	0.40043	0.36053	0.59925		0.21876	0.36826	0.18639	0.17096	0.25373	0.19388		0.073877	0.06799	0.057207	0.15747	0.13024	0.053147
	56			0.66639	0.34362	0.34161	0.36053	0.58826		0.19116	0.33155	0.17786	0.23819	0.24767	0.22805		0.077052	0.057532	0.057207	0.15747	0.11965	0.060209
	57			0.71113	0.34058	0.3122	0.30789	0.59925		0.18014	0.31496	0.1718	0.18828	0.24179	0.308		0.073877	0.074773	0.057207	0.16392	0.14877	0.076602
	58			0.61639	0.35611	0.40043	0.36053	0.58826		0.17041	0.31337	0.17511	0.17936	0.22138	0.28913		0.073877	0.059649	0.057207	0.15747	0.14092	0.040693
	59			0.61639	0.35248	0.3122	0.23421	0.59925		0.19693	0.34031	0.17511	0.20878	0.22296	0.37601		0.070874	0.061842	0.057207	0.16392	0.12722	0.060209
	60			0.71113	0.34362	0.34161	0.33421	0.52782		0.1813	0.29742	0.16031	0.25191	0.24436	0.36581		0.043847	0.057532	0.057207	0.097251	0.12463	0.058358

## Sheet: 工作表2
		time(s)		2021-02-03								2021-02-20					2021-02-24
		0		0.03913	0.048837	0.0525	0.044444	0.047727	0.042857			0.088636	0.084507	0.084173			0.049606	0.054545	0.047727	0.057447	0.10263	0.042105
		1		0.045059	0.048837	0.066689	0.044444	0.044192	0.046341			0.090057	0.084507	0.10435			0.044252	0.061503	0.050175	0.05175	0.09386	0.039685
		2		0	0.048837	0.061711	0.050142	0.070455	0.046341			0.11318	0.07679	0.095568			0.049606	0.062471	0.053991	0.059328	0.11188	0.056927
		3		0.03913	0.052713	0.056987	0.011681	0.044192	0.046341			0.099633	0.078179	0.11068			0.054984	0.060227	0.055303	0.050315	0.076316	0.042105
		4		0.051553	0.052713	0.061711	0.056296	0.04081	0.05			0.13772	0.10282	0.10518			0.059252	0.074855	0.059368	0.061488	0.10263	0.039685
		5		0.045059	0.048837	0.0525	0.050142	0.04081	0.05			0.12932	0.10132	0.11254			0.056383	0.070588	0.051238	0.057818	0.10263	0.044612
		6		0.0039337	0.048837	0.061711	0.050142	0.051427	0.05			0.14101	0.078179	0.15142			0.056666	0.067322	0.06219	0.06136	0.13195	0.042105
		7		0.045059	0.048837	0.066689	0.011681	0.051427	0.053846			0.17156	0.10132	0.15142			0.066861	0.068379	0.068124	0.057818	0.13195	0.039685
		8		0.0039337	0.028904	0.071944	0.044444	0.047727	0.053846			0.17281	0.11532	0.17397			0.073441	0.071622	0.071245	0.063632	0.10338	0.044612
		9		0.051553	0.052713	0.071944	0.056296	0.055303	0.053846			0.20495	0.11051	0.18323			0.075161	0.072727	0.077826	0.067177	0.14288	0.044612
		10		0.045059	0.052713	0.066689	0.050142	0.051427	0.05			0.2411	0.10585	0.18821			0.084252	0.078442	0.088636	0.074546	0.12416	0.068421
		11		0.0086957	0.052713	0.071944	0.050142	0.051427	0.057895			0.2873	0.1254	0.2036			0.096373	0.08203	0.10646	0.070926	0.11537	0.044612
		12		0.3087	0.19639	0.061711	0.03266	0.088636	0.076471			0.38529	0.15996	0.23838			0.13713	0.085745	0.17779	0.077496	0.11767	0.047209
		13		0.4087	0.38605	0.10331	0.13159	0.1645	0.14			0.47975	0.20666	0.3036			0.31048	0.092239	0.32931	0.080243	0.24053	0.044612
		14		0.48012	0.41236	0.30607	0.22963	0.27994	0.37059			0.55125	0.24963	0.34018			0.34854	0.091477	0.35292	0.098834	0.35144	0.049903
		15		0.2837	0.51763	0.35118	0.32487	0.31721	0.4			0.63247	0.30282	0.32799			0.34854	0.11776	0.37078	0.10709	0.35144	0.074831
		16		0.4087	0.47428	0.3775	0.25344	0.38864	0.42941			0.61774	0.31444	0.37503			0.35698	0.13701	0.33506	0.1216	0.37957	0.078225
		17		0.2837	0.4416	0.35118	0.28091	0.36483	0.42941			0.65032	0.34827	0.38254			0.34854	0.15734	0.35292	0.15521	0.30598	0.089254
		18		0.4087	0.47428	0.35118	0.35783	0.38864	0.42941			0.64503	0.35044	0.42522			0.3053	0.17111	0.34478	0.18739	0.35144	0.11106
		19		0.4087	0.35973	0.28659	0.28091	0.38864	0.34444			0.69703	0.31444	0.42332			0.33253	0.19751	0.31237	0.19003	0.32574	0.15175
		20		0.4087	0.41236	0.2688	0.25344	0.34318	0.37368			0.69703	0.29171	0.39026			0.30798	0.22094	0.32931	0.21834	0.35144	0.1589
		21		0.3087	0.38605	0.1975	0.31296	0.34318	0.32105			0.73549	0.30282	0.40634			0.29805	0.20016	0.31237	0.2189	0.30219	0.1589
		22		0.24203	0.41236	0.1575	0.28091	0.34318	0.28095			0.66355	0.3377	0.45577			0.30798	0.22408	0.32197	0.22239	0.30219	0.1589
		23		0.2837	0.33605	0.1738	0.28091	0.34318	0.26364			0.6778	0.3377	0.40923			0.29103	0.20901	0.28864	0.2287	0.30219	0.15175
		24		0.2087	0.35973	0.1275	0.28091	0.27994	0.24783			0.73436	0.3394	0.41788			0.28425	0.22135	0.29847	0.22518	0.30598	0.18747
		25		0.24203	0.33605	0.11888	0.18201	0.26364	0.20435			0.69514	0.28108	0.44128			0.3053	0.21818	0.28208	0.20576	0.28053	0.17953
		26		0.24203	0.41236	0.11888	0.18201	0.26364	0.20435			0.6778	0.31393	0.3978			0.29103	0.23053	0.29542	0.21249	0.30219	0.17202
		27		0.24203	0.33605	0.10331	0.22963	0.26364	0.19167			0.65593	0.28009	0.42124			0.29103	0.21218	0.28864	0.19605	0.24053	0.17953
		28		0.2087	0.36224	0.071048	0.16296	0.24864	0.19167			0.58563	0.25934	0.39515			0.3053	0.20606	0.30243	0.20259	0.24053	0.17202
		29		0.2087	0.31462	0.071048	0.18201	0.24864	0.18			0.63632	0.29171	0.42679			0.29805	0.19705	0.28519	0.20909	0.24053	0.15175
		30		0.18142	0.33605	0.071048	0.16296	0.27325	0.18			0.59675	0.24963	0.42124			0.29805	0.21218	0.30243	0.20596	0.24053	0.145
		31		0.2087	0.31462	0.059318	0.22963	0.23479	0.18			0.65593	0.24032	0.38693			0.31282	0.21532	0.30969	0.20259	0.24053	0.17953
		32		0.2087	0.31462	0.059318	0.16296	0.20864	0.16923			0.64224	0.24032	0.42124			0.29497	0.20606	0.31721	0.19929	0.24053	0.17202
		33		0.2087	0.3071	0.059318	0.16296	0.24864	0.12222			0.575	0.24726	0.41229			0.31282	0.21235	0.29935	0.19269	0.24053	0.17953
		34		0.18142	0.33605	0.065	0.13159	0.23479	0.12222			0.63934	0.21948	0.43046			0.31282	0.20292	0.325	0.20939	0.20053	0.145
		35		0.18142	0.28605	0.065	0.13159	0.23479	0.13077			0.59318	0.24963	0.43046			0.30243	0.21558	0.33506	0.21647	0.24053	0.15175
		36		0.1587	0.33605	0.065	0.1463	0.23479	0.12222			0.64224	0.28009	0.39183			0.29497	0.20292	0.30682	0.20269	0.24053	0.15175
		37		0.1587	0.29514	0.059318	0.16296	0.19633	0.12222			0.63632	0.21586	0.38931			0.32062	0.20927	0.325	0.2028	0.16053	0.17953
		38		0.1587	0.31462	0.071048	0.1463	0.1479	0.12222			0.63632	0.23464	0.43046			0.29497	0.23273	0.31456	0.20616	0.1836	0.1589
		39		0.1587	0.28605	0.03375	0.1463	0.22197	0.078571			0.6045	0.26793	0.37503			0.31821	0.22273	0.33308	0.20638	0.24053	0.18747
		40		0.1587	0.33605	0.03375	0.1463	0.18493	0.11429			0.65593	0.28009	0.36881			0.31018	0.21273	0.31456	0.22465	0.22206	0.1589
		41		0.1587	0.21938	0.03375	0.1463	0.22197	0.078571			0.6045	0.25736	0.39451			0.31018	0.20936	0.31456	0.21333	0.16053	0.1589
		42		0.1587	0.267	0.03375	0.13159	0.15787	0.072414			0.5971	0.29119	0.41898			0.30243	0.21273	0.31456	0.20291	0.16053	0.18747
		43		0.075362	0.267	0.03879	0.13159	0.18493	0.11429			0.63632	0.25736	0.40061			0.31821	0.22273	0.31456	0.2208	0.21886	0.15175
		44		0.1587	0.23605	0.029015	0.1463	0.18493	0.072414			0.68902	0.26793	0.38569			0.31018	0.21967	0.3226	0.22465	0.17719	0.1589
		45		0.075362	0.267	0.03375	0.072767	0.18493	0.072414			0.65318	0.28009	0.38331			0.33523	0.21616	0.33094	0.22859	0.16053	0.1589
		46		0.075362	0.21938	0.03879	0.072767	0.1479	0.072414			0.6868	0.26793	0.39183			0.32656	0.21293	0.3226	0.22551	0.14514	0.19587
		47		0.1587	0.23605	0.065	0.083796	0.1479	0.078571			0.62992	0.26793	0.35289			0.31821	0.23062	0.33094	0.22151	0.20053	0.1589
		48		0.090514	0.28605	0.0065323	0.13159	0.15787	0.072414			0.66818	0.27901	0.35289			0.33523	0.24229	0.3226	0.20687	0.19531	0.1589
		49		0.1587	0.21938	0.03375	0.072767	0.1479	0.072414			0.67073	0.27901	0.33983			0.34425	0.2201	0.33094	0.22642	0.12053	0.1589
		50		0.18142	0.23605	0.03879	0.072767	0.1479	0.072414			0.67073	0.26793	0.36881			0.33523	0.23832	0.32001	0.23377	0.20053	0.18747
		51		0.18142	0.23605	0.03879	0.062963	0.1479	0.037931			0.70227	0.24468	0.36881			0.2881	0.22055	0.33962	0.22642	0.20053	0.1589
		52		0.18142	0.20423	0.044167	0.13159	0.13864	0.078571			0.67073	0.27782	0.33983			0.32425	0.23142	0.33962	0.21079	0.19531	0.1589
		53		0.1587	0.21938	0.03879	0.072767	0.1479	0.072414			0.65032	0.30282	0.36881			0.29602	0.22055	0.33094	0.22228	0.16053	0.16646
		54		0.090514	0.23605	0.03375	0.062963	0.1479	0.042857			0.66275	0.27901	0.34771			0.31562	0.23536	0.33962	0.2231	0.16053	0.18747
		55		0.18142	0.23605	0.015431	0.072767	0.1479	0.042857			0.62652	0.26623	0.35289			0.29602	0.22828	0.33962	0.23501	0.17719	0.1589
		56		0.1587	0.23605	0.010833	0.054191	0.1479	0.042857			0.64425	0.26793	0.36242			0.30425	0.22104	0.32001	0.2189	0.15183	0.16646
		57		0.18142	0.25447	0.049914	0.083796	0.1479	0.048148			0.6868	0.29	0.37283			0.31562	0.22438	0.32864	0.2231	0.16053	0.1589
		58		0.2087	0.21938	0.015431	0.062963	0.13864	0.072414			0.64735	0.2552	0.33217			0.30425	0.25204	0.32864	0.22846	0.19531	0.16646
		59		0.18142	0.21938	0.049914	0.083796	0.1479	0.037931			0.68449	0.26793	0.36881			0.30425	0.22905	0.32001	0.23181	0.21507	0.16646
		60		0.1087	0.23605	0.025648	0.072767	0.10292	0.042857			0.64425	0.29062	0.32534			0.29602	0.25368	0.32864	0.2274	0.13553	0.1589
