# Supplementary material for: ASIC1a is required for neuronal activation via low-intensity ultrasound stimulation in mouse brain
Source: eLife. 2021 Sep 27;10:e61660. doi: 10.7554/eLife.61660 (PMC8510583; doi:10.7554/eLife.61660)
Supplement: Figure 4—source data 2. [file elife-61660-fig4-data2.xlsx]

## Sheet: 工作表1
		Time(s)	Contorl
		1~10	0.8813	1.06448	0.755231	1.0127	0.973014	0.545151	0.647325	0.775507	0.13559	0.211924	0.0785663	0.236041	0.300163	0.181694
		11~20	3.02266	2.71946	1.68427	1.90469	1.78174	0.617507	0.64298	0.753066	0.114077	0.226287	0.0929887	0.252035	0.268537	0.119289
		21~30	6.34075	5.9556	3.84533	4.35252	4.47445	0.730057	0.800746	0.763287	0.105226	0.375336	0.0901667	0.742576	0.3015	0.0405265
		31~40	6.90431	4.87842	4.07127	4.01413	5.53788	3.78699	4.34897	0.82626	0.0661065	0.850251	0.49854	1.63229	1.27763	0.0417493
		41~50	6.90306	3.98736	3.93774	3.62253	5.3449	4.06863	3.74105	1.2606	0.412833	0.808045	0.691937	1.59609	1.29265	0.487645
		51~60	6.56956	3.42659	3.66854	3.23158	5.70623	3.43136	2.01407	2.03322	0.766782	0.700805	0.550475	1.51585	1.27714	0.574711
		Time(s)	ASIC1a
		1~10	0.327375	0.482003	0.631481	0.422561	0.49592	0.496989	0.944124	1.32455	0.603535	0.676188	0.617642	0.596683	1.11087	0.449291
		11~20	3.2266	3.54757	2.42841	2.09377	2.62977	2.88947	2.57084	3.3091	2.78053	1.28191	2.89136	1.23526	2.77698	0.805117
		21~30	2.48168	3.62972	1.30939	2.30251	2.90589	2.36235	3.01444	4.17723	2.97504	2.13516	2.99108	2.1333	2.81284	1.66382
		31~40	1.7938	3.12635	0.589469	1.57522	2.19173	1.31682	2.46039	4.06304	3.06874	2.13233	3.17427	2.05376	2.21914	1.65743
		41~50	1.28016	2.50334	0.349397	1.099	1.70261	0.799268	2.72182	3.78935	3.22318	2.21211	3.22159	2.1998	1.75045	1.66168
		51~60	1.66877	2.29709	0.329239	0.760563	1.43799	0.533616	2.7309	3.56135	3.064	2.30867	3.31105	2.25046	1.78486	1.6621
