# Supplementary material for: ASIC1a is required for neuronal activation via low-intensity ultrasound stimulation in mouse brain
Source: eLife. 2021 Sep 27;10:e61660. doi: 10.7554/eLife.61660 (PMC8510583; doi:10.7554/eLife.61660)
Supplement: Figure 4—source data 3. [file elife-61660-fig4-data3.xlsx]

## Sheet: AUC control-ASIC1a
							Time(s)	Control								ASIC1a
							1~10	0.487684	0	0.946739	0.163173	0.382145	3.58514	0.52651	0	1.78684	0.558262	0.441913	0	1.32006	1.05532	1.36587	3.20224
							11~20	1.15138	1.7218	1.17767	2.36522	1.49701	2.42562	1.01863	2.3201	0.447636	1.03061	1.37063	0.672233	0.908362	1.87944	1.38657	1.98491
							21~30	2.18263	1.9956	0.984323	2.61784	2.67547	3.05929	1.15589	2.17391	6.23248	4.79211	3.89502	1.91996	1.06061	7.36289	5.99653	4.10564
							31~40	3.41675	3.37803	2.16205	4.09834	3.30565	3.30462	3.04982	4.3294	5.73041	6.3763	0	2.60632	0.830673	9.87577	3.92354	6.5407
							41~50	0	2.98062	2.30718	0.386382	4.67756	4.835	4.46116	5.36075	0	4.83382	0	2.95496	0.316387	1.41334	0	1.68735
							51~60	0	0	0	0	2.46232	4.85359	0.281784	2.14746	0	0	0	1.45686	0.324698	0	0	0

## Sheet: Control-saponin
	time(s)
	0		0.0634227		0		0.109091		0		0.0524455		0.367591		0.10695		0
	1		0.0634227		0		0.0727273		0.0815864		0.0558773		0.297918		0.0654773		0
	2		0.0684591		0		0.0863636		0		0.0594409		0.278655		0.0784682		0
	3		0.0684591		0		0.0892273		0		0.0670182		0.328064		0.0231727		0
	4		0		0		0.101186		0.0815864		0.0670182		0.340641		0.0316077		0
	5		0		0		0.101186		0		0		0.435036		0.0784682		0
	6		0.0912409		0		0.110714		0		0.0710455		0.329845		0.0437009		0
	7		0.0851091		0		0.0701318		0		0		0.416718		0.0468864		0
	8		0.0792818		0		0.124241		0		0		0.374236		0.0468864		0
	9		0		0		0.0760318		0		0		0.385859		0.0568818		0
	10		0		0		0.120768		0		0.0710455		0.428741		0.00297086		0
	11		0.0525455		0.179427		0.0846682		0.223632		0.130145		0.191245		0.0971318		0.227273
	12		0.15105		0.224468		0.1323		0.276391		0.165309		0.245232		0.119995		0.305641
	13		0.172109		0.177095		0.146523		0.288195		0.110723		0.193855		0.129232		0.309918
	14		0.108091		0.179427		0.1131		0.288195		0.241259		0.217936		0.0885364		0.227273
	15		0.11175		0.179427		0.158677		0.221445		0.120045		0.217936		0.0942182		0.227273
	16		0.119386		0.179427		0.127132		0.228214		0.126686		0.243145		0.103109		0.227273
	17		0.123377		0.1868		0.0978136		0.225886		0.202295		0.278655		0.106177		0.227273
	18		0.119386		0.126264		0.106205		0.228214		0.137364		0.287895		0.112473		0.227273
	19		0.123377		0.192064		0.109091		0.230618		0.148991		0.205341		0.125759		0.227273
	20		0.140609		0.194805		0.0835455		0.308859		0.157341		0.260027		0.0810227		0.227273
	21		0.140609		0.197627		0.0892273		0.2331		0.170877		0.269264		0.0840591		0.227273
	22		0.0755545		0.203527		0.0951045		0.243923		0.256409		0.307795		0.0902909		0.227273
	23		0.0792818		0.203527		0.0951045		0.243923		0.1966		0.288536		0.0563909		0.227273
	24		0.195064		0.135686		0.101186		0.243923		0.202295		0.268945		0.103491		0.227273
	25		0.386768		0.139859		0.114005		0.243923		0.306441		0.298591		0.100095		0.128459
	26		0.208514		0.139859		0.114005		0.253114		0.2985		0.298591		0.114082		0.227273
	27		0.223068		0.223545		0.114005		0.249936		0.4021		0.381964		0.121505		0.227273
	28		0.335568		0.235109		0.0821545		0.348964		0.323255		0.329845		0.137291		0.227273
	29		0.238855		0.247932		0.0885091		0.267114		0.323255		0.309932		0.195109		0.227273
	30		0.458091		0.343055		0.0985		0.270977		0.234127		0.351632		0.226132		0.227273
	31		0.471864		0.343055		0.162895		0.378027		0.241259		0.278655		0.298091		0.350123
	32		0.25605		0.330577		0.120336		0.384614		0.412382		0.329845		0.261809		0.472955
	33		0.368536		0.267382		0.180659		0.398709		0.323255		0.397705		0.274923		0.460364
	34		0.368536		0.343055		0.210332		0.398709		0.241259		0.278655		0.288723		0.472955
	35		0.357059		0.262236		0.232468		0.414177		0.241259		0.322364		0.2959		0.472955
	36		0.501364		0.356505		0.256818		0.422495		0.351109		0.3455		0.318627		0.472955
	37		0.533818		0.363636		0.256818		0.536136		0.423077		0.37795		0.318627		0.472955
	38		0.330477		0.363636		0.263291		0.422495		0.341445		0.300936		0.381759		0.343823
	39		0		0.378786		0.283732		0.440436		0.371695		0.312409		0.326632		0.4665
	40		0		0.395259		0.290909		0.334109		0.483682		0.369564		0.343332		0.460364
	41		0		0.494091		0.298282		0.219327		0.483682		0.381964		0.379818		0.487
	42		0		0.413223		0.385659		0		0.382673		0.348227		0.399795		0.595818
	43		0		0.528545		0.404218		0		0.406164		0.4479		0.370282		0.487
	44		0		0.4329		0.365291		0		0.511864		0.399545		0.421086		0.487
	45		0		0.443459		0.466955		0		0.511864		0.426877		0.410268		0.479818
	46		0		0.340909		0.241323		0		0.511864		0.505909		0.421086		0.616864
	47		0		0.129868		0		0		0.526955		0.549227		0.508		0.606045
	48		0		0		0		0		0.431945		0.638955		0.547909		0.616864
	49		0		0		0		0		0.445805		0.583545		0.624591		0.502773
	50		0		0		0		0		0.445805		0.736136		0.413323		0.502773
	51		0		0		0		0		0.576909		0.736136		0.0751227		0.494636
	52		0		0		0		0		0.369023		0.739364		0		0.520545
	53		0		0		0		0		0.369023		0.720591		0		0.3739
	54		0		0		0		0		0.369023		0.723318		0		0.227273
	55		0		0		0		0		0.382673		0.729591		0		0.227273
	56		0		0		0		0		0.153105		0.603318		0		0.0524455
	57		0		0		0		0		0.0196677		0.2332		0		0
	58		0		0		0		0		0		0		0		0
	59		0		0		0		0		0		0		0		0
	60		0		0		0		0		0		0		0		0
	61		0		0		0		0		0		0		0		0
	62		0		0		0		0		0		0		0		0
	63		0		0		0		0		0		0		0		0
	64		0		0		0		0		0		0		0		0
	65		0		0		0		0		0		0		0		0
	66		0		0		0		0		0		0		0		0
	67		0		0		0		0		0		0		0		0
	68		0		0		0		0		0		0		0		0
	69		0		0		0		0		0		0		0		0
	70		0		0		0		0		0		0		0		0
	71		0		0		0		0		0		0		0		0
	72		0		0		0		0		0		0		0		0
	73		0		0		0		0		0		0		0		0
	74		0		0		0		0		0		0		0		0
	75		0		0		0		0		0		0		0		0
	76		0		0		0		0		0		0		0		0
	77		0		0		0		0		0		0		0		0
	78		0		0		0		0		0		0		0		0
	79		0		0		0		0		0		0		0		0
	80		0		0		0		0		0		0		0		0
	81		0		0		0		0		0		0		0		0
	82		0		0		0		0		0		0		0		0
	83		0		0		0		0		0		0		0		0
	84		0		0		0		0		0		0		0		0
	85		0		0		0		0		0		0		0		0
	86		0		0		0		0		0		0		0		0
	87		0		0		0		0		0		0		0		0
	88		0		0		0		0		0		0		0		0
	89		0		0		0		0		0		0		0		0
	90		0		0		0		0		0		0		0		0
	91		0		0		0		0		0		0		0		0
	92		0		0		0		0		0		0		0		0
	93		0		0		0		0		0		0		0		0
	94		0		0		0		0		0		0		0		0
	95		0		0		0		0		0		0		0		0
	96		0		0		0		0		0		0		0		0
	97		0		0		0		0		0		0		0		0
	98		0		0		0		0		0		0		0		0
	99		0		0		0		0		0		0		0		0
	100		0		0		0		0		0		0		0		0
	101		0		0		0		0		0		0		0		0
	102		0		0		0		0		0		0		0		0
	103		0		0		0		0		0		0		0		0
	104		0		0		0		0		0		0		0		0
	105		0		0		0		0		0		0		0		0
	106		0		0		0		0		0		0		0		0
	107		0		0		0		0		0		0		0		0
	108		0		0		0		0		0		0		0		0
	109		0		0		0		0		0		0		0		0
	110		0		0		0		0		0		0		0		0
	111		0		0		0		0		0		0		0		0
	112		0		0		0		0		0		0		0		0
	113		0		0		0		0		0		0		0		0
	114		0		0		0		0		0		0		0		0
	115		0		0		0		0		0		0		0		0
	116		0		0		0		0		0		0		0		0
	117		0		0		0		0		0		0		0		0
	118		0		0		0		0		0		0		0		0
	119		0		0		0		0		0		0		0		0
	120		0		0		0		0		0		0		0		0
	121		0		0		0		0		0		0		0		0
	122		0		0		0		0		0		0		0		0
	123		0		0		0		0		0		0		0		0
	124		0		0		0		0		0		0		0		0
	125		0		0		0		0		0		0		0		0
	126		0		0		0		0		0		0		0		0
	127		0		0		0		0		0		0		0		0
	128		0		0		0		0		0		0		0		0
	129		0		0		0		0		0		0		0		0
	130		0		0		0		0		0		0		0		0
	131		0		0		0		0		0		0		0		0
	132		0		0		0		0		0		0		0		0
	133		0		0		0		0		0		0		0		0
	134		0		0		0		0		0		0		0		0
	135		0		0		0		0		0		0		0		0
	136		0		0		0		0		0		0		0		0
	137		0		0		0		0		0		0		0		0
	138		0		0		0		0		0		0		0		0
	139		0		0		0		0		0		0		0		0
	140		0		0		0		0		0		0		0		0
	141		0		0		0		0		0		0		0		0
	142		0		0		0		0		0		0		0		0
	143		0		0		0		0		0		0		0		0
	144		0		0		0		0		0		0		0		0
	145		0		0		0		0		0		0		0		0
	146		0		0		0		0		0		0		0		0
	147		0		0		0		0		0		0		0		0
	148		0		0		0		0		0		0		0		0
	149		0		0		0		0		0		0		0		0
	150		0		0		0		0		0		0		0		0
	151		0		0		0		0		0		0		0		0
	152		0		0		0		0		0		0		0		0
	153		0		0		0		0		0		0		0		0
	154		0		0		0		0		0		0		0		0
	155		0		0		0		0		0		0		0		0
	156		0		0		0		0		0		0		0		0
	157		0		0		0		0		0		0		0		0
	158		0		0		0		0		0		0		0		0
	159		0		0		0		0		0		0		0		0
	160		0		0		0		0		0		0		0		0
	161		0		0		0		0		0		0		0		0
	162		0		0		0		0		0		0		0		0
	163		0		0		0		0		0		0		0		0
	164		0		0		0		0		0		0		0		0
	165		0		0		0		0		0		0		0		0
	166		0		0		0		0		0		0		0		0
	167		0		0		0		0		0		0		0		0
	168		0		0		0		0		0		0		0		0
	169		0		0		0		0		0		0		0		0
	170		0		0		0		0		0		0		0		0
	171		0		0		0		0		0		0		0		0
	172		0		0		0		0		0		0		0		0
	173		0		0		0		0		0		0		0		0
	174		0		0		0		0		0		0		0		0
	175		0		0		0		0		0		0		0		0
	176		0		0		0		0		0		0		0		0
	177		0		0		0		0		0		0		0		0
	178		0		0		0		0		0		0		0		0
	179		0		0		0		0		0		0		0		0
	180		0		0		0		0		0		0		0		0
	Max		0.533818		0.528545		0.466955		0.536136		0.576909		0.739364		0.624591		0.616864

## Sheet: ASIC1a-saponin
	time(s)
	0		0.219436		0.0541864		0.0366077		0		0.163636		0.158105		0.147782		0.332595
	1		0.262777		0.0591		0.07025		0		0.1441		0.0321632		0.192568		0.360309
	2		0.211123		0.0578455		0.039115		0		0.139791		0.0922273		0.147782		0.202082
	3		0.227941		0.0292364		0.0426232		0		0.152941		0.165855		0.147782		0.3005
	4		0.262777		0.0566091		0.0426232		0		0.11895		0.0922273		0.147782		0.2729
	5		0.187282		0.0642864		0.0435309		0		0.123232		0.120605		0.125391		0.345555
	6		0.130277		0.0642864		0.0463364		0		0.132014		0.0990091		0.125391		0.360309
	7		0.123368		0.0697773		0.0463364		0		0.11405		0.136145		0.125391		0.3005
	8		0.172245		0.0786273		0.0492636		0		0.1186		0.0639955		0.103		0.407009
	9		0.0682545		0.0457455		0.0178877		0		0.123232		0.0933409		0.125391		0.314855
	10		0.0621455		0.0113114		0.0512864		0		0.142659		0.161395		0.103		0.343841
	11		0		0.0697773		0.0472955		0		0.0686318		0.0443168		0.103		0.177932
	12		0.0334377		0.102273		0.0861091		0.0378786		0.0798318		0.123973		0.147782		0.142218
	13		0.0389473		0.134136		0.114695		0.0763955		0.107691		0.159636		0.147782		0.115214
	14		0		0.0871136		0.0593409		0.0819		0.102532		0.136145		0.125391		0.180886
	15		0		0.0871136		0.0951955		0.08045		0.0985955		0.136145		0.125391		0.212091
	16		0		0.0930045		0.0964		0.0826455		0.110605		0.155568		0.147782		0.22295
	17		0.0139036		0.0992318		0.115118		0.0874136		0.0924909		0.169373		0.125391		0.228177
	18		0.0461955		0.104136		0.251282		0.0882591		0.100886		0.253759		0.125391		0.239991
	19		0.124345		0.14905		0.31565		0.0909091		0.0351959		0.341323		0.144682		0.154945
	20		0.319468		0.198245		0.327805		0.0927636		0.0811455		0.557		0.284964		0.277164
	21		0.491545		0.408327		0.327805		0.0483545		0.132764		0.680045		0.519455		0.177932
	22		0.532227		0.414695		0.349786		0.108227		0.103618		0.767455		0.5445		0.286523
	23		0.576318		0.530727		0.414082		0.197627		0.118182		0.680045		0.557591		0.25425
	24		0.526955		0.421214		0.419632		0.219941		0.0820045		0.680045		0.577955		0.343841
	25		0.673773		0.538773		0.443123		0.231123		0.128386		0.672773		0.557318		0.431332
	26		0.641318		0.490864		0.462227		0.235109		0.155818		0.767455		0.657318		0.4505
	27		0.624364		0.531455		0.504909		0.235109		0.106941		0.767455		0.673364		0.511818
	28		0.777		0.5065		0.449341		0.239236		0.0677318		0.816864		0.669455		0.579591
	29		0.796545		0.564		0.360214		0.239236		0.0830591		0.816864		0.722364		0.603818
	30		0.865409		0.572864		0		0.239236		0.0830591		0.870773		0.749455		0.654909
	31		0.858818		0.572864		0		0.243505		0.0938682		0.816864		0.837		0.570727
	32		0.978318		0.612227		0		0.247932		0.0938682		0.899591		0.885136		0.622545
	33		0.874727		0.591273		0		0.247932		0.0884		1.00532		0.906818		0.546273
	34		0.975591		0.600864		0		0.247932		0.0510818		1.02968		0.710364		0.596182
	35		1.00314		0.610682		0		0.252527		0.105195		1.10836		0.209495		0.596182
	36		0.521045		0.694273		0		0.343055		0.123232		1.10836		0		0.709955
	37		0.0860682		0.694273		0		0.257291		0.105195		1.10527		0		0.709955
	38		0		0.687682		0		0.247932		0.0563		1.02		0		0.739091
	39		0		0.675727		0		0.262236		0.0563		0.929773		0		0.797364
	40		0		0.7		0		0.272727		0.031405		0.834318		0		0.649955
	41		0		0.8115		0		0.267382		0.0261073		0.691682		0		0.649955
	42		0		0.842273		0		0.267382		0.0368423		0.304495		0		0.537091
	43		0		0.892364		0		0.181818		0.0368423		0		0		0.175323
	44		0		0.853955		0		0.284091		0		0		0		0
	45		0		0.743955		0		0.284091		0		0		0		0
	46		0		0.339773		0		0.290136		0.0663273		0		0		0
	47		0		0		0		0.395259		0.0540455		0		0		0
	48		0		0		0		0.386845		0.0727273		0		0		0
	49		0		0		0		0.303032		0.00779227		0		0		0
	50		0		0		0		0.317123		0		0		0		0
	51		0		0		0		0.324677		0.031405		0		0		0
	52		0		0		0		0.332595		0.0192514		0		0		0
	53		0		0		0		0.239236		0.0443182		0		0		0
	54		0		0		0		0.259741		0.0377623		0		0		0
	55		0		0		0		0.142045		0.0580636		0		0		0
	56		0		0		0		0		0.0652773		0		0		0
	57		0		0		0		0		0		0		0		0
	58		0		0		0		0		0.00338982		0		0		0
	59		0		0		0		0		0.0169059		0		0		0
	60		0		0		0		0		0.09665		0		0		0
	61		0		0		0		0		0		0		0		0
	62		0		0		0		0		0		0		0		0
	63		0		0		0		0		0		0		0		0
	64		0		0		0		0		0		0		0		0
	65		0		0		0		0		0		0		0		0
	66		0		0		0		0		0		0		0		0
	67		0		0		0		0		0		0		0		0
	68		0		0		0		0		0		0		0		0
	69		0		0		0		0		0		0		0		0
	70		0		0		0		0		0		0		0		0
	71		0		0		0		0		0		0		0		0
	72		0		0		0		0		0		0		0		0
	73		0		0		0		0		0		0		0		0
	74		0		0		0		0		0		0		0		0
	75		0		0		0		0		0		0		0		0
	76		0		0		0		0		0		0		0		0
	77		0		0		0		0		0		0		0		0
	78		0		0		0		0		0		0		0		0
	79		0		0		0		0		0		0		0		0
	80		0		0		0		0		0		0		0		0
	81		0		0		0		0		0		0		0		0
	82		0		0		0		0		0		0		0		0
	83		0		0		0		0		0		0		0		0
	84		0		0		0		0		0		0		0		0
	85		0		0		0		0		0		0		0		0
	86		0		0		0		0		0		0		0		0
	87		0		0		0		0		0		0		0		0
	88		0		0		0		0		0		0		0		0
	89		0		0		0		0		0		0		0		0
	90		0		0		0		0		0		0		0		0
	91		0		0		0		0		0		0		0		0
	92		0		0		0		0		0		0		0		0
	93		0		0		0		0		0		0		0		0
	94		0		0		0		0		0		0		0		0
	95		0		0		0		0		0		0		0		0
	96		0		0		0		0		0		0		0		0
	97		0		0		0		0		0		0		0		0
	98		0		0		0		0		0		0		0		0
	99		0		0		0		0		0		0		0		0
	100		0		0		0		0		0		0		0		0
	101		0		0		0		0		0		0		0		0
	102		0		0		0		0		0		0		0		0
	103		0		0		0		0		0		0		0		0
	104		0		0		0		0		0		0		0		0
	105		0		0		0		0		0		0		0		0
	106		0		0		0		0		0		0		0		0
	107		0		0		0		0		0		0		0		0
	108		0		0		0		0		0		0		0		0
	109		0		0		0		0		0		0		0		0
	110		0		0		0		0		0		0		0		0
	111		0		0		0		0		0		0		0		0
	112		0		0		0		0		0		0		0		0
	113		0		0		0		0		0		0		0		0
	114		0		0		0		0		0		0		0		0
	115		0		0		0		0		0		0		0		0
	116		0		0		0		0		0		0		0		0
	117		0		0		0		0		0		0		0		0
	118		0		0		0		0		0		0		0		0
	119		0		0		0		0		0		0		0		0
	120		0		0		0		0		0		0		0		0
	121		0		0		0		0		0		0		0		0
	122		0		0		0		0		0		0		0		0
	123		0		0		0		0		0		0		0		0
	124		0		0		0		0		0		0		0		0
	125		0		0		0		0		0		0		0		0
	126		0		0		0		0		0		0		0		0
	127		0		0		0		0		0		0		0		0
	128		0		0		0		0		0		0		0		0
	129		0		0		0		0		0		0		0		0
	130		0		0		0		0		0		0		0		0
	131		0		0		0		0		0		0		0		0
	132		0		0		0		0		0		0		0		0
	133		0		0		0		0		0		0		0		0
	134		0		0		0		0		0		0		0		0
	135		0		0		0		0		0		0		0		0
	136		0		0		0		0		0		0		0		0
	137		0		0		0		0		0		0		0		0
	138		0		0		0		0		0		0		0		0
	139		0		0		0		0		0		0		0		0
	140		0		0		0		0		0		0		0		0
	141		0		0		0		0		0		0		0		0
	142		0		0		0		0		0		0		0		0
	143		0		0		0		0		0		0		0		0
	144		0		0		0		0		0		0		0		0
	145		0		0		0		0		0		0		0		0
	146		0		0		0		0		0		0		0		0
	147		0		0		0		0		0		0		0		0
	148		0		0		0		0		0		0		0		0
	149		0		0		0		0		0		0		0		0
	150		0		0		0		0		0		0		0		0
	151		0		0		0		0		0		0		0		0
	152		0		0		0		0		0		0		0		0
	153		0		0		0		0		0		0		0		0
	154		0		0		0		0		0		0		0		0
	155		0		0		0		0		0		0		0		0
	156		0		0		0		0		0		0		0		0
	157		0		0		0		0		0		0		0		0
	158		0		0		0		0		0		0		0		0
	159		0		0		0		0		0		0		0		0
	160		0		0		0		0		0		0		0		0
	161		0		0		0		0		0		0		0		0
	162		0		0		0		0		0		0		0		0
	163		0		0		0		0		0		0		0		0
	164		0		0		0		0		0		0		0		0
	165		0		0		0		0		0		0		0		0
	166		0		0		0		0		0		0		0		0
	167		0		0		0		0		0		0		0		0
	168		0		0		0		0		0		0		0		0
	169		0		0		0		0		0		0		0		0
	170		0		0		0		0		0		0		0		0
	171		0		0		0		0		0		0		0		0
	172		0		0		0		0		0		0		0		0
	173		0		0		0		0		0		0		0		0
	174		0		0		0		0		0		0		0		0
	175		0		0		0		0		0		0		0		0
	176		0		0		0		0		0		0		0		0
	177		0		0		0		0		0		0		0		0
	178		0		0		0		0		0		0		0		0
	179		0		0		0		0		0		0		0		0
	180		0		0		0		0		0		0		0		0
	Max		1.00314		0.892364		0.504909		0.395259		0.163636		1.10836		0.906818		0.797364
