# Supplementary material for: ASIC1a is required for neuronal activation via low-intensity ultrasound stimulation in mouse brain
Source: eLife. 2021 Sep 27;10:e61660. doi: 10.7554/eLife.61660 (PMC8510583; doi:10.7554/eLife.61660)
Supplement: Figure 4—source data 4. [file elife-61660-fig4-data4.xlsx]

## Sheet: AUC data
			Control
		Time(s)	Control				2nM					4nM					10nM
		1~10	0.545151	0.647325	0.775507	0.611735	0.698795	0.602615	0.638946	0.752929	0.908608	0.502764	0.392496	0.835923	0.470992	0.560052	0.599278	0.840108	0.72795	0.513134	0.468806
		11~20	0.617507	0.64298	0.753066	0.606279	0.751729	0.718855	0.757156	0.760488	0.903482	0.387463	0.302865	0.947943	0.268535	0.445672	0.60773	0.770756	0.744557	0.418809	0.275849
		21~30	0.730057	0.800746	0.763287	0.648895	2.52256	1.50691	1.60304	1.67552	1.50725	0.364138	0.30054	1.28728	0.224833	1.24804	0.288212	0.824316	0.929845	0.478372	0.187198
		31~40	3.78699	4.34897	0.82626	0.610471	1.59947	1.96547	1.87559	1.59947	2.59836	1.44569	1.20256	1.56368	0.216556	1.95002	0.164045	0.983971	1.3146	1.50299	1.31309
		41~50	4.06863	3.74105	1.2606	1.16155	1.54129	1.49601	1.66632	3.38921	1.49601	2.06232	2.3691	1.4062	0.483777	2.02798	1.02495	1.11007	1.84135	1.27675	1.19654
		51~60	3.43136	2.01407	2.03322	2.69849	1.55646	1.36257	1.5918	1.79748	2.38389	1.47413	1.80155	0.949345	1.58839	1.74138	2.12702	1.32703	1.82724	0.844453	0.585425

## Sheet: Control without treatment
			Control before adding PcTx1
				time(s)
				0		0.060504		0.059113		0.04918		0.062687
				1		0.045815		0.051124		0.085246		0.058277
				2		0.065435		0.061049		0.088636		0.065853
				3		0.058824		0.070402		0.092142		0.060081
				4		0.045815		0.054777		0.085246		0.061731
				5		0.057171		0.076729		0.051913		0.049044
				6		0.042824		0.074835		0.071687		0.061731
				7		0.057099		0.066257		0.095772		0.071473
				8		0.057099		0.076355		0.051913		0.053731
				9		0.055405		0.053558		0.099532		0.073244
				10		0.058824		0.065366		0.05766		0.050453
				11		0.062363		0.064255		0.081674		0.062065
				12		0.064181		0.062069		0.051913		0.070398
				13		0.058824		0.051258		0.078228		0.053731
				14		0.046324		0.067625		0.081674		0.060343
				15		0.071786		0.066489		0.05766		0.062427
				16		0.058824		0.068773		0.081674		0.060628
				17		0.071786		0.062069		0.063817		0.048647
				18		0.049733		0.065459		0.10343		0.077869
				19		0.066371		0.066614		0.08895		0.053731
				20		0.075805		0.071371		0.070431		0.062427
				21		0.064431		0.075087		0.067064		0.064258
				22		0.0493		0.075087		0.073925		0.08382
				23		0.0493		0.063252		0.070431		0.085874
				24		0.062707		0.075087		0.077554		0.055566
				25		0.078824		0.075484		0.096784		0.037942
				26		0.093517		0.070658		0.081324		0.069948
				27		0.068824		0.087069		0.077554		0.060939
				28		0.10882		0.095835		0.077554		0.062822
				29		0.075318		0.092332		0.068919		0.068685
				30		0.082228		0.11034		0.073925		0.055654
				31		0.1117		0.14778		0.065246		0.073915
				32		0.24118		0.22243		0.085246		0.057435
				33		0.41652		0.43899		0.068919		0.048176
				34		0.49712		0.52404		0.089328		0.063255
				35		0.47107		0.52874		0.068919		0.077032
				36		0.46299		0.51424		0.085246		0.04981
				37		0.45066		0.58934		0.076735		0.057615
				38		0.43025		0.54864		0.098012		0.04981
				39		0.45066		0.5335		0.10264		0.073731
				40		0.42745		0.49221		0.098012		0.063731
				41		0.47107		0.45111		0.085246		0.075954
				42		0.42745		0.44874		0.094548		0.065853
				43		0.42745		0.4335		0.12915		0.065853
				44		0.40784		0.40637		0.14106		0.072481
				45		0.42745		0.37972		0.094548		0.077136
				46		0.38824		0.35619		0.13525		0.08531
				47		0.38824		0.31151		0.1484		0.1181
				48		0.39729		0.29365		0.15552		0.18706
				49		0.34939		0.28312		0.14239		0.21737
				50		0.34097		0.26207		0.17096		0.32914
				51		0.37668		0.26003		0.19953		0.30373
				52		0.35882		0.231		0.19953		0.3204
				53		0.34031		0.21445		0.24888		0.29635
				54		0.36791		0.21113		0.18828		0.30373
				55		0.36826		0.18639		0.17096		0.25373
				56		0.33155		0.17786		0.23819		0.24767
				57		0.31496		0.1718		0.18828		0.24179
				58		0.31337		0.17511		0.17936		0.22138
				59		0.34031		0.17511		0.20878		0.22296
				60		0.29742		0.16031		0.25191		0.24436

## Sheet: PcTx1-2nM
			Control PcTx1 2nM
				time(s)
				0		0.079412		0.076119		0.088235		0.080556		0.095122
				1		0.072132		0.053157		0.062774		0.078704		0.099036
				2		0.074706		0.076356		0.059743		0.086547		0.098562
				3		0.082747		0.068542		0.063959		0.082037		0.10272
				4		0.062129		0.060483		0.056413		0.069463		0.093838
				5		0.070025		0.060483		0.072806		0.062037		0.084715
				6		0.070025		0.048195		0.082253		0.067139		0.08068
				7		0.064706		0.051896		0.056413		0.088633		0.097493
				8		0.045475		0.055721		0.06998		0.070102		0.061833
				9		0.07607		0.055721		0.035497		0.070102		0.08886
				10		0.082148		0.068002		0.06998		0.075773		0.10662
				11		0.073133		0.072388		0.044118		0.042806		0.083604
				12		0.082148		0.072388		0.048663		0.064784		0.082397
				13		0.088515		0.072388		0.061975		0.070464		0.082397
				14		0.058892		0.072388		0.06998		0.064784		0.076556
				15		0.088515		0.090245		0.085027		0.082625		0.086872
				16		0.05		0.058752		0.10181		0.062037		0.096231
				17		0.058608		0.053157		0.10181		0.095988		0.10113
				18		0.077206		0.091619		0.068627		0.10318		0.10617
				19		0.094706		0.057682		0.10024		0.081268		0.0845
				20		0.077864		0.087694		0.079832		0.10933		0.10063
				21		0.07498		0.072388		0.09199		0.1037		0.11138
				22		0.07498		0.072388		0.083007		0.13088		0.10008
				23		0.10042		0.11784		0.12745		0.13022		0.10563
				24		0.094118		0.10146		0.14295		0.18909		0.11138
				25		0.14257		0.14739		0.13558		0.18909		0.14169
				26		0.14804		0.22239		0.16912		0.18046		0.13654
				27		0.18971		0.19382		0.22269		0.198		0.15805
				28		0.17185		0.21633		0.22269		0.21204		0.20358
				29		0.21093		0.20474		0.26471		0.19386		0.24317
				30		0.19206		0.22864		0.20588		0.18704		0.29087
				31		0.17834		0.24663		0.24866		0.21588		0.43519
				32		0.1732		0.22864		0.23162		0.17742		0.36138
				33		0.1732		0.19739		0.23162		0.18459		0.43519
				34		0.13546		0.19739		0.27799		0.17742		0.37805
				35		0.16086		0.17533		0.24573		0.20419		0.3336
				36		0.18725		0.18602		0.23162		0.17742		0.37805
				37		0.14804		0.17533		0.20037		0.18459		0.40662
				38		0.12843		0.17533		0.20037		0.18459		0.34948
				39		0.14804		0.18602		0.16912		0.17204		0.36628
				40		0.14124		0.16614		0.20037		0.20787		0.36628
				41		0.14124		0.13489		0.23162		0.15898		0.36628
				42		0.14124		0.13489		0.16912		0.17374		0.34948
				43		0.15513		0.13489		0.18121		0.1662		0.32091
				44		0.15513		0.16614		0.18121		0.1662		0.32091
				45		0.16253		0.14497		0.21347		0.15246		0.34948
				46		0.14804		0.13489		0.19412		0.1816		0.33687
				47		0.15561		0.15572		0.14896		0.16759		0.27805
				48		0.15561		0.16722		0.16078		0.1816		0.38411
				49		0.17834		0.15572		0.17343		0.13022		0.35381
				50		0.15561		0.16722		0.16078		0.16759		0.29233
				51		0.1868		0.17953		0.17343		0.16918		0.30746
				52		0.14029		0.12239		0.20791		0.17789		0.26376
				53		0.17185		0.16722		0.12745		0.16087		0.29233
				54		0.14029		0.14382		0.16078		0.1535		0.2932
				55		0.18056		0.14382		0.16078		0.18704		0.2629
				56		0.13178		0.14382		0.19412		0.18046		0.2932
				57		0.16471		0.14382		0.13895		0.19042		0.24864
				58		0.16471		0.072388		0.13895		0.23309		0.2629
				59		0.13178		0.1081		0.15126		0.17101		0.2629
				60		0.13178		0.1081		0.11555		0.18046		0.2629

## Sheet: PcTx1-4nM
			Control PcTx1 4nM
				time(s)
				0		0.075		0.043966		0.076271		0.055172		0.076471
				1		0.05473		0.036544		0.063413		0.0595		0.056863
				2		0.075		0.037765		0.10775		0.055172		0.061569
				3		0.044178		0.022414		0.072034		0.039939		0.066467
				4		0.067857		0.042868		0.099812		0.047735		0.056863
				5		0.053571		0.042868		0.089891		0.037931		0.046058
				6		0.036268		0.045562		0.086185		0.054191		0.066467
				7		0.042391		0.046947		0.091265		0.035821		0.050735
				8		0.033955		0.027043		0.072034		0.050752		0.046058
				9		0.037121		0.049795		0.076936		0.042317		0.048841
				10		0.040385		0.037414		0.076936		0.040096		0.043791
				11		0.033955		0.026127		0.096544		0.037931		0.034335
				12		0.052273		0.034669		0.076936		0.037931		0.082438
				13		0.028125		0.027414		0.08734		0.053083		0.017221
				14		0.028125		0.021125		0.08734		0.031264		0.048841
				15		0.038115		0.022414		0.072034		0.0045977		0.043791
				16		0.021721		0.026446		0.088701		0.021949		0.0076151
				17		0.041667		0.029282		0.12638		0.0082507		0.035854
				18		0.054508		0.032245		0.11092		0.018323		0.059664
				19		0.049138		0.045141		0.1011		0.016192		0.064812
				20		0.039286		0.03859		0.12436		0.037931		0.058411
				21		0.057143		0.052176		0.12436		0.02278		0.058411
				22		0.013679		0.016461		0.12203		0.029995		0.099346
				23		0.051415		0.019365		0.13782		0.029995		0.071569
				24		0.036538		0.020871		0.085192		0.0024119		0.063993
				25		0.040686		0.025619		0.11933		0.035199		0.10282
				26		0.025		0.042151		0.099812		0.0068576		0.1549
				27		0.040686		0.027284		0.12759		0.029159		0.16772
				28		0.029082		0.028993		0.14556		0.014122		0.16772
				29		0.037766		0.0344		0.16489		0.034901		0.22157
				30		0.025		0.027849		0.19703		0.000894		0.22157
				31		0.034302		0.027849		0.14556		0.037931		0.20618
				32		0.057558		0.031742		0.13453		0.031264		0.19657
				33		0.1		0.05126		0.15537		0.017098		0.27611
				34		0.10705		0.069828		0.15537		0.017098		0.25635
				35		0.17794		0.082599		0.12203		0.017098		0.16939
				36		0.2		0.13654		0.16686		0.023438		0.19657
				37		0.16983		0.17648		0.21489		0.007628		0.12592
				38		0.23879		0.20511		0.15537		0.023438		0.13975
				39		0.23879		0.25852		0.14346		0.034055		0.20252
				40		0.21786		0.29741		0.14346		0.014122		0.13975
				41		0.19537		0.24027		0.13238		0.017606		0.23066
				42		0.21786		0.22174		0.14346		0.021264		0.20252
				43		0.23241		0.23075		0.15537		0.029159		0.18999
				44		0.25357		0.25852		0.15537		0.055475		0.24262
				45		0.25357		0.23075		0.14346		0.071264		0.22157
				46		0.19537		0.24027		0.15537		0.014122		0.17157
				47		0.19537		0.26884		0.15537		0.018323		0.18999
				48		0.19537		0.18313		0.11833		0.053083		0.17157
				49		0.13534		0.24027		0.091265		0.11264		0.24262
				50		0.15833		0.2117		0.16819		0.16756		0.18999
				51		0.15833		0.18313		0.10203		0.11126		0.18999
				52		0.19537		0.2117		0.052803		0.16293		0.1549
				53		0.15833		0.18313		0.1137		0.13213		0.21046
				54		0.084259		0.16768		0.052803		0.18945		0.13736
				55		0.17115		0.14741		0.10203		0.15698		0.1549
				56		0.1213		0.2117		0.10203		0.14399		0.17451
				57		0.13269		0.14741		0.082903		0.2046		0.19657
				58		0.17115		0.15456		0.10775		0.14399		0.1549
				59		0.094231		0.2117		0.10775		0.15698		0.17451
				60		0.2163		0.15456		0.082903		0.2046		0.19657

## Sheet: PcTx1-10nM
		Control PcTx1 10nM
				time(s)
				0		0.054545		0.088525		0.068		0.06087		0.053571
				1		0.057912		0.088525		0.08077		0.057971		0.050439
				2		0.068806		0.067636		0.066685		0.073356		0.035714
				3		0.068806		0.072131		0.066685		0.057971		0.038636
				4		0.049198		0.052063		0.052601		0.06432		0.038636
				5		0.068806		0.091688		0.08771		0.054692		0.023148
				6		0.049198		0.11487		0.073217		0.054692		0.048077
				7		0.052727		0.074144		0.080139		0.041304		0.051471
				8		0.064217		0.10826		0.056718		0.024638		0.015
				9		0.060227		0.084352		0.083758		0.044412		0.017857
				10		0.064217		0.084352		0.091333		0.018685		0.017857
				11		0.060227		0.097014		0.087487		0.050953		0.015
				12		0.081061		0.079157		0.072103		0.03341		0.035
				13		0.060227		0.084352		0.063556		0.03341		0.017857
				14		0.064217		0.076461		0.079429		0.039789		0
				15		0.054545		0.076461		0.074667		0.057971		0
				16		0.072727		0.081904		0.070842		0.04665		0.0083333
				17		0.054545		0.08756		0.058		0.054049		0.027174
				18		0.08203		0.067952		0.091333		0.034442		0.030556
				19		0.028283		0.048345		0.058		0.037971		0.014535
				20		0.035518		0.058749		0.086947		0.041644		0.014535
				21		0.063203		0.064276		0.073476		0.066304		0.021341
				22		0.043459		0.064276		0.082074		0.028184		0.025
				23		0.039394		0.070038		0.082074		0.057971		0
				24		0.019069		0.10455		0.11056		0.013527		0.032895
				25		0.019069		0.091315		0.096235		0.039789		0.069444
				26		0.030622		0.09779		0.10664		0.020762		0
				27		0		0.072512		0.086231		0.077483		0
				28		0.0009324		0.095768		0.10133		0.063099		0
				29		0.039394		0.079157		0.096652		0.04716		0
				30		0.030622		0.11052		0.1022		0.086542		0.0625
				31		0		0.11844		0.12394		0.051519		0.0625
				32		0		0.061735		0.1204		0.14369		0.023148
				33		0		0.10113		0.13679		0.1913		0.115
				34		0		0.093443		0.14366		0.1913		0.10227
				35		0.024242		0.10923		0.12705		0.16566		0.19079
				36		0.0017595		0.10923		0.091333		0.20412		0.24342
				37		0.034018		0.11777		0.13402		0.13797		0.175
				38		0.072727		0.079157		0.15712		0.17797		0.175
				39		0.010658		0.098998		0.16566		0.1272		0.13816
				40		0.010658		0.079157		0.12705		0.13797		0.1131
				41		0.015584		0.079157		0.18419		0.17797		0.13816
				42		0.010658		0.13719		0.21276		0.13797		0.085526
				43		0.081061		0.08756		0.18419		0.13797		0.19079
				44		0.032727		0.11602		0.16486		0.14964		0.13816
				45		0.1336		0.11602		0.17467		0.11884		0.13816
				46		0.14545		0.12678		0.18508		0.17615		0.085526
				47		0.11082		0.074693		0.19617		0.039789		0.085526
				48		0.22273		0.12678		0.16391		0.1307		0.13816
				49		0.17273		0.14828		0.208		0.11884		0.097222
				50		0.18852		0.11602		0.208		0.039789		0.085526
				51		0.15051		0.10379		0.17467		0.096066		0.085526
				52		0.26162		0.15059		0.16391		0.1307		0.085526
				53		0.20606		0.15059		0.22064		0.075362		0.085526
				54		0.20606		0.12678		0.19848		0.048447		0.032895
				55		0.20606		0.12678		0.19848		0.14369		0.041667
				56		0.22567		0.16381		0.18616		0.057971		0.041667
				57		0.24773		0.15344		0.16276		0.068497		0.041667
				58		0.20606		0.12678		0.2117		0.048447		0.041667
				59		0.24773		0.089739		0.10059		0.12113		0
				60		0.15051		0.15344		0.2117		0.068497		0.041667
