# Supplementary material for: ASIC1a is required for neuronal activation via low-intensity ultrasound stimulation in mouse brain
Source: eLife. 2021 Sep 27;10:e61660. doi: 10.7554/eLife.61660 (PMC8510583; doi:10.7554/eLife.61660)
Supplement: Figure 4—source data 5. [file elife-61660-fig4-data5.xlsx]

## Sheet: AUC data
			ASIC1a
		Time(s)	Control					2nM			4nM			10nM
		1~10	0.603535	0.676188	0.617641	0.596683	1.41766	0.225926	0.622232	0.678989	1.69462	1.1836	0.318232	0.301808	1.55675	0.455037
		11~20	2.78053	1.28191	2.89136	1.23526	2.27726	0.278018	0.763536	0.659394	1.23011	1.02683	0.19998	0.224793	1.66478	0.439812
		21~30	2.97504	2.13516	2.99108	2.1333	2.35412	0.631431	0.644731	0.6918	0.86463	0.797059	0.170427	0.171127	1.50093	0.719492
		31~40	3.06874	2.13233	3.17427	2.05376	2.11086	1.0035	0.555064	0.665838	0.245729	0.512592	0.154698	0.118059	0.811537	0.641433
		41~50	3.22318	2.21212	3.22158	2.1998	2.44174	0.889777	0.380238	0.587553	0.0457742	0.152313	0.0835648	0.0770711	0.188914	0.46252
		51~60	3.064	2.30867	3.31105	2.25046	2.26916	0.768975	0.28134	0.543264	0	0.011111	0.0423147	0.00832187	0.0162219	0.233048
			Control
		Time(s)	Control				2nM					4nM					10nM
		1~10	0.545151	0.647325	0.775507	0.611735	0.698795	0.602615	0.638946	0.752929	0.908608	0.502764	0.392496	0.835923	0.470992	0.560052	0.599278	0.840108	0.72795	0.513134	0.468806
		11~20	0.617507	0.64298	0.753066	0.606279	0.751729	0.718855	0.757156	0.760488	0.903482	0.387463	0.302865	0.947943	0.268535	0.445672	0.60773	0.770756	0.744557	0.418809	0.275849
		21~30	0.730057	0.800746	0.763287	0.648895	2.52256	1.50691	1.60304	1.67552	1.50725	0.364138	0.30054	1.28728	0.224833	1.24804	0.288212	0.824316	0.929845	0.478372	0.187198
		31~40	3.78699	4.34897	0.82626	0.610471	1.59947	1.96547	1.87559	1.59947	2.59836	1.44569	1.20256	1.56368	0.216556	1.95002	0.164045	0.983971	1.3146	1.50299	1.31309
		41~50	4.06863	3.74105	1.2606	1.16155	1.54129	1.49601	1.66632	3.38921	1.49601	2.06232	2.3691	1.4062	0.483777	2.02798	1.02495	1.11007	1.84135	1.27675	1.19654
		51~60	3.43136	2.01407	2.03322	2.69849	1.55646	1.36257	1.5918	1.79748	2.38389	1.47413	1.80155	0.949345	1.58839	1.74138	2.12702	1.32703	1.82724	0.844453	0.585425

## Sheet: ASIC1a before treatment
		ASIC1a before treatment
			time(s)
			0		0.049606		0.054545		0.047727		0.057447		0.11803
			1		0.044252		0.061503		0.050175		0.05175		0.13443
			2		0.049606		0.062471		0.053991		0.059328		0.11169
			3		0.054984		0.060227		0.055303		0.050315		0.12459
			4		0.059252		0.074855		0.059368		0.061488		0.15792
			5		0.056383		0.070588		0.051238		0.057818		0.14564
			6		0.056666		0.067322		0.06219		0.06136		0.14832
			7		0.066861		0.068379		0.068124		0.057818		0.15316
			8		0.073441		0.071622		0.071245		0.063632		0.15316
			9		0.075161		0.072727		0.077826		0.067177		0.15316
			10		0.084252		0.078442		0.088636		0.074546		0.15316
			11		0.096373		0.08203		0.10646		0.070926		0.15855
			12		0.13713		0.085745		0.17779		0.077496		0.17742
			13		0.31048		0.092239		0.32931		0.080243		0.19518
			14		0.34854		0.091477		0.35292		0.098834		0.21439
			15		0.34854		0.11776		0.37078		0.10709		0.22459
			16		0.35698		0.13701		0.33506		0.1216		0.25651
			17		0.34854		0.15734		0.35292		0.15521		0.25792
			18		0.3053		0.17111		0.34478		0.18739		0.32924
			19		0.33253		0.19751		0.31237		0.19003		0.25792
			20		0.30798		0.22094		0.32931		0.21834		0.25792
			21		0.29805		0.20016		0.31237		0.2189		0.25792
			22		0.30798		0.22408		0.32197		0.22239		0.25792
			23		0.29103		0.20901		0.28864		0.2287		0.25792
			24		0.28425		0.22135		0.29847		0.22518		0.24633
			25		0.3053		0.21818		0.28208		0.20576		0.21395
			26		0.29103		0.23053		0.29542		0.21249		0.24633
			27		0.29103		0.21218		0.28864		0.19605		0.22459
			28		0.3053		0.20606		0.30243		0.20259		0.19268
			29		0.29805		0.19705		0.28519		0.20909		0.23523
			30		0.29805		0.21218		0.30243		0.20596		0.18459
			31		0.31282		0.21532		0.30969		0.20259		0.21439
			32		0.29497		0.20606		0.31721		0.19929		0.21439
			33		0.31282		0.21235		0.29935		0.19269		0.18459
			34		0.31282		0.20292		0.325		0.20939		0.19398
			35		0.30243		0.21558		0.33506		0.21647		0.22459
			36		0.29497		0.20292		0.30682		0.20269		0.18292
			37		0.32062		0.20927		0.325		0.2028		0.21395
			38		0.29497		0.23273		0.31456		0.20616		0.22459
			39		0.31821		0.22273		0.33308		0.20638		0.24732
			40		0.31018		0.21273		0.31456		0.22465		0.2357
			41		0.31018		0.20936		0.31456		0.21333		0.24732
			42		0.30243		0.21273		0.31456		0.20291		0.22459
			43		0.31821		0.22273		0.31456		0.2208		0.25947
			44		0.31018		0.21967		0.3226		0.22465		0.2357
			45		0.33523		0.21616		0.33094		0.22859		0.25947
			46		0.32656		0.21293		0.3226		0.22551		0.25947
			47		0.31821		0.23062		0.33094		0.22151		0.23622
			48		0.33523		0.24229		0.3226		0.20687		0.24732
			49		0.34425		0.2201		0.33094		0.22642		0.23622
			50		0.33523		0.23832		0.32001		0.23377		0.23622
			51		0.2881		0.22055		0.33962		0.22642		0.23622
			52		0.32425		0.23142		0.33962		0.21079		0.23622
			53		0.29602		0.22055		0.33094		0.22228		0.23622
			54		0.31562		0.23536		0.33962		0.2231		0.21296
			55		0.29602		0.22828		0.33962		0.23501		0.23622
			56		0.30425		0.22104		0.32001		0.2189		0.22459
			57		0.31562		0.22438		0.32864		0.2231		0.22459
			58		0.30425		0.25204		0.32864		0.22846		0.21296
			59		0.30425		0.22905		0.32001		0.23181		0.22459
			60		0.29602		0.25368		0.32864		0.2274		0.21296

## Sheet: ASIC1a-PcTx1-2nM
		ASIC1a cells treated with 2nM PcTx1
				time(s)
				0		0.030769		0.065714		0.069231
				1		0.023857		0.065714		0.054148
				2		0.023857		0.069968		0.073756
				3		0.016701		0.063648		0.078462
				4		0.026419		0.05619		0.054148
				5		0.02555		0.072157		0.067628
				6		0.018295		0.072157		0.093781
				7		0.020798		0.056667		0.038462
				8		0.020798		0.056667		0.083359
				9		0.022545		0.066667		0.083359
				10		0.023443		0.01908		0.03454
				11		0.025293		0.072231		0.088462
				12		0.020042		0.098519		0.083359
				13		0.028205		0.098699		0.077592
				14		0.018205		0.068889		0.055853
				15		0.035732		0.074737		0.065734
				16		0.022942		0.080312		0.043007
				17		0.026031		0.070966		0.055853
				18		0.039316		0.079676		0.065734
				19		0.032856		0.074389		0.07102
				20		0.035348		0.071156		0.07102
				21		0.035348		0.058788		0.07102
				22		0.036639		0.060952		0.082364
				23		0.042129		0.065417		0.057974
				24		0.051493		0.070071		0.075304
				25		0.05864		0.064058		0.063462
				26		0.06883		0.064058		0.069231
				27		0.073366		0.071386		0.028938
				28		0.094872		0.06015		0.088462
				29		0.10062		0.065057		0.075304
				30		0.10364		0.058431		0.088462
				31		0.10678		0.070196		0.081705
				32		0.088919		0.072857		0.095604
				33		0.091841		0.049048		0.060684
				34		0.094872		0.041789		0.073756
				35		0.10468		0.059167		0.095604
				36		0.10128		0.059167		0.044344
				37		0.10468		0.049198		0.044344
				38		0.10468		0.051795		0.044344
				39		0.10821		0.044035		0.044344
				40		0.09147		0.057193		0.073756
				41		0.11571		0.035856		0.044344
				42		0.10821		0.033333		0.044344
				43		0.068205		0.038447		0.057212
				44		0.083761		0.041111		0.064268
				45		0.080379		0.049565		0.057212
				46		0.083761		0.037843		0.038462
				47		0.083761		0.032381		0.071795
				48		0.083761		0.035072		0.03201
				49		0.090996		0.023137		0.10513
				50		0.090996		0.049792		0.071795
				51		0.087296		0.031282		0.038462
				52		0.094872		0.037143		0.071795
				53		0.06774		0.031282		0.079841
				54		0.06774		0.018542		0.045358
				55		0.06774		0.043388		0.045358
				56		0.06774		0.026995		0.045358
				57		0.074547		0.010601		0.045358
				58		0.074547		0.03		0.052747
				59		0.078205		0.016158		0.052747
				60		0.0861		0.022105		0.060684

## Sheet: ASIC1a-PcTx1-4nM
			ASIC1a cells treated with 4nM PcTx1
					time(s)
					0		0.16744		0.12222		0.031915
					1		0.1907		0.13254		0.036643
					2		0.16744		0.10506		0.055967
					3		0.16744		0.14339		0.014421
					4		0.1907		0.11225		0.036643
					5		0.16744		0.10722		0.031915
					6		0.16744		0.12271		0.041811
					7		0.16744		0.12022		0.034228
					8		0.18073		0.11481		0.031915
					9		0.13311		0.12022		0.012488
					10		0.15692		0.088148		0.012488
					11		0.15692		0.11208		0.012488
					12		0.14419		0.11759		0.014421
					13		0.12093		0.12327		0.034228
					14		0.1093		0.11759		0.034228
					15		0.14589		0.10053		0.010638
					16		0.1093		0.081012		0.014421
					17		0.15692		0.091626		0.034228
					18		0.085493		0.091626		0.012488
					19		0.085493		0.097168		0.010638
					20		0.074419		0.10053		0.031915
					21		0.085493		0.097168		0.012488
					22		0.1343		0.11481		0.010638
					23		0.085493		0.073024		0.036643
					24		0.097107		0.093603		0.014421
					25		0.051163		0.0633		0.016441
					26		0.084302		0.068661		0.014421
					27		0.072717		0.058565		0.016441
					28		0.084302		0.07419		0.014421
					29		0.084302		0.07419		0.018555
					30		0.096482		0.058565		0
					31		0.0452		0.079894		0.016441
					32		0.023936		0.075471		0.016441
					33		0.0452		0.059077		0.018555
					34		0.023936		0.042684		0.016441
					35		0.019559		0.037395		0.018555
					36		0.0093023		0.031481		0
					37		0.030355		0.042684		0.02077
					38		0		0.053798		0.018555
					39		0		0.042401		0.018555
					40		0		0.036849		0.02077
					41		0		0.054101		0.025532
					42		0.041735		0.01306		0.02077
					43		0		0.01306		0.00053191
					44		0.0040392		0.01306		0.023093
					45		0		0.018386		0
					46		0		0		0
					47		0		0.011111		0.00053191
					48		0		0.011111		0
					49		0		0		0.002455
					50		0		0		0.00053191
					51		0		0.011111		0.0044793
					52		0		0		0.006613
					53		0		0		0.006613
					54		0		0		0.006613
					55		0		0		0
					56		0		0		0.0088652
					57		0		0		0.0088652
					58		0		0		0
					59		0		0		0
					60		0		0		0

## Sheet: ASIC1a-PcTx1-10nM
			ASIC1a cells treated with 10nM PcTx1
					time(s)
					0		0.041379		0.17053		0.049485
					1		0.036453		0.17819		0.056253
					2		0.036453		0.16125		0.051203
					3		0.036453		0.16125		0.031905
					4		0.026601		0.17353		0.052957
					5		0.021675		0.16732		0.058449
					6		0.030999		0.14466		0.038382
					7		0.02466		0.15645		0.03671
					8		0.027801		0.13471		0.03671
					9		0.025141		0.12384		0.049371
					10		0.029764		0.14057		0.03671
					11		0.02047		0.12899		0.038382
					12		0.025789		0.13402		0.049371
					13		0.024995		0.1639		0.045456
					14		0.020115		0.15766		0.041839
					15		0.021426		0.17187		0.047327
					16		0.030616		0.16837		0.033961
					17		0.019727		0.17711		0.047327
					18		0.013913		0.19704		0.051203
					19		0.023209		0.19185		0.043073
					20		0.019302		0.20737		0.047036
					21		0.020013		0.16621		0.055589
					22		0.020732		0.18105		0.055589
					23		0.011043		0.14641		0.057869
					24		0.021095		0.17353		0.067635
					25		0.014559		0.15339		0.072942
					26		0.01529		0.16055		0.090418
					27		0.013037		0.14057		0.078566
					28		0.021504		0.13457		0.090418
					29		0.015336		0.08991		0.081506
					30		0.017734		0.10211		0.090885
					31		0.01939		0.12159		0.072036
					32		0.007152		0.10843		0.084536
					33		0.017085		0.10211		0.053767
					34		0.0034483		0.076464		0.046301
					35		0.011975		0.082625		0.069151
					36		0.014559		0.076464		0.059139
					37		0.0074483		0.057801		0.072036
					38		0.010006		0.057801		0.064864
					39		0.011782		0.063644		0.053767
					40		0.012692		0.027105		0.040786
					41		0.015517		0.027105		0.045826
					42		0.0087114		0.039605		0.061955
					43		0.010591		0.0095127		0.043266
					44		0.010591		0.038003		0.048471
					45		0		0.01769		0.048471
					46		0.0043657		0.01769		0.048471
					47		0.010244		0.0047027		0.032077
					48		0.0092175		0.01		0.054028
					49		0.0014875		0.01		0.039708
					50		0		0.0021053		0.039708
					51		0		0		0.037078
					52		0		0.0021053		0.037078
					53		0		0		0.034536
					54		0		0.013064		0.020129
					55		0.00022247		0		0.022467
					56		0		0		0.027393
					57		0		0		0.0095361
					58		0		0		0.0095361
					59		0.0080994		0		0.0095361
					60		0		0		0.011809
