# Supplementary material for: ASIC1a is required for neuronal activation via low-intensity ultrasound stimulation in mouse brain
Source: eLife. 2021 Sep 27;10:e61660. doi: 10.7554/eLife.61660 (PMC8510583; doi:10.7554/eLife.61660)
Supplement: Figure 5—source data 1. [file elife-61660-fig5-data1.xlsx]

## Sheet: 工作表1
								DCX+ cells in DG	Control	Day 4	Day7
								1	39	102	88.5
								2	48	106	91
								3	47.5	107	129
								4	46	130.5	156.5
								avg	45.125	111.375	116.25
								stdev	4.17083	12.9317	32.6101
