# Supplementary material for: ASIC1a is required for neuronal activation via low-intensity ultrasound stimulation in mouse brain
Source: eLife. 2021 Sep 27;10:e61660. doi: 10.7554/eLife.61660 (PMC8510583; doi:10.7554/eLife.61660)
Supplement: Figure 6—source data 1. [file elife-61660-fig6-data1.xlsx]

## Sheet: pERK quantification (Fig7)
Total cell count of p-ERK positive staining cells in the indicated brain regions (each number is collected from the brain slices of one mouse)
	Cortex							Hippocampus							Amygdala
	Wildtype	Wildtype	ASIC1a-/-	ASIC1a-/-	ASIC3-/-	ASIC3-/-		Wildtype	Wildtype	ASIC1a-/-	ASIC1a-/-	ASIC3-/-	ASIC3-/-		Wildtype	Wildtype	ASIC1a-/-	ASIC1a-/-	ASIC3-/-	ASIC3-/-
	Control	Ultrasound	Control	Ultrasound	Control	Ultrasound		Control	Ultrasound	Control	Ultrasound	Control	Ultrasound		Control	Ultrasound	Control	Ultrasound	Control	Ultrasound
	52	127	113	94	9	92		2	17	27	198	2	66		667	668	56	636	45	257
	165	58	8	51	15	196		4	346	2	64	38	87		125	479	434	569	152	323
	41	294	114	73	22	201		12	46	0	32	16	149		44	724	308	434	178	318
	10	76	147	32	0	147		65	41	0	86	0	140		43	284	318	355	125	133
	59	4	213	61	0	68		9	87	0	114	0	263		188	167	381	363	164	251
	9	167		160				16	151		0				109	450		115
	13	188		69				82	152		0				173	353		238
	36	212		73				127	236		0				56	124		272
	20	135		207				22	277						48	917		334
	1	154						54							29	907
	24							12							466	1149
	0														706	1068
Average	35.8333	141.5	119	91.1111	9.2	140.8	Average	36.8182	150.333	5.8	61.75	11.2	141	Average	221.167	607.5	299.4	368.444	132.8	256.4
Stdev	45.031	82.7422	74.1654	56.2793	9.57601	59.9808	Stdev	40.2637	115.271	11.8828	69.9096	16.4073	76.6322	Stdev	247.964	349.878	145.292	161.266	52.8081	76.6277
