# Supplementary material for: ASIC1a is required for neuronal activation via low-intensity ultrasound stimulation in mouse brain
Source: eLife journal article supplement (doi:10.7554/elife.61660), 2021-09-27
Supplement: supp [file elife_poa_e61660_Figure_2_source_data_5.xlsx]

## Sheet: 900mVpp 3s PcTx1-Figure 2H
Time	Control	PcTx1-50nM	Stdev control													Average	Stdev
0.5	-0.433333	0	0.465475								0	0	0	0	0	0	0
1	-0.2	0.29	0.298142								0.857143	0.25	0.2	0	0.142857	0.29	0.330568
1.5	-0.24	0.261905	0.277288								0	1	0	0.166667	0.142857	0.261905	0.419886
2	-0.126667	0.597619	0.57465								0.428571	2.25	0	0.166667	0.142857	0.597619	0.936565
2.5	-0.233333	-0.0785714	0.401386								-0.142857	-0.25	0	0	0	-0.0785714	0.114062
3	-0.653333	-0.0571429	0.313227								-0.142857	0	0	0	-0.142857	-0.0571429	0.0782461
3.5	-0.5	0.01	0.333333								-0.142857	0.25	-0.2	0	0.142857	0.01	0.188955
4	-0.346667	0.135714	0.20629								-0.285714	1.25	0	0	-0.285714	0.135714	0.639076
4.5	1.11022e-17	0.114286	0.62361								-0.714286	1	0	0	0.285714	0.114286	0.617764
5	0.353333	-0.413333	0.967126								-0.714286	-0.5	-0.4	-0.166667	-0.285714	-0.413333	0.209399
5.5	-0.166667	-0.123333	0.763763								-0.285714	-0.25	-0.2	-0.166667	0.285714	-0.123333	0.233178
6	-0.2	-0.320476	0.397911								-0.428571	-0.75	-0.4	-0.166667	0.142857	-0.320476	0.331977
6.5	-0.48	-0.11619	0.356371								0.428571	-0.5	-0.2	-0.166667	-0.142857	-0.11619	0.337031
7	-0.393333	-0.358095	0.490125								-0.571429	0	-0.6	-0.333333	-0.285714	-0.358095	0.243984
7.5	-0.533333	-0.534762	0.431406								-0.428571	-0.75	-0.4	-0.666667	-0.428571	-0.534762	0.161586
8	-0.54	-0.477619	0.424526								-0.285714	-0.75	-0.4	-0.666667	-0.285714	-0.477619	0.217721
8.5	-0.346667	-0.512857	0.425963								-0.571429	-0.75	-0.6	-0.5	-0.142857	-0.512857	0.226012
9	-0.466667	-0.389524	0.361325								-0.571429	-0.5	-0.4	-0.333333	-0.142857	-0.389524	0.165383
9.5	-0.166667	-0.422857	0.440959								-0.428571	-0.5	-0.4	-0.5	-0.285714	-0.422857	0.08841
10	-0.28	-0.574762	0.30786								-0.714286	-0.75	-0.6	-0.666667	-0.142857	-0.574762	0.247891
10.5	-0.313333	-0.208571	0.651323								-0.857143	1	-0.4	-0.5	-0.285714	-0.208571	0.708664
11	-0.44	-0.479524	0.29571								-0.142857	-0.75	-0.6	-0.333333	-0.571429	-0.479524	0.240226
11.5	0.406667	-0.327619	1.04839								-0.285714	-0.5	-0.4	-0.166667	-0.285714	-0.327619	0.126858
12	3.20667	-0.24381	1.90823								-0.285714	-0.5	-0.6	0.166667	0	-0.24381	0.324883
12.5	5.00667	-0.0847619	2.36295								0.142857	-0.5	-0.4	0.333333	0	-0.0847619	0.355527
13	6.29333	0.23381	2.8416								-0.142857	1.25	-0.2	-0.166667	0.428571	0.23381	0.624705
13.5	5.66	0.638095	1.45304								0.428571	2	0	0.333333	0.428571	0.638095	0.781446
14	5.65333	0.882857	2.46775								0.285714	3	0.2	0.5	0.428571	0.882857	1.18934
14.5	4.87333	0.997143	1.4423								0.714286	2.5	0.2	1	0.571429	0.997143	0.888153
15	5.76667	1.12571	1.09036								1.57143	2.5	0.2	0.5	0.857143	1.12571	0.923027
15.5	6.88667	0.687143	2.16097								0.714286	1.25	0.4	0.5	0.571429	0.687143	0.334816
16	6.84667	1.08429	2.7092								2.28571	0.75	0.6	0.5	1.28571	1.08429	0.73683
16.5	6.44	0.648571	2.55847								0.571429	0.5	0.6	1	0.571429	0.648571	0.199898
17	6.82	0.356667	3.68342								0.285714	0.25	0.2	0.333333	0.714286	0.356667	0.205786
17.5	6.82	0.602857	1.73231								0.142857	1	0.8	0.5	0.571429	0.602857	0.323943
18	6.73333	0.535714	3.218								0.142857	1.75	0	0.5	0.285714	0.535714	0.70349
18.5	6.26667	0.504286	3.8848								0.142857	1.75	0.2	0	0.428571	0.504286	0.713278
19	5.80667	0.371429	3.30289								0.571429	0.5	0	0.5	0.285714	0.371429	0.233649
19.5	6.36667	0.595238	3.50079								0.428571	1.5	0	0.333333	0.714286	0.595238	0.566447
20	5.94	0.261429	2.59405								0.571429	0.25	0.2	0	0.285714	0.261429	0.205511
20.5	6.16	0.242857	2.80579								-0.142857	0.5	0	0	0.857143	0.242857	0.421368
21	5.39333	0.0457143	2.43269								0.142857	0	-0.2	0	0.285714	0.0457143	0.181378
21.5	5.24	0.0809524	2.742								0.571429	-0.5	0	0.333333	0	0.0809524	0.404622
22	5.42	-0.0761905	2.50971								0.142857	-0.5	0	-0.166667	0.142857	-0.0761905	0.269058
22.5	5.49333	0.26	2.59598								0.857143	0.5	-0.2	0	0.142857	0.26	0.420447
23	5	-0.132381	3.66477								-0.285714	0.5	-0.4	-0.333333	-0.142857	-0.132381	0.365899
23.5	4.50667	-0.372381	1.85748								-0.428571	-0.5	-0.6	-0.333333	0	-0.372381	0.229917
24	4.54	-0.320476	2.13365								-0.142857	-0.75	-0.4	-0.166667	-0.142857	-0.320476	0.263424
24.5	4.86	-0.367619	2.77052								-0.428571	-0.5	-0.6	-0.166667	-0.142857	-0.367619	0.203802
25	4.34	-0.513333	1.95653								-0.714286	-0.5	-0.4	-0.666667	-0.285714	-0.513333	0.179392
25.5	3.86	-0.429524	2.39402								-0.714286	-0.5	-0.6	-0.333333	0	-0.429524	0.277877
26	4.92667	-0.427143	1.76043								-0.142857	-0.75	-0.6	-0.5	-0.142857	-0.427143	0.274345
26.5	4.28667	-0.574762	3.52054								-0.571429	-0.75	-0.6	-0.666667	-0.285714	-0.574762	0.175607
27	4.52	-0.274762	2.48312								0.428571	-0.75	-0.6	-0.166667	-0.285714	-0.274762	0.457743
27.5	3.45333	-0.467143	1.31437								-0.714286	0.25	-0.8	-0.5	-0.571429	-0.467143	0.417769
28	3.46	-0.56	1.15576								-0.714286	-0.5	-0.8	-0.5	-0.285714	-0.56	0.202384
28.5	4.67333	-0.667143	2.61729								-0.714286	-0.75	-0.8	-0.5	-0.571429	-0.667143	0.12633
29	3.54	-0.608095	1.12901								-0.571429	-0.75	-0.6	-0.833333	-0.285714	-0.608095	0.209886
29.5	3.69333	-0.750476	2.04551								-0.714286	-1	-0.8	-0.666667	-0.571429	-0.750476	0.162101
30	2.95333	-0.700476	0.980249								-0.714286	-0.75	-0.8	-0.666667	-0.571429	-0.700476	0.0870986
30.5	2.79333	-0.676667	0.898888								-0.714286	-0.75	-0.8	-0.833333	-0.285714	-0.676667	0.223267
31	4.1	-0.617143	1.94222								-0.857143	-0.5	-0.8	-0.5	-0.428571	-0.617143	0.19624
31.5	2.5	-0.448571	0.745356								0.285714	-1	-0.6	-0.5	-0.428571	-0.448571	0.466161
32	2.42667	-0.762381	1.16866								-0.857143	-0.75	-0.8	-0.833333	-0.571429	-0.762381	0.114067
32.5	3.62	-0.757619	3.04864								-0.857143	-0.75	-0.8	-0.666667	-0.714286	-0.757619	0.0740089
33	2.42	-0.74381	1.05082								-0.857143	-1	-0.6	-0.833333	-0.428571	-0.74381	0.227238
33.5	1.88	-0.757619	0.337145								-0.857143	-0.75	-0.8	-0.666667	-0.714286	-0.757619	0.0740089
34	1.88667	-0.800952	0.728621								-0.857143	-1	-0.6	-0.833333	-0.714286	-0.800952	0.151426
34.5	2.58	-0.772381	2.14963								-0.857143	-1	-0.6	-0.833333	-0.571429	-0.772381	0.182214
35	2.33333	-0.78381	1.55009								-0.714286	-1	-0.8	-0.833333	-0.571429	-0.78381	0.157633
35.5	2.46	-0.840952	1.39929								-0.857143	-1	-0.8	-0.833333	-0.714286	-0.840952	0.104089
36	2.00667	-0.812381	1.88568								-0.857143	-1	-0.8	-0.833333	-0.571429	-0.812381	0.154802
36.5	2.90667	-0.834286	2.19386								-0.857143	-1	-0.6	-1	-0.714286	-0.834286	0.176589
37	2.34667	-0.79619	2.07386								-0.857143	-1	-0.6	-0.666667	-0.857143	-0.79619	0.161428
37.5	2.02667	-0.755238	0.87127								-0.857143	-1	-0.8	-0.833333	-0.285714	-0.755238	0.273335
38	1.94667	-0.772381	0.914573								-0.857143	-1	-0.6	-0.833333	-0.571429	-0.772381	0.182214
38.5	1.64667	-0.750952	0.663995								-0.857143	-0.75	-0.6	-0.833333	-0.714286	-0.750952	0.102707
39	1.48	-0.829524	0.458621								-0.857143	-1	-0.6	-0.833333	-0.857143	-0.829524	0.144294
39.5	1.75333	-0.762381	1.15653								-0.714286	-0.75	-0.8	-0.833333	-0.714286	-0.762381	0.0529835
40	1.46	-0.812857	1.45381								-1	-0.75	-0.6	-1	-0.714286	-0.812857	0.179597
40.5	0.926667	-0.772381	0.788247								-0.857143	-1	-0.6	-0.833333	-0.571429	-0.772381	0.182214
41	1.55333	-0.78381	1.39356								-0.857143	-1	-0.8	-0.833333	-0.428571	-0.78381	0.212735
41.5	0.933333	-0.87619	0.65192								-1	-1	-1	-0.666667	-0.714286	-0.87619	0.170367
42	0.913333	-0.58381	0.930233								-0.857143	0	-0.8	-0.833333	-0.428571	-0.58381	0.370353
42.5	1.40667	-0.840952	1.33924								-0.857143	-1	-0.8	-0.833333	-0.714286	-0.840952	0.104089
43	1.02	-0.512381	0.396933								-0.714286	0.5	-0.8	-0.833333	-0.714286	-0.512381	0.568371
43.5	1.50667	-0.722381	0.969077								-0.857143	-0.75	-0.6	-0.833333	-0.571429	-0.722381	0.131337
44	1.29333	-0.705238	0.735754								-0.714286	-0.75	-0.8	-0.833333	-0.428571	-0.705238	0.161259
44.5	1.36	-0.840952	1.51866								-0.857143	-1	-0.8	-0.833333	-0.714286	-0.840952	0.104089
45	1.32	-0.834286	0.787612								-0.857143	-1	-0.6	-1	-0.714286	-0.834286	0.176589
45.5	0.973333	-0.902857	0.451171								-0.857143	-1	-0.8	-1	-0.857143	-0.902857	0.091696
46	1.08	-0.840952	1.26877								-0.857143	-1	-0.8	-0.833333	-0.714286	-0.840952	0.104089
46.5	1.48	-0.807619	1.0616								-0.857143	-1	-0.8	-0.666667	-0.714286	-0.807619	0.13048
47	0.96	-0.74381	0.968791								-0.571429	-1	-0.6	-0.833333	-0.714286	-0.74381	0.176717
47.5	0.0533333	-0.852381	0.357926								-0.857143	-1	-1	-0.833333	-0.571429	-0.852381	0.175287
48	0.493333	-0.800952	0.521962								-1	-1	-0.6	-0.833333	-0.571429	-0.800952	0.208177
48.5	0.14	-0.800952	0.545894								-0.857143	-1	-0.6	-0.833333	-0.714286	-0.800952	0.151426
49	0.773333	-0.800952	0.62245								-0.857143	-1	-0.6	-0.833333	-0.714286	-0.800952	0.151426
49.5	0.273333	-0.840952	0.478656								-0.857143	-1	-0.8	-0.833333	-0.714286	-0.840952	0.104089
50	0.2	-0.83619	1.02334								-1	-1	-0.8	-0.666667	-0.714286	-0.83619	0.156984
50.5	0.14	-0.640952	0.432306								-0.571429	-1	-0.8	-0.833333	0	-0.640952	0.389511
51	0.306667	-0.840952	0.580421								-0.857143	-1	-0.8	-0.833333	-0.714286	-0.840952	0.104089
51.5	-0.0333333	-0.840952	0.477261								-0.857143	-1	-0.8	-0.833333	-0.714286	-0.840952	0.104089
52	0.646667	-0.800952	0.40387								-0.857143	-1	-0.6	-0.833333	-0.714286	-0.800952	0.151426
52.5	0.686667	-0.750952	0.417399								-0.857143	-0.75	-0.6	-0.833333	-0.714286	-0.750952	0.102707
53	0.2	-0.795714	1.01653								-0.714286	-0.75	-0.8	-1	-0.714286	-0.795714	0.11948
53.5	0.306667	-0.750952	0.530409								-1	-0.75	-0.6	-0.833333	-0.571429	-0.750952	0.175946
54	-0.0666667	-0.750952	0.494413								-0.857143	-0.75	-0.6	-0.833333	-0.714286	-0.750952	0.102707
54.5	0.34	-0.78381	0.562929								-0.857143	-1	-0.8	-0.833333	-0.428571	-0.78381	0.212735
55	0.0466667	-0.658095	0.268328								-0.285714	-1	-0.6	-0.833333	-0.571429	-0.658095	0.272562
55.5	-0.06	-0.669524	0.30948								-0.285714	-1	-0.8	-0.833333	-0.428571	-0.669524	0.299349
56	-0.0666667	-0.715238	0.190029								-0.857143	-1	-0.6	-0.833333	-0.285714	-0.715238	0.279707
56.5	-0.293333	-0.840952	0.31127								-0.857143	-1	-0.8	-0.833333	-0.714286	-0.840952	0.104089
57	0.853333	-0.869524	0.777675								-1	-1	-0.8	-0.833333	-0.714286	-0.869524	0.126778
57.5	-0.133333	-0.840952	0.380058								-0.857143	-1	-0.8	-0.833333	-0.714286	-0.840952	0.104089
58	0.506667	-0.698571	0.693381								-1	-0.75	-0.6	-1	-0.142857	-0.698571	0.354576
58.5	0.106667	-0.729048	0.255386								-0.857143	-0.75	-0.8	-0.666667	-0.571429	-0.729048	0.112491
59	-0.4	-0.869524	0.278887								-1	-1	-0.8	-0.833333	-0.714286	-0.869524	0.126778
59.5	-0.166667	-0.722381	0.527046								-0.857143	-0.75	-0.6	-0.833333	-0.571429	-0.722381	0.131337
60	-0.406667	-0.788571	0.245402								-0.857143	-1	-0.8	-1	-0.285714	-0.788571	0.294577

## Sheet: 500mVpp
Average	Stdev			Time	Average	Stdev
0	0			0.5	0	0
0.00317879	0.156042			1	0.00317879	0.156042
0.199821	0.302985			1.5	0.199821	0.302985
0.127974	0.221217			2	0.127974	0.221217
-0.0768121	0.275809			2.5	-0.0768121	0.275809
-0.18828	0.517023			3	-0.18828	0.517023
-0.056997	0.464165			3.5	-0.056997	0.464165
-0.0568182	0.322215			4	-0.0568182	0.322215
-0.333333	0.471405			4.5	-0.333333	0.471405
-0.330473	0.461861			5	-0.330473	0.461861
-0.162879	0.309866			5.5	-0.162879	0.309866
0.0196269	0.557357			6	0.0196269	0.557357
-0.260194	0.286703			6.5	-0.260194	0.286703
-0.451515	0.369697			7	-0.451515	0.369697
-0.17803	0.508028			7.5	-0.17803	0.508028
-0.23337	0.304239			8	-0.23337	0.304239
-0.401515	0.424513			8.5	-0.401515	0.424513
-0.417413	0.310112			9	-0.417413	0.310112
-0.49697	0.351097			9.5	-0.49697	0.351097
-0.253788	0.213335			10	-0.253788	0.213335
-0.468234	0.377362			10.5	-0.468234	0.377362
-0.557576	0.352663			11	-0.557576	0.352663
1.55346	1.0472			11.5	1.55346	1.0472
3.85574	1.73116			12	3.85574	1.73116
4.58343	3.00789			12.5	4.58343	3.00789
3.84347	2.30435			13	3.84347	2.30435
3.71616	2.43413			13.5	3.71616	2.43413
3.46657	2.16354			14	3.46657	2.16354
3.13692	2.06959			14.5	3.13692	2.06959
3.18474	2.11848			15	3.18474	2.11848
3.96887	2.95281			15.5	3.96887	2.95281
3.24521	2.4876			16	3.24521	2.4876
3.18028	2.10789			16.5	3.18028	2.10789
3.50496	2.81746			17	3.50496	2.81746
2.31108	1.03007			17.5	2.31108	1.03007
2.79489	1.93689			18	2.79489	1.93689
2.6703	1.96568			18.5	2.6703	1.96568
2.62692	1.55127			19	2.62692	1.55127
2.91595	2.03264			19.5	2.91595	2.03264
2.35719	1.52849			20	2.35719	1.52849
2.78549	1.77717			20.5	2.78549	1.77717
2.58878	2.17461			21	2.58878	2.17461
2.27325	1.67542			21.5	2.27325	1.67542
1.32843	0.905252			22	1.32843	0.905252
1.46739	1.13572			22.5	1.46739	1.13572
1.42024	0.562865			23	1.42024	0.562865
1.43932	1.03325			23.5	1.43932	1.03325
1.15958	0.810512			24	1.15958	0.810512
1.53221	0.880926			24.5	1.53221	0.880926
1.97912	2.30792			25	1.97912	2.30792
1.55083	1.57294			25.5	1.55083	1.57294
1.79357	2.39309			26	1.79357	2.39309
0.905065	0.903642			26.5	0.905065	0.903642
0.308333	0.216667			27	0.308333	0.216667
0.53196	0.884002			27.5	0.53196	0.884002
0.466946	0.380733			28	0.466946	0.380733
1.0166	0.888781			28.5	1.0166	0.888781
1.22933	1.69656			29	1.22933	1.69656
1.08776	1.54774			29.5	1.08776	1.54774
0.255615	0.167734			30	0.255615	0.167734
0.366741	0.273018			30.5	0.366741	0.273018
				31
				31.5
				32
				32.5
				33
				33.5
				34
				34.5
				35
				35.5
				36
				36.5
				37
				37.5
				38
				38.5
				39
				39.5
				40
				40.5
				41
				41.5
				42
				42.5
				43
				43.5
				44
				44.5
				45
				45.5
				46
				46.5
				47
				47.5
				48
				48.5
				49
				49.5
				50
				50.5
				51
				51.5
				52
				52.5
				53
				53.5
				54
				54.5
				55
				55.5
				56
				56.5
				57
				57.5
				58
				58.5
				59
				59.5
				60
				60.5
				61
				61.5
				62
				62.5
				63
				63.5
				64
				64.5
				65
				65.5
				66
				66.5
				67
				67.5
				68
				68.5
				69
				69.5
				70
				70.5
				71
				71.5
				72
				72.5
				73
				73.5
				74
				74.5
				75
				75.5
				76
				76.5
				77
				77.5
				78
				78.5
				79
				79.5
				80
				80.5
				81
				81.5
				82
				82.5
				83
				83.5
				84
				84.5
				85
				85.5
				86
				86.5
				87
				87.5
				88
				88.5
				89
				89.5
				90
				90.5
				91
				91.5
				92
				92.5
				93
				93.5
				94
				94.5
				95
				95.5
				96
				96.5
				97
				97.5
				98
				98.5
				99
				99.5

## Sheet: 900 mVpp 3s
											Average	Stdev			Time	Average	Stdev
					0			0	0	0	0	0			0.5	0	0
					-0.166667			0	-0.5	-0.5	-0.333333	0.288675			1	-0.333333	0.288675
					0			1.5	-0.5	-0.5	0.166667	1.1547			1.5	0.166667	1.1547
					-0.333333			1.5	0	-0.5	0.333333	1.04083			2	0.333333	1.04083
					-0.166667			2.5	-0.5	2	1.33333	1.60728			2.5	1.33333	1.60728
					0			-0.5	-0.5	0	-0.333333	0.288675			3	-0.333333	0.288675
					0			4	-1	1.5	1.5	2.5			3.5	1.5	2.5
					-0.333333			1	-0.5	0.5	0.333333	0.763763			4	0.333333	0.763763
					-0.166667			-0.5	-0.5	1.5	0.166667	1.1547			4.5	0.166667	1.1547
					-0.166667			0	0	1	0.333333	0.57735			5	0.333333	0.57735
					-0.166667			2	-0.5	1	0.833333	1.25831			5.5	0.833333	1.25831
					0			-0.5	0	1	0.166667	0.763763			6	0.166667	0.763763
					-0.333333			4.5	-0.5	1	1.66667	2.5658			6.5	1.66667	2.5658
					0			0.5	-1	-0.5	-0.333333	0.763763			7	-0.333333	0.763763
					-0.166667			1	-0.5	0	0.166667	0.763763			7.5	0.166667	0.763763
					-0.666667			-0.5	-0.5	1.5	0.166667	1.1547			8	0.166667	1.1547
					-0.166667			1	-1	1.5	0.5	1.32288			8.5	0.5	1.32288
					-0.166667			-0.5	-0.5	1	0	0.866025			9	0	0.866025
					-0.166667			2	-0.5	1.5	1	1.32288			9.5	1	1.32288
					0			-0.5	-0.5	1.5	0.166667	1.1547			10	0.166667	1.1547
					0			-0.5	-1	0.5	-0.333333	0.763763			10.5	-0.333333	0.763763
					-0.333333			1	-1	-0.5	-0.166667	1.04083			11	-0.166667	1.04083
					0.833333			5	2.5	3.5	3.66667	1.25831			11.5	3.66667	1.25831
					2			11	7.5	8	8.83333	1.89297			12	8.83333	1.89297
					3			11	8.5	14.5	11.3333	3.01386			12.5	11.3333	3.01386
					3.16667			14	9	12	11.6667	2.51661			13	11.6667	2.51661
					3			14.5	8.5	10.5	11.1667	3.05505			13.5	11.1667	3.05505
					3			16	9	12.5	12.5	3.5			14	12.5	3.5
					3			10.5	8.5	11.5	10.1667	1.52753			14.5	10.1667	1.52753
					2.83333			11.5	8	15	11.5	3.5			15	11.5	3.5
					2			15	8.5	11	11.5	3.27872			15.5	11.5	3.27872
					2.5			10.5	8	10	9.5	1.32288			16	9.5	1.32288
					2.5			14	9	14.5	12.5	3.04138			16.5	12.5	3.04138
					2.33333			20	7.5	8.5	12	6.94622			17	12	6.94622
					2.5			9.5	7.5	9.5	8.83333	1.1547			17.5	8.83333	1.1547
					2.16667			14.5	6	11.5	10.6667	4.31084			18	10.6667	4.31084
					2			12.5	6.5	8.5	9.16667	3.05505			18.5	9.16667	3.05505
					2.16667			17	9.5	9.5	12	4.33013			19	12	4.33013
					2			7	5.5	9	7.16667	1.75594			19.5	7.16667	1.75594
					1.5			14.5	6	7	9.16667	4.64579			20	9.16667	4.64579
					1.66667			10	5	7.5	7.5	2.5			20.5	7.5	2.5
					1.83333			7.5	8	7.5	7.66667	0.288675			21	7.66667	0.288675
					1.5			9.5	6.5	8.5	8.16667	1.52753			21.5	8.16667	1.52753
					1.33333			9	5	6	6.66667	2.08167			22	6.66667	2.08167
					1.66667			8.5	4.5	12	8.33333	3.75278			22.5	8.33333	3.75278
					1.5			12	4.5	7.5	8	3.77492			23	8	3.77492
					1.5			14.5	4.5	6	8.33333	5.3929			23.5	8.33333	5.3929
					1.33333			12.5	7	12.5	10.6667	3.17543			24	10.6667	3.17543
					1			9	3.5	5.5	6	2.78388			24.5	6	2.78388
					1.33333			12.5	4	12	9.5	4.7697			25	9.5	4.7697
					1.33333			8	3.5	12	7.83333	4.25245			25.5	7.83333	4.25245
					1.33333			9	4	6	6.33333	2.51661			26	6.33333	2.51661
					1.33333			11	3	5	6.33333	4.16333			26.5	6.33333	4.16333
					1.16667			9	3	5	5.66667	3.05505			27	5.66667	3.05505
					0.833333			4.5	2	5	3.83333	1.60728			27.5	3.83333	1.60728
					1			6.5	2.5	7	5.33333	2.46644			28	5.33333	2.46644
					1			6	2	7	5	2.64575			28.5	5	2.64575
					0.833333			8.5	3	5	5.5	2.78388			29	5.5	2.78388
					0.666667			9	2	4.5	5.16667	3.5473			29.5	5.16667	3.5473
					1.16667			5	2	5	4	1.73205			30	4	1.73205
					0.5			9.5	2	7.5	6.33333	3.88373			30.5	6.33333	3.88373
					0.833333			8	1.5	4	4.5	3.27872			31	4.5	3.27872
					0.333333			7.5	1.5	3	4	3.1225			31.5	4	3.1225
					0.5			3.5	1.5	4.5	3.16667	1.52753			32	3.16667	1.52753
					0.166667			5.5	1.5	4.5	3.83333	2.08167			32.5	3.83333	2.08167
					0.333333			6.5	0.5	2.5	3.16667	3.05505			33	3.16667	3.05505
					0.5			1.5	1.5	3.5	2.16667	1.1547			33.5	2.16667	1.1547
					0.166667			5.5	1	3	3.16667	2.25462			34	3.16667	2.25462
					0.5			8	1.5	4	4.5	3.27872			34.5	4.5	3.27872
					0.333333			5.5	1.5	6.5	4.5	2.64575			35	4.5	2.64575
					0.333333			3.5	0	2.5	2	1.80278			35.5	2	1.80278
					0.166667			3.5	1	3	2.5	1.32288			36	2.5	1.32288
					0.166667			5.5	0.5	3	3	2.5			36.5	3	2.5
					-0.166667			2	1	3.5	2.16667	1.25831			37	2.16667	1.25831
					0			2.5	0.5	2	1.66667	1.04083			37.5	1.66667	1.04083
					0.166667			1	0.5	5.5	2.33333	2.75379			38	2.33333	2.75379
					0			4	0.5	3	2.5	1.80278			38.5	2.5	1.80278
					0.166667			5	0.5	5.5	3.66667	2.75379			39	3.66667	2.75379
					0			2	0.5	5	2.5	2.29129			39.5	2.5	2.29129
					-0.166667			6	0	2	2.66667	3.05505			40	2.66667	3.05505
					0			4.5	0.5	2	2.33333	2.02073			40.5	2.33333	2.02073
					0.166667			1	0	2.5	1.16667	1.25831			41	1.16667	1.25831
					0			0	0	1.5	0.5	0.866025			41.5	0.5	0.866025
					-0.166667			2.5	0	2	1.5	1.32288			42	1.5	1.32288
					-0.166667			5.5	0	2	2.5	2.78388			42.5	2.5	2.78388
					-0.166667			1.5	0	1.5	1	0.866025			43	1	0.866025
					0			0	0.5	1.5	0.666667	0.763763			43.5	0.666667	0.763763
					0.333333			2.5	1	0	1.16667	1.25831			44	1.16667	1.25831
					-0.166667			2	0	1	1	1			44.5	1	1
					0			6.5	0	1.5	2.66667	3.40343			45	2.66667	3.40343
					-0.166667			2	-0.5	-0.5	0.333333	1.44338			45.5	0.333333	1.44338
					-0.166667			-0.5	-0.5	1.5	0.166667	1.1547			46	0.166667	1.1547
					-0.166667			3.5	0	2	1.83333	1.75594			46.5	1.83333	1.75594
					-0.166667			0	-0.5	3	0.833333	1.89297			47	0.833333	1.89297
					0			1.5	-0.5	1	0.666667	1.04083			47.5	0.666667	1.04083
					-0.333333			0	0	-0.5	-0.166667	0.288675			48	-0.166667	0.288675
					-0.166667			-0.5	-0.5	1	0	0.866025			48.5	0	0.866025
					0			-0.5	-0.5	1	0	0.866025			49	0	0.866025
					0			-0.5	-0.5	1.5	0.166667	1.1547			49.5	0.166667	1.1547
					-0.166667			0	-0.5	1.5	0.333333	1.04083			50	0.333333	1.04083
					-0.166667			0.5	-0.5	1	0.333333	0.763763			50.5	0.333333	0.763763
					-0.166667			1.5	-1	0	0.166667	1.25831			51	0.166667	1.25831
					-0.166667			0	-0.5	0.5	0	0.5			51.5	0	0.5
					-0.5			1	-0.5	2.5	1	1.5			52	1	1.5
					0			0	-0.5	0.5	0	0.5			52.5	0	0.5
					-0.166667			-0.5	-1	1.5	0	1.32288			53	0	1.32288
					-0.166667			-0.5	-1	0	-0.5	0.5			53.5	-0.5	0.5
					-0.166667			-0.5	-1	0	-0.5	0.5			54	-0.5	0.5
					-0.166667			0.5	-0.5	0	0	0.5			54.5	0	0.5
					-0.166667			-1	-1	1	-0.333333	1.1547			55	-0.333333	1.1547
					0			-0.5	-0.5	-0.5	-0.5	0			55.5	-0.5	0
					-0.166667			-1	0	0	-0.333333	0.57735			56	-0.333333	0.57735
					-0.333333			-0.5	-1	2.5	0.333333	1.89297			56.5	0.333333	1.89297
					-0.166667			1	-1	0.5	0.166667	1.04083			57	0.166667	1.04083
					-0.166667			-0.5	-1	-0.5	-0.666667	0.288675			57.5	-0.666667	0.288675
					-0.166667			-0.5	-1	-0.5	-0.666667	0.288675			58	-0.666667	0.288675
					-0.166667			-0.5	-0.5	0	-0.333333	0.288675			58.5	-0.333333	0.288675
					-0.166667			-1	-1	0	-0.666667	0.57735			59	-0.666667	0.57735
					-0.5			-1	-1	0	-0.666667	0.57735			59.5	-0.666667	0.57735
					0			-1	-0.5	-0.5	-0.666667	0.288675			60	-0.666667	0.288675
								20	9.5	15					60.5
															61
															61.5
															62
															62.5
															63
															63.5
															64
															64.5
															65
															65.5
															66
															66.5
															67
															67.5
															68
															68.5
															69
															69.5
															70
															70.5
															71
															71.5
															72
															72.5
															73
															73.5
															74
															74.5
															75
															75.5
															76
															76.5
															77
															77.5
															78
															78.5
															79
															79.5
															80
															80.5
															81
															81.5
															82
															82.5
															83
															83.5
															84
															84.5
															85
															85.5
															86
															86.5
															87
															87.5
															88
															88.5
															89
															89.5
															90
															90.5
															91
															91.5
															92
															92.5
															93
															93.5
															94
															94.5
															95
															95.5
															96
															96.5
															97
															97.5
															98
															98.5
															99
															99.5

## Sheet: 900mVpp 5s PcTx1-50nM
Time	Control	PcTx1-50nM	Stdev-control	Stdev PcTx1-50nM		Time	Control	PcTx1-50nM	Stdev-control	Stdev PcTx1-50nM																											Average	Stdev
0.5	0	0	0	0		0.5	0	0	0	0																							0	0	0	0	0	0
1	0.17	-0.163889	0.263629	0.528727		1	0.17	-0.204861	0.263629	0.601286																							-0.777778	0.375	0.25	-0.666667	-0.204861	0.601286
1.5	-0.00666667	-0.238889	0.330109	0.627802		1.5	-0.00666667	-0.298611	0.330109	0.708333																							-0.777778	-0.5	0.75	-0.666667	-0.298611	0.708333
2	-0.0566667	-0.322222	0.222236	0.667129		2	-0.0566667	-0.152778	0.222236	0.63404																							-0.777778	-0.5	0	0.666667	-0.152778	0.63404
2.5	-0.14	-0.169444	0.219089	0.707134		2.5	-0.14	-0.211806	0.219089	0.809169																							-0.555556	-0.625	1	-0.666667	-0.211806	0.809169
3	0.1	-0.297222	0.537355	0.404164		3	0.1	-0.371528	0.537355	0.425429																							-0.444444	-0.625	0.25	-0.666667	-0.371528	0.425429
3.5	-0.146667	-0.241667	0.31763	0.410792		3.5	-0.146667	-0.302083	0.31763	0.447957																							-0.666667	-0.125	0.25	-0.666667	-0.302083	0.447957
4	0.0666667	-0.538889	0.271058	0.476937		4	0.0666667	-0.423611	0.271058	0.463356																							-0.777778	-0.5	0.25	-0.666667	-0.423611	0.463356
4.5	-0.21	-0.511111	0.201246	0.481766		4.5	-0.21	-0.388889	0.201246	0.458123																							-0.888889	0	0	-0.666667	-0.388889	0.458123
5	-0.0766667	-0.272222	0.407499	0.789202		5	-0.0766667	-0.0902778	0.407499	0.780872																							-0.777778	-0.75	0.5	0.666667	-0.0902778	0.780872
5.5	-0.113333	0.155556	0.337968	0.659276		5.5	-0.113333	0.194444	0.337968	0.754615																							-0.888889	0.25	0.75	0.666667	0.194444	0.754615
6	0.05	-0.105556	0.304138	0.654519		6	0.05	-0.381944	0.304138	0.24884																							-0.111111	-0.5	-0.25	-0.666667	-0.381944	0.24884
6.5	0	-0.163889	0.282843	0.660153		6.5	0	-0.204861	0.282843	0.754903																							-0.777778	0.875	-0.25	-0.666667	-0.204861	0.754903
7	-0.14	-0.369444	0.219089	0.539132		7	-0.14	-0.211806	0.219089	0.471046																							0.444444	-0.375	-0.25	-0.666667	-0.211806	0.471046
7.5	-0.106667	-0.436111	0.307905	0.527193		7.5	-0.106667	-0.545139	0.307905	0.539749																							-0.888889	-0.875	0.25	-0.666667	-0.545139	0.539749
8	-0.153333	-0.494444	0.388444	0.533738		8	-0.153333	-0.368056	0.388444	0.52282																							-0.222222	-0.5	0.25	-1	-0.368056	0.52282
8.5	-0.326667	-0.594444	0.192065	0.370394		8.5	-0.326667	-0.493056	0.192065	0.338217																							-0.555556	-0.75	0	-0.666667	-0.493056	0.338217
9	-0.236667	-0.263889	0.354808	0.53881		9	-0.236667	-0.0798611	0.354808	0.401639																							0.222222	0.125	0	-0.666667	-0.0798611	0.401639
9.5	-0.286667	-0.463889	0.215187	0.326551		9.5	-0.286667	-0.579861	0.215187	0.229167																							-0.777778	-0.625	-0.25	-0.666667	-0.579861	0.229167
10	-0.0966667	-0.558333	0.227425	0.42246		10	-0.0966667	-0.447917	0.227425	0.395833																							0	-0.875	-0.25	-0.666667	-0.447917	0.395833
10.5	-0.213333	-0.333333	0.354221	0.311805		10.5	-0.213333	-0.416667	0.354221	0.288675																							0	-0.5	-0.5	-0.666667	-0.416667	0.288675
11	-0.196667	-0.344444	0.278488	0.320108		11	-0.196667	-0.430556	0.278488	0.295282																							-0.555556	-0.5	0	-0.666667	-0.430556	0.295282
11.5	-0.246667	0.863889	0.45604	1.87963		11.5	-0.246667	0.0798611	0.45604	0.782753																							-0.222222	-0.375	1.25	-0.333333	0.0798611	0.782753
12	3.46333	2.23056	0.856381	3.30248		12	3.46333	0.788194	0.856381	0.820062																							-0.222222	0.625	1.75	1	0.788194	0.820062
12.5	5.11	2.34167	0.851763	2.71512		12.5	5.11	1.17708	0.851763	0.887396																							0.666667	0.875	2.5	0.666667	1.17708	0.887396
13	6.46333	2.73056	1.37206	2.97902		13	6.46333	1.41319	1.37206	0.512997																							1.11111	0.875	2	1.66667	1.41319	0.512997
13.5	7.25333	2.31111	1.50626	3.27256		13.5	7.25333	0.888889	1.50626	0.891489																							1.55556	0.25	1.75	0	0.888889	0.891489
14	7.75667	2.83333	1.48584	4.12942		14	7.75667	1.04167	1.48584	1.1557																							0.333333	0.75	2.75	0.333333	1.04167	1.1557
14.5	7.75	4.13333	1.3537	3.94828		14.5	7.75	2.41667	1.3537	1.06719																							1.66667	2	2	4	2.41667	1.06719
15	7.67333	3.82778	1.36145	4.76243		15	7.67333	1.78472	1.36145	1.55363																							0.555556	3.25	3	0.333333	1.78472	1.55363
15.5	8.28333	3.71111	1.54857	5.86505		15.5	8.28333	1.13889	1.54857	1.32521																							-0.111111	1	3	0.666667	1.13889	1.32521
16	7.94	4.23889	1.35573	5.53069		16	7.94	1.79861	1.35573	1.04167																							0.777778	1.5	3.25	1.66667	1.79861	1.04167
16.5	7.81333	4.13889	1.33497	5.62951		16.5	7.81333	1.67361	1.33497	1.31827																							1.77778	0.75	3.5	0.666667	1.67361	1.31827
17	8.16	3.825	2.18501	5.16569		17	8.16	1.53125	2.18501	0.709864																							1	1.625	2.5	1	1.53125	0.709864
17.5	7.19667	5.46944	1.36231	5.966		17.5	7.19667	2.83681	1.36231	1.11909																							1.22222	3.375	3.75	3	2.83681	1.11909
18	7.3	4.72778	1.67145	5.45161		18	7.3	2.40972	1.67145	1.95044																							0.222222	1.5	3.25	4.66667	2.40972	1.95044
18.5	7.45	4.74722	1.62404	4.77316		18.5	7.45	2.68403	1.62404	1.41382																							1.11111	1.875	3.75	4	2.68403	1.41382
19	7.49333	4.50833	1.32469	5.38326		19	7.49333	2.13542	1.32469	1.04935																							1.66667	0.875	3	3	2.13542	1.04935
19.5	6.93	4.93889	1.36363	6.30863		19.5	6.93	2.17361	1.36363	1.44451																							1.11111	0.75	3.5	3.33333	2.17361	1.44451
20	6.70333	4.22222	1.25302	5.14482		20	6.70333	2.02778	1.25302	1.78557																							0.111111	1	4	3	2.02778	1.78557
20.5	6.57333	5.05556	1.39037	5.32359		20.5	6.57333	2.81944	1.39037	2.1102																							1.44444	0.75	3.75	5.33333	2.81944	2.1102
21	6.47667	4.68611	1.26401	4.8727		21	6.47667	2.60764	1.26401	1.69036																							0.888889	1.625	3.25	4.66667	2.60764	1.69036
21.5	6.09333	4.06389	1.00427	3.71272		21.5	6.09333	2.57986	1.00427	1.92271																							0.444444	1.875	3	5	2.57986	1.92271
22	6.10333	3.45833	0.993339	4.40742		22	6.10333	1.57292	0.993339	1.48385																							0	0.625	3	2.66667	1.57292	1.48385
22.5	5.96333	4.225	0.766522	3.67253		22.5	5.96333	3.03125	0.766522	2.91257																							0	2.375	2.75	7	3.03125	2.91257
23	5.69667	3.75833	1.14676	4.27773		23	5.69667	1.94792	1.14676	1.59621																							0.333333	1.125	4	2.33333	1.94792	1.59621
23.5	5.88333	3.28889	1.02497	2.95501		23.5	5.88333	2.11111	1.02497	1.5476																							1.11111	1	2	4.33333	2.11111	1.5476
24	5.76	3.56111	1.33716	3.50828		24	5.76	2.20139	1.33716	2.02116																							0.222222	0.75	3.5	4.33333	2.20139	2.02116
24.5	5.22333	3.2	1.10803	3.04229		24.5	5.22333	2	1.10803	1.65552																							0.666667	1	2	4.33333	2	1.65552
25	5.19	3.14444	0.676757	3.45375		25	5.19	1.68056	0.676757	1.27203																							0.888889	0.5	2	3.33333	1.68056	1.27203
25.5	5.34333	3.18333	1.42164	3.31055		25.5	5.34333	1.72917	1.42164	0.71807																							0.666667	2	2.25	2	1.72917	0.71807
26	4.86	3.15556	0.762725	4.19111		26	4.86	1.44444	0.762725	1.97515																							-0.222222	0	2	4	1.44444	1.97515
26.5	4.84	2.5	0.776531	2.67382		26.5	4.84	1.375	0.776531	1.04638																							0.333333	0.75	1.75	2.66667	1.375	1.04638
27	4.68	3.25	0.921005	3.65053		27	4.68	2.0625	0.921005	2.89266																							0.666667	0	1.25	6.33333	2.0625	2.89266
27.5	4.74333	2.45556	1.17908	2.26091		27.5	4.74333	1.56944	1.17908	1.25739																							1.11111	0	2.5	2.66667	1.56944	1.25739
28	4.19	2.28889	0.667458	2.74864		28	4.19	1.11111	0.667458	0.908635																							0.111111	0.75	2.25	1.33333	1.11111	0.908635
28.5	5	2.04722	1.27279	2.40722		28.5	5	1.05903	1.27279	1.10277																							-0.222222	0.625	1.5	2.33333	1.05903	1.10277
29	4.08333	2.38333	0.7075	2.6781		29	4.08333	1.22917	0.7075	0.826009																							0	1.5	1.75	1.66667	1.22917	0.826009
29.5	4.28333	2.55833	1.00236	3.70126		29.5	4.28333	0.947917	1.00236	0.987992																							0.666667	-0.125	2.25	1	0.947917	0.987992
30	4.14333	2.28333	1.22552	2.20133		30	4.14333	1.60417	1.22552	1.84011																							0.333333	0.75	1	4.33333	1.60417	1.84011
30.5	4.66667	1.7	0.88042	1.89444		30.5	4.66667	0.875	0.88042	0.49768																							0.333333	1.5	1	0.666667	0.875	0.49768
31	3.82	1.91944	0.831114	2.48806		31	3.82	1.14931	0.831114	2.0736																							-0.777778	0.125	1.25	4	1.14931	2.0736
31.5	3.58	1.96111	0.361594	1.82971		31.5	3.58	1.20139	0.361594	0.784814																							0.555556	0.5	1.75	2	1.20139	0.784814
32	3.63667	0.952778	0.800555	1.42426		32	3.63667	0.440972	0.800555	0.97897																							-0.111111	-0.625	1.5	1	0.440972	0.97897
32.5	3.29333	1.47222	0.372231	1.55803		32.5	3.29333	0.840278	0.372231	0.757804																							1.11111	-0.25	1.5	1	0.840278	0.757804
33	3.46333	1.75556	0.385213	2.21582		33	3.46333	0.944444	0.385213	1.46986																							-0.222222	0	1	3	0.944444	1.46986
33.5	3.4	1.95556	0.552268	1.83445		33.5	3.4	1.44444	0.552268	1.65692																							0.111111	0.25	1.75	3.66667	1.44444	1.65692
34	3.66	1.08611	0.625899	1.0141		34	3.66	0.857639	0.625899	1.01153																							0.555556	-0.375	1.25	2	0.857639	1.01153
34.5	3.24	1.43333	0.767626	1.48885		34.5	3.24	0.791667	0.767626	0.458964																							0.333333	1	0.5	1.33333	0.791667	0.458964
35	3.23333	1.25278	0.696818	1.81415		35	3.23333	0.815972	0.696818	1.76527																							-0.444444	-0.375	0.75	3.33333	0.815972	1.76527
35.5	2.90667	0.994444	0.491822	1.71328		35.5	2.90667	0.243056	0.491822	0.387149																							-0.111111	0	0.75	0.333333	0.243056	0.387149
36	3.2	0.322222	0.989949	0.562663		36	3.2	0.152778	0.989949	0.480323																							-0.222222	-0.25	0.75	0.333333	0.152778	0.480323
36.5	2.84667	0.491667	0.693462	1.07545		36.5	2.84667	0.114583	0.693462	0.770833																							-0.666667	-0.375	0.5	1	0.114583	0.770833
37	2.64333	0.480556	0.290498	1.14217		37	2.64333	0.100694	0.290498	0.881726																							-0.555556	-0.625	1.25	0.333333	0.100694	0.881726
37.5	2.81	0.161111	1.0102	0.688978		37.5	2.81	-0.0486111	1.0102	0.582837																							-0.777778	-0.25	0.5	0.333333	-0.0486111	0.582837
38	2.52667	-0.00555556	0.305869	0.466634		38	2.52667	-0.00694444	0.305869	0.53881																							-0.444444	0	0.75	-0.333333	-0.00694444	0.53881
38.5	2.61333	0.341667	0.545104	1.06816		38.5	2.61333	-0.0729167	0.545104	0.612727																							-0.666667	-0.375	0.75	0	-0.0729167	0.612727
39	2.47333	0.475	0.716919	0.974323		39	2.47333	0.09375	0.716919	0.54473																							-0.333333	-0.375	0.75	0.333333	0.09375	0.54473
39.5	2.19	0.480556	0.381445	0.959017		39.5	2.19	0.350694	0.381445	1.0554																							-0.888889	0.125	0.5	1.66667	0.350694	1.0554
40	2.64667	0.152778	0.971068	1.09573		40	2.64667	-0.309028	0.971068	0.423155																							-0.777778	-0.375	0.25	-0.333333	-0.309028	0.423155
40.5	2.12333	0.0805556	0.424526	0.896904		40.5	2.12333	-0.149306	0.424526	0.848729																							-0.888889	-0.875	0.5	0.666667	-0.149306	0.848729
41	2.13667	0.344444	0.545487	1.07665		41	2.13667	-0.0694444	0.545487	0.635255																							-0.777778	-0.25	0.75	0	-0.0694444	0.635255
41.5	1.94	0.163889	0.778942	0.777306		41.5	1.94	-0.0451389	0.778942	0.717163																							-0.222222	-0.625	1	-0.333333	-0.0451389	0.717163
42	1.84333	0.461111	0.500222	0.689314		42	1.84333	0.326389	0.500222	0.715918																							0.888889	-0.25	1	-0.333333	0.326389	0.715918
42.5	1.76333	0.261111	0.354808	0.780649		42.5	1.76333	0.0763889	0.354808	0.764898																							-0.777778	-0.25	1	0.333333	0.0763889	0.764898
43	1.79	-0.313889	0.730068	0.547124		43	1.79	-0.392361	0.730068	0.598392																							-0.777778	-0.625	0.5	-0.666667	-0.392361	0.598392
43.5	1.83333	0.302778	0.573852	0.681292		43.5	1.83333	0.128472	0.573852	0.645236																							-0.777778	0.125	0.5	0.666667	0.128472	0.645236
44	1.69333	0.0555556	0.671917	1.13312		44	1.69333	-0.430556	0.671917	0.369559																							-0.888889	-0.5	0	-0.333333	-0.430556	0.369559
44.5	1.74333	-0.0222222	0.271211	0.654519		44.5	1.74333	-0.0277778	0.271211	0.755637																							-0.777778	0	1	-0.333333	-0.0277778	0.755637
45	1.47667	-0.483333	0.29898	0.457954		45	1.47667	-0.604167	0.29898	0.426956																							-1	-0.75	0	-0.666667	-0.604167	0.426956
45.5	1.91333	0.422222	0.609006	1.50198		45.5	1.91333	0.527778	0.609006	1.71279																							-0.888889	-0.25	0.25	3	0.527778	1.71279
46	1.54	-0.0583333	0.773305	0.41625		46	1.54	-0.0729167	0.773305	0.479167																							0	-0.125	0.5	-0.666667	-0.0729167	0.479167
46.5	1.53667	-0.436111	0.663995	0.817653		46.5	1.53667	-0.295139	0.663995	0.871161																							-0.888889	-0.625	1	-0.666667	-0.295139	0.871161
47	1.35333	-0.319444	0.726617	0.417129		47	1.35333	-0.399306	0.726617	0.43529																							-0.555556	-0.625	0.25	-0.666667	-0.399306	0.43529
47.5	1.43333	-0.169444	0.821922	0.505792		47.5	1.43333	-0.211806	0.821922	0.573705																							-0.888889	-0.125	0.5	-0.333333	-0.211806	0.573705
48	1.48	-0.694444	0.909395	0.274986		48	1.48	-0.618056	0.909395	0.24884																							-0.888889	-0.75	-0.5	-0.333333	-0.618056	0.24884
48.5	1.59	-0.286111	0.663702	0.551338		48.5	1.59	-0.357639	0.663702	0.609254																							-0.888889	-0.375	0.5	-0.666667	-0.357639	0.609254
49	1.18	-0.436111	0.349285	0.410557		49	1.18	-0.545139	0.349285	0.381439																							-0.888889	-0.625	0	-0.666667	-0.545139	0.381439
49.5	1.17667	-0.466667	0.476329	0.32596		49.5	1.17667	-0.583333	0.476329	0.225668																							-0.666667	-0.75	-0.25	-0.666667	-0.583333	0.225668
50	1.3	-0.236111	0.410792	0.834259		50	1.3	-0.545139	0.410792	0.539749																							-0.888889	-0.875	0.25	-0.666667	-0.545139	0.539749
50.5	0.923333	-0.238889	0.523025	0.454572		50.5	0.923333	-0.298611	0.523025	0.501733																							-0.777778	0	0.25	-0.666667	-0.298611	0.501733
51	1.26333	-0.319444	0.494188	0.417129		51	1.26333	-0.399306	0.494188	0.43529																							-0.555556	-0.625	0.25	-0.666667	-0.399306	0.43529
51.5	1.34	-0.411111	0.60663	0.503613		51.5	1.34	-0.513889	0.60663	0.517443																							-0.888889	-0.75	0.25	-0.666667	-0.513889	0.517443
52	1.24	-0.611111	0.307002	0.498067		52	1.24	-0.513889	0.307002	0.517443																							-0.888889	-0.75	0.25	-0.666667	-0.513889	0.517443
52.5	0.833333	-0.616667	0.478859	0.37081		52.5	0.833333	-0.520833	0.478859	0.349437																							-0.666667	-0.75	0	-0.666667	-0.520833	0.349437
53	0.833333	-0.633333	0.485341	0.515725		53	0.833333	-0.541667	0.485341	0.546453																							-1	-0.75	0.25	-0.666667	-0.541667	0.546453
53.5	0.793333	-0.652778	0.375019	0.429434		53.5	0.793333	-0.565972	0.375019	0.442323																							-0.888889	-0.125	-0.25	-1	-0.565972	0.442323
54	1.04	-0.711111	0.639727	0.287738		54	1.04	-0.638889	0.639727	0.274986																							-0.888889	-0.75	-0.25	-0.666667	-0.638889	0.274986
54.5	0.743333	-0.5	0.271211	0.482327		54.5	0.743333	-0.375	0.271211	0.453893																							-0.333333	-0.75	0.25	-0.666667	-0.375	0.453893
55	1.09333	-0.5	0.456222	0.5		55	1.09333	-0.625	0.456222	0.478714																							-1	-0.5	0	-1	-0.625	0.478714
55.5	0.863333	-0.652778	0.495031	0.410839		55.5	0.863333	-0.815972	0.495031	0.217949																							-0.888889	-0.875	-0.5	-1	-0.815972	0.217949
56	0.693333	-0.8	0.4585	0.32596		56	0.693333	-0.75	0.4585	0.353553																							-1	-0.75	-0.25	-1	-0.75	0.353553
56.5	1.08333	-0.527778	0.593483	0.489866		56.5	1.08333	-0.409722	0.593483	0.476492																							-0.888889	-0.75	0	0	-0.409722	0.476492
57	0.983333	-0.775	0.575664	0.436606		57	0.983333	-0.71875	0.575664	0.482776																							-1	-0.875	0	-1	-0.71875	0.482776
57.5	0.623333	-0.658333	0.266562	0.368462		57.5	0.623333	-0.572917	0.266562	0.363839																							-1	-0.125	-0.5	-0.666667	-0.572917	0.363839
58	0.943333	-0.677778	0.751258	0.528727		58	0.943333	-0.597222	0.751258	0.573999																							-0.888889	-0.75	0.25	-1	-0.597222	0.573999
58.5	0.51	-0.613889	0.450555	0.4983		58.5	0.51	-0.517361	0.450555	0.518606																							-0.777778	-0.875	0.25	-0.666667	-0.517361	0.518606
59	0.42	-0.725	0.485541	0.547723		59	0.42	-0.65625	0.485541	0.607033																							-1	-0.875	0.25	-1	-0.65625	0.607033
59.5	0.556667	-0.611111	0.153478	0.350815		59.5	0.556667	-0.513889	0.153478	0.317931																							-0.888889	-0.25	-0.25	-0.666667	-0.513889	0.317931
60	0.646667	-0.758333	0.525648	0.315128		60	0.646667	-0.697917	0.525648	0.328744																							-1	-0.875	-0.25	-0.666667	-0.697917	0.328744

## Sheet: 900mVpp 3s
900mvpp-3s	Time	Average	Stdev		Gray_Value				Time	Gray_Value				Gray_Value				Gray_Value				Gray_Value										Average	Stdev
	0.5	-0.433333	0.465475		0	-3	-1	-1	0.5	1	-5	-0.833333	-0.833333	6	0	0	0	2	-1	-0.333333	-0.333333	5	0	0	0		-0.833333	-1	0	-0.333333	0	-0.433333	0.465475
	1	-0.2	0.298142		1	-2	-0.666667	-0.666667	1	6	0	0	0	6	0	0	0	2	-1	-0.333333	-0.333333	5	0	0	0		0	-0.666667	0	-0.333333	0	-0.2	0.298142
	1.5	-0.24	0.277288		3	0	0	0	1.5	4	-2	-0.333333	-0.333333	6	0	0	0	1	-2	-0.666667	-0.666667	4	-1	-0.2	-0.2		-0.333333	0	0	-0.666667	-0.2	-0.24	0.277288
	2	-0.126667	0.57465		0	-3	-1	-1	2	9	3	0.5	0.5	6	0	0	0	2	-1	-0.333333	-0.333333	6	1	0.2	0.2		0.5	-1	0	-0.333333	0.2	-0.126667	0.57465
	2.5	-0.233333	0.401386		1	-2	-0.666667	-0.666667	2.5	7	1	0.166667	0.166667	6	0	0	0	1	-2	-0.666667	-0.666667	5	0	0	0		0.166667	-0.666667	0	-0.666667	0	-0.233333	0.401386
	3	-0.653333	0.313227		0	-3	-1	-1	3	1	-5	-0.833333	-0.833333	5	-1	-0.166667	-0.166667	1	-2	-0.666667	-0.666667	2	-3	-0.6	-0.6		-0.833333	-1	-0.166667	-0.666667	-0.6	-0.653333	0.313227
	3.5	-0.5	0.333333		1	-2	-0.666667	-0.666667	3.5	1	-5	-0.833333	-0.833333	2	-4	-0.666667	-0.666667	2	-1	-0.333333	-0.333333	5	0	0	0		-0.833333	-0.666667	-0.666667	-0.333333	0	-0.5	0.333333
	4	-0.346667	0.20629		1	-2	-0.666667	-0.666667	4	5	-1	-0.166667	-0.166667	5	-1	-0.166667	-0.166667	2	-1	-0.333333	-0.333333	3	-2	-0.4	-0.4		-0.166667	-0.666667	-0.166667	-0.333333	-0.4	-0.346667	0.20629
	4.5	1.11022e-17	0.62361		1	-2	-0.666667	-0.666667	4.5	12	6	1	1	6	0	0	0	2	-1	-0.333333	-0.333333	5	0	0	0		1	-0.666667	0	-0.333333	0	1.11022e-17	0.62361
	5	0.353333	0.967126		0	-3	-1	-1	5	11	5	0.833333	0.833333	8	2	0.333333	0.333333	3	0	0	0	13	8	1.6	1.6		0.833333	-1	0.333333	0	1.6	0.353333	0.967126
	5.5	-0.166667	0.763763		0	-3	-1	-1	5.5	12	6	1	1	5	-1	-0.166667	-0.166667	1	-2	-0.666667	-0.666667	5	0	0	0		1	-1	-0.166667	-0.666667	0	-0.166667	0.763763
	6	-0.2	0.397911		3	0	0	0	6	1	-5	-0.833333	-0.833333	7	1	0.166667	0.166667	2	-1	-0.333333	-0.333333	5	0	0	0		-0.833333	0	0.166667	-0.333333	0	-0.2	0.397911
	6.5	-0.48	0.356371		0	-3	-1	-1	6.5	5	-1	-0.166667	-0.166667	5	-1	-0.166667	-0.166667	1	-2	-0.666667	-0.666667	3	-2	-0.4	-0.4		-0.166667	-1	-0.166667	-0.666667	-0.4	-0.48	0.356371
	7	-0.393333	0.490125		0	-3	-1	-1	7	3	-3	-0.5	-0.5	6	0	0	0	1	-2	-0.666667	-0.666667	6	1	0.2	0.2		-0.5	-1	0	-0.666667	0.2	-0.393333	0.490125
	7.5	-0.533333	0.431406		0	-3	-1	-1	7.5	1	-5	-0.833333	-0.833333	5	-1	-0.166667	-0.166667	1	-2	-0.666667	-0.666667	5	0	0	0		-0.833333	-1	-0.166667	-0.666667	0	-0.533333	0.431406
	8	-0.54	0.424526		0	-3	-1	-1	8	1	-5	-0.833333	-0.833333	6	0	0	0	1	-2	-0.666667	-0.666667	4	-1	-0.2	-0.2		-0.833333	-1	0	-0.666667	-0.2	-0.54	0.424526
	8.5	-0.346667	0.425963		0	-3	-1	-1	8.5	7	1	0.166667	0.166667	5	-1	-0.166667	-0.166667	2	-1	-0.333333	-0.333333	3	-2	-0.4	-0.4		0.166667	-1	-0.166667	-0.333333	-0.4	-0.346667	0.425963
	9	-0.466667	0.361325		1	-2	-0.666667	-0.666667	9	1	-5	-0.833333	-0.833333	5	-1	-0.166667	-0.166667	1	-2	-0.666667	-0.666667	5	0	0	0		-0.833333	-0.666667	-0.166667	-0.666667	0	-0.466667	0.361325
	9.5	-0.166667	0.440959		1	-2	-0.666667	-0.666667	9.5	4	-2	-0.333333	-0.333333	9	3	0.5	0.5	2	-1	-0.333333	-0.333333	5	0	0	0		-0.333333	-0.666667	0.5	-0.333333	0	-0.166667	0.440959
	10	-0.28	0.30786		1	-2	-0.666667	-0.666667	10	7	1	0.166667	0.166667	5	-1	-0.166667	-0.166667	2	-1	-0.333333	-0.333333	3	-2	-0.4	-0.4		0.166667	-0.666667	-0.166667	-0.333333	-0.4	-0.28	0.30786
	10.5	-0.313333	0.651323		1	-2	-0.666667	-0.666667	10.5	2	-4	-0.666667	-0.666667	11	5	0.833333	0.833333	1	-2	-0.666667	-0.666667	3	-2	-0.4	-0.4		-0.666667	-0.666667	0.833333	-0.666667	-0.4	-0.313333	0.651323
	11	-0.44	0.29571		1	-2	-0.666667	-0.666667	11	1	-5	-0.833333	-0.833333	5	-1	-0.166667	-0.166667	2	-1	-0.333333	-0.333333	4	-1	-0.2	-0.2		-0.833333	-0.666667	-0.166667	-0.333333	-0.2	-0.44	0.29571
	11.5	0.406667	1.04839		8	5	1.66667	1.66667	11.5	14	8	1.33333	1.33333	5	-1	-0.166667	-0.166667	3	0	0	0	1	-4	-0.8	-0.8		1.33333	1.66667	-0.166667	0	-0.8	0.406667	1.04839
	12	3.20667	1.90823		20	17	5.66667	5.66667	12	21	15	2.5	2.5	12	6	1	1	17	14	4.66667	4.66667	16	11	2.2	2.2		2.5	5.66667	1	4.66667	2.2	3.20667	1.90823
	12.5	5.00667	2.36295		29	26	8.66667	8.66667	12.5	31	25	4.16667	4.16667	20	14	2.33333	2.33333	20	17	5.66667	5.66667	26	21	4.2	4.2		4.16667	8.66667	2.33333	5.66667	4.2	5.00667	2.36295
	13	6.29333	2.8416		36	33	11	11	13	42	36	6	6	32	26	4.33333	4.33333	22	19	6.33333	6.33333	24	19	3.8	3.8		6	11	4.33333	6.33333	3.8	6.29333	2.8416
	13.5	5.66	1.45304		26	23	7.66667	7.66667	13.5	36	30	5	5	31	25	4.16667	4.16667	23	20	6.66667	6.66667	29	24	4.8	4.8		5	7.66667	4.16667	6.66667	4.8	5.66	1.45304
	14	5.65333	2.46775		32	29	9.66667	9.66667	14	30	24	4	4	28	22	3.66667	3.66667	22	19	6.33333	6.33333	28	23	4.6	4.6		4	9.66667	3.66667	6.33333	4.6	5.65333	2.46775
	14.5	4.87333	1.4423		20	17	5.66667	5.66667	14.5	25	19	3.16667	3.16667	28	22	3.66667	3.66667	23	20	6.66667	6.66667	31	26	5.2	5.2		3.16667	5.66667	3.66667	6.66667	5.2	4.87333	1.4423
	15	5.76667	1.09036		21	18	6	6	15	41	35	5.83333	5.83333	30	24	4	4	24	21	7	7	35	30	6	6		5.83333	6	4	7	6	5.76667	1.09036
	15.5	6.88667	2.16097		34	31	10.3333	10.3333	15.5	36	30	5	5	37	31	5.16667	5.16667	25	22	7.33333	7.33333	38	33	6.6	6.6		5	10.3333	5.16667	7.33333	6.6	6.88667	2.16097
	16	6.84667	2.7092		36	33	11	11	16	29	23	3.83333	3.83333	44	38	6.33333	6.33333	26	23	7.66667	7.66667	32	27	5.4	5.4		3.83333	11	6.33333	7.66667	5.4	6.84667	2.7092
	16.5	6.44	2.55847		32	29	9.66667	9.66667	16.5	32	26	4.33333	4.33333	28	22	3.66667	3.66667	28	25	8.33333	8.33333	36	31	6.2	6.2		4.33333	9.66667	3.66667	8.33333	6.2	6.44	2.55847
	17	6.82	3.68342		41	38	12.6667	12.6667	17	27	21	3.5	3.5	32	26	4.33333	4.33333	27	24	8	8	33	28	5.6	5.6		3.5	12.6667	4.33333	8	5.6	6.82	3.68342
	17.5	6.82	1.73231		31	28	9.33333	9.33333	17.5	39	33	5.5	5.5	36	30	5	5	23	20	6.66667	6.66667	43	38	7.6	7.6		5.5	9.33333	5	6.66667	7.6	6.82	1.73231
	18	6.73333	3.218		36	33	11	11	18	24	18	3	3	40	34	5.66667	5.66667	30	27	9	9	30	25	5	5		3	11	5.66667	9	5	6.73333	3.218
	18.5	6.26667	3.8848		41	38	12.6667	12.6667	18.5	27	21	3.5	3.5	25	19	3.16667	3.16667	24	21	7	7	30	25	5	5		3.5	12.6667	3.16667	7	5	6.26667	3.8848
	19	5.80667	3.30289		37	34	11.3333	11.3333	19	30	24	4	4	25	19	3.16667	3.16667	22	19	6.33333	6.33333	26	21	4.2	4.2		4	11.3333	3.16667	6.33333	4.2	5.80667	3.30289
	19.5	6.36667	3.50079		40	37	12.3333	12.3333	19.5	35	29	4.83333	4.83333	26	20	3.33333	3.33333	22	19	6.33333	6.33333	30	25	5	5		4.83333	12.3333	3.33333	6.33333	5	6.36667	3.50079
	20	5.94	2.59405		32	29	9.66667	9.66667	20	32	26	4.33333	4.33333	29	23	3.83333	3.83333	26	23	7.66667	7.66667	26	21	4.2	4.2		4.33333	9.66667	3.83333	7.66667	4.2	5.94	2.59405
	20.5	6.16	2.80579		34	31	10.3333	10.3333	20.5	46	40	6.66667	6.66667	26	20	3.33333	3.33333	23	20	6.66667	6.66667	24	19	3.8	3.8		6.66667	10.3333	3.33333	6.66667	3.8	6.16	2.80579
	21	5.39333	2.43269		28	25	8.33333	8.33333	21	24	18	3	3	23	17	2.83333	2.83333	24	21	7	7	34	29	5.8	5.8		3	8.33333	2.83333	7	5.8	5.39333	2.43269
	21.5	5.24	2.742		32	29	9.66667	9.66667	21.5	27	21	3.5	3.5	23	17	2.83333	2.83333	21	18	6	6	26	21	4.2	4.2		3.5	9.66667	2.83333	6	4.2	5.24	2.742
	22	5.42	2.50971		31	28	9.33333	9.33333	22	29	23	3.83333	3.83333	24	18	3	3	22	19	6.33333	6.33333	28	23	4.6	4.6		3.83333	9.33333	3	6.33333	4.6	5.42	2.50971
	22.5	5.49333	2.59598		25	22	7.33333	7.33333	22.5	34	28	4.66667	4.66667	28	22	3.66667	3.66667	30	27	9	9	19	14	2.8	2.8		4.66667	7.33333	3.66667	9	2.8	5.49333	2.59598
	23	5	3.66477		37	34	11.3333	11.3333	23	25	19	3.16667	3.16667	21	15	2.5	2.5	18	15	5	5	20	15	3	3		3.16667	11.3333	2.5	5	3	5	3.66477
	23.5	4.50667	1.85748		21	18	6	6	23.5	24	18	3	3	26	20	3.33333	3.33333	24	21	7	7	21	16	3.2	3.2		3	6	3.33333	7	3.2	4.50667	1.85748
	24	4.54	2.13365		25	22	7.33333	7.33333	24	25	19	3.16667	3.16667	22	16	2.66667	2.66667	22	19	6.33333	6.33333	21	16	3.2	3.2		3.16667	7.33333	2.66667	6.33333	3.2	4.54	2.13365
	24.5	4.86	2.77052		31	28	9.33333	9.33333	24.5	22	16	2.66667	2.66667	23	17	2.83333	2.83333	20	17	5.66667	5.66667	24	19	3.8	3.8		2.66667	9.33333	2.83333	5.66667	3.8	4.86	2.77052
	25	4.34	1.95653		26	23	7.66667	7.66667	25	31	25	4.16667	4.16667	22	16	2.66667	2.66667	15	12	4	4	21	16	3.2	3.2		4.16667	7.66667	2.66667	4	3.2	4.34	1.95653
	25.5	3.86	2.39402		25	22	7.33333	7.33333	25.5	18	12	2	2	17	11	1.83333	1.83333	19	16	5.33333	5.33333	19	14	2.8	2.8		2	7.33333	1.83333	5.33333	2.8	3.86	2.39402
	26	4.92667	1.76043		26	23	7.66667	7.66667	26	32	26	4.33333	4.33333	35	29	4.83333	4.83333	18	15	5	5	19	14	2.8	2.8		4.33333	7.66667	4.83333	5	2.8	4.92667	1.76043
	26.5	4.28667	3.52054		33	30	10	10	26.5	15	9	1.5	1.5	18	12	2	2	19	16	5.33333	5.33333	18	13	2.6	2.6		1.5	10	2	5.33333	2.6	4.28667	3.52054
	27	4.52	2.48312		28	25	8.33333	8.33333	27	27	21	3.5	3.5	21	15	2.5	2.5	20	17	5.66667	5.66667	18	13	2.6	2.6		3.5	8.33333	2.5	5.66667	2.6	4.52	2.48312
	27.5	3.45333	1.31437		18	15	5	5	27.5	24	18	3	3	18	12	2	2	17	14	4.66667	4.66667	18	13	2.6	2.6		3	5	2	4.66667	2.6	3.45333	1.31437
	28	3.46	1.15576		19	16	5.33333	5.33333	28	25	19	3.16667	3.16667	20	14	2.33333	2.33333	14	11	3.66667	3.66667	19	14	2.8	2.8		3.16667	5.33333	2.33333	3.66667	2.8	3.46	1.15576
	28.5	4.67333	2.61729		31	28	9.33333	9.33333	28.5	29	23	3.83333	3.83333	26	20	3.33333	3.33333	14	11	3.66667	3.66667	21	16	3.2	3.2		3.83333	9.33333	3.33333	3.66667	3.2	4.67333	2.61729
	29	3.54	1.12901		18	15	5	5	29	26	20	3.33333	3.33333	23	17	2.83333	2.83333	16	13	4.33333	4.33333	16	11	2.2	2.2		3.33333	5	2.83333	4.33333	2.2	3.54	1.12901
	29.5	3.69333	2.04551		24	21	7	7	29.5	19	13	2.16667	2.16667	17	11	1.83333	1.83333	14	11	3.66667	3.66667	24	19	3.8	3.8		2.16667	7	1.83333	3.66667	3.8	3.69333	2.04551
	30	2.95333	0.980249		16	13	4.33333	4.33333	30	16	10	1.66667	1.66667	23	17	2.83333	2.83333	13	10	3.33333	3.33333	18	13	2.6	2.6		1.66667	4.33333	2.83333	3.33333	2.6	2.95333	0.980249
	30.5	2.79333	0.898888		13	10	3.33333	3.33333	30.5	15	9	1.5	1.5	20	14	2.33333	2.33333	12	9	3	3	24	19	3.8	3.8		1.5	3.33333	2.33333	3	3.8	2.79333	0.898888
	31	4.1	1.94222		25	22	7.33333	7.33333	31	22	16	2.66667	2.66667	21	15	2.5	2.5	15	12	4	4	25	20	4	4		2.66667	7.33333	2.5	4	4	4.1	1.94222
	31.5	2.5	0.745356		12	9	3	3	31.5	22	16	2.66667	2.66667	15	9	1.5	1.5	13	10	3.33333	3.33333	15	10	2	2		2.66667	3	1.5	3.33333	2	2.5	0.745356
	32	2.42667	1.16866		15	12	4	4	32	16	10	1.66667	1.66667	14	8	1.33333	1.33333	13	10	3.33333	3.33333	14	9	1.8	1.8		1.66667	4	1.33333	3.33333	1.8	2.42667	1.16866
	32.5	3.62	3.04864		30	27	9	9	32.5	23	17	2.83333	2.83333	18	12	2	2	11	8	2.66667	2.66667	13	8	1.6	1.6		2.83333	9	2	2.66667	1.6	3.62	3.04864
	33	2.42	1.05082		15	12	4	4	33	14	8	1.33333	1.33333	21	15	2.5	2.5	11	8	2.66667	2.66667	13	8	1.6	1.6		1.33333	4	2.5	2.66667	1.6	2.42	1.05082
	33.5	1.88	0.337145		9	6	2	2	33.5	17	11	1.83333	1.83333	17	11	1.83333	1.83333	10	7	2.33333	2.33333	12	7	1.4	1.4		1.83333	2	1.83333	2.33333	1.4	1.88	0.337145
	34	1.88667	0.728621		12	9	3	3	34	17	11	1.83333	1.83333	12	6	1	1	9	6	2	2	13	8	1.6	1.6		1.83333	3	1	2	1.6	1.88667	0.728621
	34.5	2.58	2.14963		22	19	6.33333	6.33333	34.5	19	13	2.16667	2.16667	12	6	1	1	9	6	2	2	12	7	1.4	1.4		2.16667	6.33333	1	2	1.4	2.58	2.14963
	35	2.33333	1.55009		15	12	4	4	35	13	7	1.16667	1.16667	11	5	0.833333	0.833333	8	5	1.66667	1.66667	25	20	4	4		1.16667	4	0.833333	1.66667	4	2.33333	1.55009
	35.5	2.46	1.39929		17	14	4.66667	4.66667	35.5	19	13	2.16667	2.16667	12	6	1	1	8	5	1.66667	1.66667	19	14	2.8	2.8		2.16667	4.66667	1	1.66667	2.8	2.46	1.39929
	36	2.00667	1.88568		19	16	5.33333	5.33333	36	12	6	1	1	11	5	0.833333	0.833333	8	5	1.66667	1.66667	11	6	1.2	1.2		1	5.33333	0.833333	1.66667	1.2	2.00667	1.88568
	36.5	2.90667	2.19386		23	20	6.66667	6.66667	36.5	21	15	2.5	2.5	15	9	1.5	1.5	11	8	2.66667	2.66667	11	6	1.2	1.2		2.5	6.66667	1.5	2.66667	1.2	2.90667	2.19386
	37	2.34667	2.07386		21	18	6	6	37	12	6	1	1	18	12	2	2	7	4	1.33333	1.33333	12	7	1.4	1.4		1	6	2	1.33333	1.4	2.34667	2.07386
	37.5	2.02667	0.87127		13	10	3.33333	3.33333	37.5	16	10	1.66667	1.66667	12	6	1	1	10	7	2.33333	2.33333	14	9	1.8	1.8		1.66667	3.33333	1	2.33333	1.8	2.02667	0.87127
	38	1.94667	0.914573		13	10	3.33333	3.33333	38	20	14	2.33333	2.33333	16	10	1.66667	1.66667	6	3	1	1	12	7	1.4	1.4		2.33333	3.33333	1.66667	1	1.4	1.94667	0.914573
	38.5	1.64667	0.663995		10	7	2.33333	2.33333	38.5	19	13	2.16667	2.16667	10	4	0.666667	0.666667	8	5	1.66667	1.66667	12	7	1.4	1.4		2.16667	2.33333	0.666667	1.66667	1.4	1.64667	0.663995
	39	1.48	0.458621		9	6	2	2	39	17	11	1.83333	1.83333	11	5	0.833333	0.833333	7	4	1.33333	1.33333	12	7	1.4	1.4		1.83333	2	0.833333	1.33333	1.4	1.48	0.458621
	39.5	1.75333	1.15653		12	9	3	3	39.5	12	6	1	1	13	7	1.16667	1.16667	12	9	3	3	8	3	0.6	0.6		1	3	1.16667	3	0.6	1.75333	1.15653
	40	1.46	1.45381		14	11	3.66667	3.66667	40	5	-1	-0.166667	-0.166667	12	6	1	1	9	6	2	2	9	4	0.8	0.8		-0.166667	3.66667	1	2	0.8	1.46	1.45381
	40.5	0.926667	0.788247		3	0	0	0	40.5	19	13	2.16667	2.16667	10	4	0.666667	0.666667	6	3	1	1	9	4	0.8	0.8		2.16667	0	0.666667	1	0.8	0.926667	0.788247
	41	1.55333	1.39356		15	12	4	4	41	14	8	1.33333	1.33333	11	5	0.833333	0.833333	6	3	1	1	8	3	0.6	0.6		1.33333	4	0.833333	1	0.6	1.55333	1.39356
	41.5	0.933333	0.65192		4	1	0.333333	0.333333	41.5	11	5	0.833333	0.833333	9	3	0.5	0.5	6	3	1	1	15	10	2	2		0.833333	0.333333	0.5	1	2	0.933333	0.65192
	42	0.913333	0.930233		10	7	2.33333	2.33333	42	6	0	0	0	9	3	0.5	0.5	7	4	1.33333	1.33333	7	2	0.4	0.4		0	2.33333	0.5	1.33333	0.4	0.913333	0.930233
	42.5	1.40667	1.33924		14	11	3.66667	3.66667	42.5	13	7	1.16667	1.16667	10	4	0.666667	0.666667	7	4	1.33333	1.33333	6	1	0.2	0.2		1.16667	3.66667	0.666667	1.33333	0.2	1.40667	1.33924
	43	1.02	0.396933		5	2	0.666667	0.666667	43	15	9	1.5	1.5	14	8	1.33333	1.33333	6	3	1	1	8	3	0.6	0.6		1.5	0.666667	1.33333	1	0.6	1.02	0.396933
	43.5	1.50667	0.969077		8	5	1.66667	1.66667	43.5	24	18	3	3	8	2	0.333333	0.333333	7	4	1.33333	1.33333	11	6	1.2	1.2		3	1.66667	0.333333	1.33333	1.2	1.50667	0.969077
	44	1.29333	0.735754		9	6	2	2	44	18	12	2	2	8	2	0.333333	0.333333	7	4	1.33333	1.33333	9	4	0.8	0.8		2	2	0.333333	1.33333	0.8	1.29333	0.735754
	44.5	1.36	1.51866		15	12	4	4	44.5	7	1	0.166667	0.166667	13	7	1.16667	1.16667	5	2	0.666667	0.666667	9	4	0.8	0.8		0.166667	4	1.16667	0.666667	0.8	1.36	1.51866
	45	1.32	0.787612		8	5	1.66667	1.66667	45	13	7	1.16667	1.16667	21	15	2.5	2.5	5	2	0.666667	0.666667	8	3	0.6	0.6		1.16667	1.66667	2.5	0.666667	0.6	1.32	0.787612
	45.5	0.973333	0.451171		5	2	0.666667	0.666667	45.5	10	4	0.666667	0.666667	16	10	1.66667	1.66667	5	2	0.666667	0.666667	11	6	1.2	1.2		0.666667	0.666667	1.66667	0.666667	1.2	0.973333	0.451171
	46	1.08	1.26877		13	10	3.33333	3.33333	46	10	4	0.666667	0.666667	8	2	0.333333	0.333333	5	2	0.666667	0.666667	7	2	0.4	0.4		0.666667	3.33333	0.333333	0.666667	0.4	1.08	1.26877
	46.5	1.48	1.0616		10	7	2.33333	2.33333	46.5	21	15	2.5	2.5	5	-1	-0.166667	-0.166667	7	4	1.33333	1.33333	12	7	1.4	1.4		2.5	2.33333	-0.166667	1.33333	1.4	1.48	1.0616
	47	0.96	0.968791		10	7	2.33333	2.33333	47	15	9	1.5	1.5	7	1	0.166667	0.166667	3	0	0	0	9	4	0.8	0.8		1.5	2.33333	0.166667	0	0.8	0.96	0.968791
	47.5	0.0533333	0.357926		2	-1	-0.333333	-0.333333	47.5	5	-1	-0.166667	-0.166667	7	1	0.166667	0.166667	3	0	0	0	8	3	0.6	0.6		-0.166667	-0.333333	0.166667	0	0.6	0.0533333	0.357926
	48	0.493333	0.521962		2	-1	-0.333333	-0.333333	48	10	4	0.666667	0.666667	8	2	0.333333	0.333333	6	3	1	1	9	4	0.8	0.8		0.666667	-0.333333	0.333333	1	0.8	0.493333	0.521962
	48.5	0.14	0.545894		1	-2	-0.666667	-0.666667	48.5	11	5	0.833333	0.833333	6	0	0	0	4	1	0.333333	0.333333	6	1	0.2	0.2		0.833333	-0.666667	0	0.333333	0.2	0.14	0.545894
	49	0.773333	0.62245		8	5	1.66667	1.66667	49	13	7	1.16667	1.16667	9	3	0.5	0.5	4	1	0.333333	0.333333	6	1	0.2	0.2		1.16667	1.66667	0.5	0.333333	0.2	0.773333	0.62245
	49.5	0.273333	0.478656		2	-1	-0.333333	-0.333333	49.5	7	1	0.166667	0.166667	8	2	0.333333	0.333333	6	3	1	1	6	1	0.2	0.2		0.166667	-0.333333	0.333333	1	0.2	0.273333	0.478656
	50	0.2	1.02334		9	6	2	2	50	3	-3	-0.5	-0.5	5	-1	-0.166667	-0.166667	2	-1	-0.333333	-0.333333	5	0	0	0		-0.5	2	-0.166667	-0.333333	0	0.2	1.02334
	50.5	0.14	0.432306		5	2	0.666667	0.666667	50.5	3	-3	-0.5	-0.5	6	0	0	0	4	1	0.333333	0.333333	6	1	0.2	0.2		-0.5	0.666667	0	0.333333	0.2	0.14	0.432306
	51	0.306667	0.580421		7	4	1.33333	1.33333	51	6	0	0	0	6	0	0	0	3	0	0	0	6	1	0.2	0.2		0	1.33333	0	0	0.2	0.306667	0.580421
	51.5	-0.0333333	0.477261		1	-2	-0.666667	-0.666667	51.5	5	-1	-0.166667	-0.166667	6	0	0	0	5	2	0.666667	0.666667	5	0	0	0		-0.166667	-0.666667	0	0.666667	0	-0.0333333	0.477261
	52	0.646667	0.40387		5	2	0.666667	0.666667	52	14	8	1.33333	1.33333	9	3	0.5	0.5	4	1	0.333333	0.333333	7	2	0.4	0.4		1.33333	0.666667	0.5	0.333333	0.4	0.646667	0.40387
	52.5	0.686667	0.417399		7	4	1.33333	1.33333	52.5	8	2	0.333333	0.333333	11	5	0.833333	0.833333	4	1	0.333333	0.333333	8	3	0.6	0.6		0.333333	1.33333	0.833333	0.333333	0.6	0.686667	0.417399
	53	0.2	1.01653		2	-1	-0.333333	-0.333333	53	18	12	2	2	4	-2	-0.333333	-0.333333	2	-1	-0.333333	-0.333333	5	0	0	0		2	-0.333333	-0.333333	-0.333333	0	0.2	1.01653
	53.5	0.306667	0.530409		2	-1	-0.333333	-0.333333	53.5	12	6	1	1	6	0	0	0	5	2	0.666667	0.666667	6	1	0.2	0.2		1	-0.333333	0	0.666667	0.2	0.306667	0.530409
	54	-0.0666667	0.494413		5	2	0.666667	0.666667	54	2	-4	-0.666667	-0.666667	6	0	0	0	2	-1	-0.333333	-0.333333	5	0	0	0		-0.666667	0.666667	0	-0.333333	0	-0.0666667	0.494413
	54.5	0.34	0.562929		4	1	0.333333	0.333333	54.5	12	6	1	1	3	-3	-0.5	-0.5	5	2	0.666667	0.666667	6	1	0.2	0.2		1	0.333333	-0.5	0.666667	0.2	0.34	0.562929
	55	0.0466667	0.268328		2	-1	-0.333333	-0.333333	55	7	1	0.166667	0.166667	6	0	0	0	3	0	0	0	7	2	0.4	0.4		0.166667	-0.333333	0	0	0.4	0.0466667	0.268328
	55.5	-0.06	0.30948		2	-1	-0.333333	-0.333333	55.5	5	-1	-0.166667	-0.166667	8	2	0.333333	0.333333	2	-1	-0.333333	-0.333333	6	1	0.2	0.2		-0.166667	-0.333333	0.333333	-0.333333	0.2	-0.06	0.30948
	56	-0.0666667	0.190029		2	-1	-0.333333	-0.333333	56	7	1	0.166667	0.166667	5	-1	-0.166667	-0.166667	3	0	0	0	5	0	0	0		0.166667	-0.333333	-0.166667	0	0	-0.0666667	0.190029
	56.5	-0.293333	0.31127		1	-2	-0.666667	-0.666667	56.5	4	-2	-0.333333	-0.333333	4	-2	-0.333333	-0.333333	2	-1	-0.333333	-0.333333	6	1	0.2	0.2		-0.333333	-0.666667	-0.333333	-0.333333	0.2	-0.293333	0.31127
	57	0.853333	0.777675		8	5	1.66667	1.66667	57	9	3	0.5	0.5	5	-1	-0.166667	-0.166667	5	2	0.666667	0.666667	13	8	1.6	1.6		0.5	1.66667	-0.166667	0.666667	1.6	0.853333	0.777675
	57.5	-0.133333	0.380058		1	-2	-0.666667	-0.666667	57.5	8	2	0.333333	0.333333	4	-2	-0.333333	-0.333333	3	0	0	0	5	0	0	0		0.333333	-0.666667	-0.333333	0	0	-0.133333	0.380058
	58	0.506667	0.693381		7	4	1.33333	1.33333	58	13	7	1.16667	1.16667	5	-1	-0.166667	-0.166667	3	0	0	0	6	1	0.2	0.2		1.16667	1.33333	-0.166667	0	0.2	0.506667	0.693381
	58.5	0.106667	0.255386		3	0	0	0	58.5	9	3	0.5	0.5	5	-1	-0.166667	-0.166667	3	0	0	0	6	1	0.2	0.2		0.5	0	-0.166667	0	0.2	0.106667	0.255386
	59	-0.4	0.278887		1	-2	-0.666667	-0.666667	59	2	-4	-0.666667	-0.666667	4	-2	-0.333333	-0.333333	2	-1	-0.333333	-0.333333	5	0	0	0		-0.666667	-0.666667	-0.333333	-0.333333	0	-0.4	0.278887
	59.5	-0.166667	0.527046		5	2	0.666667	0.666667	59.5	2	-4	-0.666667	-0.666667	3	-3	-0.5	-0.5	2	-1	-0.333333	-0.333333	5	0	0	0		-0.666667	0.666667	-0.5	-0.333333	0	-0.166667	0.527046
	60	-0.406667	0.245402		1	-2	-0.666667	-0.666667	60	2	-4	-0.666667	-0.666667	5	-1	-0.166667	-0.166667	2	-1	-0.333333	-0.333333	4	-1	-0.2	-0.2		-0.666667	-0.666667	-0.166667	-0.333333	-0.2	-0.406667	0.245402
								12.6667					6.66667	5			6.33333				9	5			7.6
														0								0

## Sheet: 900mVpp 1s
	Time	Average	Stdev									Average	Stdev
	0.5	-0.26	0.371484				-0.5	-0.8	0	0	0	-0.26	0.371484
	1	0.191317	0.706743				-0.5	-0.00504	1.33333	0.333333	-0.20504	0.191317	0.706743
	1.5	-0.405659	0.440775				-0.4916	-0.8	-0.666667	0.333333	-0.40336	-0.405659	0.440775
	2	-0.239748	0.35941				0.0063	-0.8	0	0	-0.40504	-0.239748	0.35941
	2.5	-0.165433	0.56909				-0.5	0.75294	-0.666667	0	-0.41344	-0.165433	0.56909
	3	-0.337985	0.614561				0.718475	-0.8	-0.666667	-0.333333	-0.6084	-0.337985	0.614561
	3.5	-0.0453197	0.591488				0.936975	-0.61008	-0.333333	0	-0.22016	-0.0453197	0.591488
	4	-0.328824	0.436882				-0.2206	-0.81176	0.333333	-0.333333	-0.61176	-0.328824	0.436882
	4.5	-0.336048	0.433142				-0.2668	-0.81344	-0.333333	0.333333	-0.6	-0.336048	0.433142
	5	-0.275605	0.555055				-0.4811	-0.8	0.666667	-0.333333	-0.43026	-0.275605	0.555055
	5.5	-0.350027	0.362519				0	-0.8168	0	-0.333333	-0.6	-0.350027	0.362519
	6	-0.489805	0.176443				-0.7269	-0.61848	-0.333333	-0.333333	-0.43698	-0.489805	0.176443
	6.5	-0.627979	0.180578				-0.699575	-0.82016	-0.666667	-0.333333	-0.62016	-0.627979	0.180578
	7	-0.512016	0.231372				-0.4727	-0.82184	-0.666667	-0.333333	-0.26554	-0.512016	0.231372
	7.5	-0.554116	0.192601				-0.5	-0.82352	-0.666667	-0.333333	-0.44706	-0.554116	0.192601
	8	-0.143779	0.699819				-0.468475	-0.8	1	0	-0.45042	-0.143779	0.699819
	8.5	-0.58538	0.176925				-0.5	-0.8	-0.666667	-0.333333	-0.6269	-0.58538	0.176925
	9	-0.436194	0.209889				-0.285725	-0.8	-0.333333	-0.333333	-0.42858	-0.436194	0.209889
	9.5	-0.65182	0.297063				-0.962175	-0.83026	-0.333333	-0.333333	-0.8	-0.65182	0.297063
	10	-0.625827	0.148226				-0.5	-0.83194	-0.666667	-0.666667	-0.46386	-0.625827	0.148226
	10.5	0.156414	1.26744				-0.084025	-0.83362	2.33333	0	-0.63362	0.156414	1.26744
	11	0.33314	0.771734				1.54413	0.49412	-0.333333	-0.333333	0.29412	0.33314	0.771734
	11.5	3.02712	1.48396				5.45378	2.92606	2	1.66667	3.08908	3.02712	1.48396
	12	5.88504	1.95817				8.2185	3.92268	7.66667	5.33333	4.28404	5.88504	1.95817
	12.5	5.61818	1.26745				6.19958	4.079	7	6.33333	4.479	5.61818	1.26745
	13	5.45283	1.66331				6.19747	3.2	6.66667	7	4.2	5.45283	1.66331
	13.5	5.39686	1.34236				7.11765	4.0689	5.33333	6.33333	4.1311	5.39686	1.34236
	14	5.43456	1.6685				6.46638	3.55462	7.33333	6	3.81848	5.43456	1.6685
	14.5	5.48608	1.78111				5.4853	3.75294	8	6.33333	3.85882	5.48608	1.78111
	15	4.95843	0.761953				5	4.10252	5.33333	6	4.3563	4.95843	0.761953
	15.5	5.28244	1.53682				6.06093	3.34958	7	6	4.00168	5.28244	1.53682
	16	4.79905	1.08274				4.94538	3.7916	5.66667	6	3.5916	4.79905	1.08274
	16.5	5.02213	1.65822				4.7689	3.62352	7.33333	6	3.38488	5.02213	1.65822
	17	5.6563	2.44511				5.18067	3.17816	9.33333	6.66667	3.92268	5.6563	2.44511
	17.5	4.94285	2.21486				4.71427	3.02858	8.33333	5.66667	2.97142	4.94285	2.21486
	18	5.27667	1.78099				5.66177	3.92942	8	5.33333	3.45882	5.27667	1.78099
	18.5	4.77504	2.24556				5.79622	2.0605	7.66667	5.33333	3.01848	4.77504	2.24556
	19	4.15669	1.64518				3.82773	2.53782	6.33333	5.33333	2.75126	4.15669	1.64518
	19.5	4.23364	1.83214				4.09032	3.0084	7.33333	4	2.73614	4.23364	1.83214
	20	3.80163	1.46751				3.66807	2.2689	6	4.33333	2.73782	3.80163	1.46751
	20.5	4.06381	1.61162				3.92018	2.13278	6	5.33333	2.93278	4.06381	1.61162
	21	4.02162	1.68955				5.31933	1.9311	5.66667	4.66667	2.52436	4.02162	1.68955
	21.5	4.06392	1.99357				3.67647	2.58824	7.33333	4.33333	2.38824	4.06392	1.99357
	22	4.26717	2.36538				4.45798	1.8	8	4.33333	2.74454	4.26717	2.36538
	22.5	3.61345	2.09535				3.18487	1.6521	7	4	2.23026	3.61345	2.09535
	23	3.5384	1.96597				4.21638	1.15126	6.33333	3.66667	2.32436	3.5384	1.96597
	23.5	3.37599	1.77011				2.7332	1.92268	6	4.33333	1.89076	3.37599	1.77011
	24	3.55202	2.44262				3.35505	1.64202	7.66667	3.33333	1.76302	3.55202	2.44262
	24.5	3.44042	1.88189				4.04413	1.51932	6	4	1.63866	3.44042	1.88189
	25	3.62647	1.91929				3.7794	1.8	5.66667	5.33333	1.55294	3.62647	1.91929
	25.5	2.61073	1.3165				2.7752	1.23194	4.33333	3.33333	1.37984	2.61073	1.3165
	26	2.94524	1.90934				2.53572	0.45714	5.66667	3.66667	2.4	2.94524	1.90934
	26.5	2.83697	2.34077				2.10925	1.0252	6.66667	3.33333	1.05042	2.83697	2.34077
	27	3.19037	1.4076				4.66387	1.55462	4.66667	2.66667	2.4	3.19037	1.4076
	27.5	2.88865	1.78441				3.56933	1.30924	5.66667	2.33333	1.5647	2.88865	1.78441
	28	2.35854	1.704				2.40335	0.69244	5	2.66667	1.03026	2.35854	1.704
	28.5	2.25941	1.37335				2.25	0.91764	4.33333	2.66667	1.12942	2.25941	1.37335
	29	2.14314	1.13318				1.86975	1.3042	4	2.33333	1.2084	2.14314	1.13318
	29.5	1.26664	0.895583				2.12815	0.39496	0.666667	2.33333	0.81008	1.26664	0.895583
	30	1.89667	1.13329				2.2458	0.80168	3.66667	1.66667	1.10252	1.89667	1.13329
	30.5	2.36401	2.555				2.2542	0.2	6.66667	2	0.69916	2.36401	2.555
	31	1.44681	1.19675				3.34665	0.59496	1.33333	1.66667	0.29244	1.44681	1.19675
	31.5	1.62992	1.23407				2.479	0.3832	3	2	0.2874	1.62992	1.23407
	32	1.45785	1.28603				2.66178	-0.18824	2.66667	1.66667	0.48236	1.45785	1.28603
	32.5	1.38235	1.24437				1.63445	0	3	2	0.27732	1.38235	1.24437
	33	1.54781	1.29609				1.70377	0.38152	3.66667	1.33333	0.65378	1.54781	1.29609
	33.5	1.31445	1.00737				1.41597	0.46722	3	1	0.68908	1.31445	1.00737
	34	1.46311	1.63941				1.14075	-0.17478	4	2	0.34958	1.46311	1.63941
	34.5	1.67857	1.59334				1.25	0.08572	4.33333	1.66667	1.05714	1.67857	1.59334
	35	1.0507	1.18319				0.5	0.16806	3	1.33333	0.2521	1.0507	1.18319
	35.5	1.32941	2.1424				1	-0.4353	5	1	0.08236	1.32941	2.1424
	36	1.32751	1.23352				1.5042	0.08068	3.33333	1	0.71932	1.32751	1.23352
	36.5	0.967253	1.29703				2.14495	-0.6	2.33333	1	-0.04202	0.967253	1.29703
	37	0.389723	0.634743				0.86345	-0.36806	1	0.666667	-0.21344	0.389723	0.634743
	37.5	0.759217	0.819126				1	-0.1731	2	0.666667	0.30252	0.759217	0.819126
	38	0.877393	1.2786				0.565125	-0.2521	3	1	0.07394	0.877393	1.2786
	38.5	0.812773	1.07198				1.31933	-0.47226	2.33333	0.666667	0.2168	0.812773	1.07198
	39	0.495494	0.728377				0.661775	-0.25882	1.33333	1	-0.25882	0.495494	0.728377
	39.5	0.570451	1.15447				0.25	-0.6689	2.33333	1	-0.06218	0.570451	1.15447
	40	0.136361	0.583161				0.7479	-0.66722	0	0.666667	-0.06554	0.136361	0.583161
	40.5	0.769388	1.38019				0.918075	-0.4689	3	0.666667	-0.2689	0.769388	1.38019
	41	0.604425	1.45982				0.5	-0.6	3	0.666667	-0.54454	0.604425	1.45982
	41.5	0.44798	1.13264				1.2668	-0.47564	2	0	-0.55126	0.44798	1.13264
	42	0.628878	1.06256				1.29623	-0.5395	2	0.666667	-0.279	0.628878	1.06256
	42.5	0.114511	0.390611				0.35295	-0.28236	0.666667	0	-0.1647	0.114511	0.390611
	43	0.156187	0.698219				1.14285	-0.6	0.333333	0.333333	-0.42858	0.156187	0.698219
	43.5	0.0238363	0.52571				0.430675	-0.48908	0.666667	0	-0.48908	0.0238363	0.52571
	44	0.0796907	0.792245				0.25	-0.6	1.33333	0	-0.58488	0.0796907	0.792245
	44.5	-0.106023	0.495941				0.38025	-0.5479	0	0.333333	-0.6958	-0.106023	0.495941
	45	0.528067	1.31854				0.689075	-0.74958	2.66667	0.333333	-0.29916	0.528067	1.31854
	45.5	-0.122689	0.606113				-0.310925	-0.8	0.333333	0.666667	-0.50252	-0.122689	0.606113
	46	-0.113137	0.578604				0.13235	-0.75294	0.666667	0	-0.61176	-0.113137	0.578604
	46.5	-0.329158	0.393682				-0.13655	-0.8	0	0	-0.70924	-0.329158	0.393682
	47	-0.00896333	0.813815				-0.10925	-0.8	1.33333	0	-0.4689	-0.00896333	0.813815
	47.5	-0.571596	0.175561				-0.5	-0.8	-0.666667	-0.333333	-0.55798	-0.571596	0.175561
	48	-0.249214	0.54361				-0.300425	-0.75966	0.666667	-0.333333	-0.51932	-0.249214	0.54361
	48.5	-0.455601	0.224701				-0.25	-0.8	-0.333333	-0.333333	-0.56134	-0.455601	0.224701
	49	-0.490394	0.331332				-0.296225	-0.76302	-0.666667	0	-0.72606	-0.490394	0.331332
	49.5	0.134116	1.44792				0	-0.8	2.66667	-0.666667	-0.52942	0.134116	1.44792
	50	-0.23787	0.590246				0.210075	-0.96638	0.333333	0	-0.76638	-0.23787	0.590246
	50.5	-0.467507	0.351029				-0.5	-0.96806	-0.333333	0	-0.53614	-0.467507	0.351029
	51	0.074535	1.27884				-0.287825	-0.8	2.33333	-0.333333	-0.5395	0.074535	1.27884
	51.5	-0.446667	0.301478				-0.5	-0.8	0	-0.333333	-0.6	-0.446667	0.301478
	52	-0.342573	0.594588				-0.5	-0.7731	0.666667	-0.333333	-0.7731	-0.342573	0.594588
	52.5	0.015296	0.933691				-0.5	-0.67394	1.33333	0.666667	-0.74958	0.015296	0.933691
	53	-0.295884	0.939958				-0.75	-0.97648	1.33333	-0.333333	-0.75294	-0.295884	0.939958
	53.5	-0.621264	0.268334				-0.75	-0.97816	-0.666667	-0.333333	-0.37816	-0.621264	0.268334
	54	-0.559832	0.170543				-0.5	-0.77984	-0.333333	-0.666667	-0.51932	-0.559832	0.170543
	54.5	-0.652608	0.250112				-0.5	-0.98152	-0.666667	-0.333333	-0.78152	-0.652608	0.250112
	55	-0.569665	0.360472				-0.081925	-0.9832	-0.666667	-0.333333	-0.7832	-0.569665	0.360472
	55.5	-0.441065	0.663343				-0.7689	-0.98488	0.666667	-0.333333	-0.78488	-0.441065	0.663343
	56	-0.591313	0.374484				-0.5168	-1	-0.666667	0	-0.7731	-0.591313	0.374484
	56.5	-0.574315	0.400326				-0.75	-0.98824	0	-0.333333	-0.8	-0.574315	0.400326
	57	-0.650928	0.258055				-0.4748	-0.98992	-0.666667	-0.333333	-0.78992	-0.650928	0.258055
	57.5	-0.588293	0.37439				-0.5	-0.9916	0	-0.666667	-0.7832	-0.588293	0.37439
	58	-0.572299	0.399797				-0.7416	-0.99328	0	-0.333333	-0.79328	-0.572299	0.399797
	58.5	-0.815659	0.290285				-0.75	-1	-1	-0.333333	-0.99496	-0.815659	0.290285
	59	-0.493669	0.462032				-0.0084	-0.99664	0	-0.666667	-0.79664	-0.493669	0.462032
	59.5	-0.775995	0.272365				-0.75	-0.99832	-1	-0.333333	-0.79832	-0.775995	0.272365
	60	-0.866667	0.182574				-1	-1	-0.666667	-0.666667	-1	-0.866667	0.182574

## Sheet: 900mVpp 1s PcTx1
Time	Control	PcTx1-50nM	Stdev control	Stdev PcTx																												Average	Stdev
0.5	-0.26	0	0.371484	0																							0	0	0	0	0	0	0
1	0.191317	-0.075	0.706743	0.111803																							-0.125	0	0	0	-0.25	-0.075	0.111803
1.5	-0.405659	-0.0555556	0.440775	0.266435																							0	0	0	0.222222	-0.5	-0.0555556	0.266435
2	-0.239748	-0.212374	0.35941	0.316623																							-0.125	-0.166667	0.0909091	-0.111111	-0.75	-0.212374	0.316623
2.5	-0.165433	-0.123737	0.56909	0.0926461																							0	-0.166667	-0.0909091	-0.111111	-0.25	-0.123737	0.0926461
3	-0.337985	-0.115404	0.614561	0.234331																							0.125	-0.5	-0.0909091	-0.111111	0	-0.115404	0.234331
3.5	-0.0453197	-0.236364	0.591488	0.344942																							-0.5	0.333333	-0.181818	-0.333333	-0.5	-0.236364	0.344942
4	-0.328824	-0.223737	0.436882	0.16628																							-0.25	-0.166667	-0.0909091	-0.111111	-0.5	-0.223737	0.16628
4.5	-0.336048	-0.0752525	0.433142	0.190002																							0	-0.166667	-0.181818	0.222222	-0.25	-0.0752525	0.190002
5	-0.275605	-0.151515	0.555055	0.206917																							0	-0.166667	-0.0909091	0	-0.5	-0.151515	0.206917
5.5	-0.350027	-0.319697	0.362519	0.119111																							-0.25	-0.333333	-0.181818	-0.333333	-0.5	-0.319697	0.119111
6	-0.489805	-0.211616	0.176443	0.27294																							-0.25	-0.166667	-0.363636	0.222222	-0.5	-0.211616	0.27294
6.5	-0.627979	-0.293434	0.180578	0.141261																							-0.25	-0.333333	-0.272727	-0.111111	-0.5	-0.293434	0.141261
7	-0.512016	-0.341919	0.231372	0.131962																							-0.25	-0.333333	-0.181818	-0.444444	-0.5	-0.341919	0.131962
7.5	-0.554116	-0.389141	0.192601	0.200222																							-0.375	-0.666667	-0.181818	-0.222222	-0.5	-0.389141	0.200222
8	-0.143779	-0.251768	0.699819	0.20026																							-0.375	0	-0.272727	-0.111111	-0.5	-0.251768	0.20026
8.5	-0.58538	-0.368434	0.176925	0.235713																							-0.375	-0.333333	-0.272727	-0.111111	-0.75	-0.368434	0.235713
9	-0.436194	-0.442172	0.209889	0.198217																							-0.375	-0.5	-0.363636	-0.222222	-0.75	-0.442172	0.198217
9.5	-0.65182	-0.32298	0.297063	0.203115																							-0.125	-0.333333	-0.545455	-0.111111	-0.5	-0.32298	0.203115
10	-0.625827	-0.401768	0.148226	0.209102																							-0.125	-0.666667	-0.272727	-0.444444	-0.5	-0.401768	0.209102
10.5	0.156414	-0.478283	1.26744	0.16553																							-0.5	-0.333333	-0.363636	-0.444444	-0.75	-0.478283	0.16553
11	0.33314	-0.479798	0.771734	0.0278923																							-0.5	-0.5	-0.454545	-0.444444	-0.5	-0.479798	0.0278923
11.5	3.02712	-0.321212	1.48396	0.271388																							-0.25	0	-0.272727	-0.333333	-0.75	-0.321212	0.271388
12	5.88504	0.00126263	1.95817	0.229041																							0.125	0.333333	-0.0909091	-0.111111	-0.25	0.00126263	0.229041
12.5	5.61818	0.301515	1.26745	0.148686																							0.25	0.333333	0.0909091	0.333333	0.5	0.301515	0.148686
13	5.45283	0.226263	1.66331	0.210163																							0.25	0.5	-0.0909091	0.222222	0.25	0.226263	0.210163
13.5	5.39686	0.321212	1.34236	0.1056																							0.25	0.5	0.272727	0.333333	0.25	0.321212	0.1056
14	5.43456	0.222727	1.6685	0.146273																							0.25	0.166667	0.363636	0.333333	0	0.222727	0.146273
14.5	5.48608	0.154293	1.78111	0.415437																							0.625	0.333333	0.0909091	0.222222	-0.5	0.154293	0.415437
15	4.95843	0.262626	0.761953	0.148142																							0.25	0.5	0.0909091	0.222222	0.25	0.262626	0.148142
15.5	5.28244	0.12096	1.53682	0.0835072																							0.125	0.166667	0.0909091	0.222222	0	0.12096	0.0835072
16	4.79905	0.159848	1.08274	0.404066																							0.125	0.833333	0.0909091	0	-0.25	0.159848	0.404066
16.5	5.02213	0.22803	1.65822	0.2554																							0.125	0.166667	0.181818	0.666667	0	0.22803	0.2554
17	5.6563	-0.0611111	2.44511	0.144871																							0	-0.166667	0	0.111111	-0.25	-0.0611111	0.144871
17.5	4.94285	-0.147222	2.21486	0.16363																							-0.375	0	0	-0.111111	-0.25	-0.147222	0.16363
18	5.27667	-0.0974747	1.78099	0.148471																							0	-0.166667	-0.181818	0.111111	-0.25	-0.0974747	0.148471
18.5	4.77504	-0.147222	2.24556	0.205912																							-0.125	0	0	-0.111111	-0.5	-0.147222	0.205912
19	4.15669	-0.15	1.64518	0.149071																							0	-0.166667	0	-0.333333	-0.25	-0.15	0.149071
19.5	4.23364	-0.241919	1.83214	0.292855																							0	-0.166667	-0.181818	-0.111111	-0.75	-0.241919	0.292855
20	3.80163	-0.193182	1.46751	0.0983391																							-0.125	-0.166667	-0.0909091	-0.333333	-0.25	-0.193182	0.0983391
20.5	4.06381	-0.212626	1.61162	0.189801																							-0.25	0	-0.0909091	-0.222222	-0.5	-0.212626	0.189801
21	4.02162	-0.239141	1.68955	0.149917																							-0.125	-0.166667	-0.181818	-0.222222	-0.5	-0.239141	0.149917
21.5	4.06392	-0.335101	1.99357	0.0785552																							-0.375	-0.333333	-0.272727	-0.444444	-0.25	-0.335101	0.0785552
22	4.26717	-0.333333	2.36538	0.270031																							-0.25	-0.333333	0	-0.333333	-0.75	-0.333333	0.270031
22.5	3.61345	-0.376768	2.09535	0.149933																							-0.5	-0.166667	-0.272727	-0.444444	-0.5	-0.376768	0.149933
23	3.5384	-0.315404	1.96597	0.280312																							-0.125	-0.166667	-0.0909091	-0.444444	-0.75	-0.315404	0.280312
23.5	3.37599	-0.360101	1.77011	0.272561																							0	-0.333333	-0.272727	-0.444444	-0.75	-0.360101	0.272561
24	3.55202	-0.329545	2.44262	0.123383																							-0.375	-0.166667	-0.272727	-0.333333	-0.5	-0.329545	0.123383
24.5	3.44042	-0.379545	1.88189	0.221427																							-0.375	-0.166667	-0.272727	-0.333333	-0.75	-0.379545	0.221427
25	3.62647	-0.385101	1.91929	0.0896287																							-0.375	-0.333333	-0.272727	-0.444444	-0.5	-0.385101	0.0896287
25.5	2.61073	-0.432576	1.3165	0.0753969																							-0.375	-0.5	-0.454545	-0.333333	-0.5	-0.432576	0.0753969
26	2.94524	-0.432576	1.90934	0.0753969																							-0.375	-0.5	-0.454545	-0.333333	-0.5	-0.432576	0.0753969
26.5	2.83697	-0.521465	2.34077	0.164888																							-0.625	-0.333333	-0.454545	-0.444444	-0.75	-0.521465	0.164888
27	3.19037	-0.488131	1.4076	0.109374																							-0.375	-0.666667	-0.454545	-0.444444	-0.5	-0.488131	0.109374
27.5	2.88865	-0.542424	1.78441	0.0721887																							-0.5	-0.5	-0.545455	-0.666667	-0.5	-0.542424	0.0721887
28	2.35854	-0.590909	1.704	0.187949																							-0.75	-0.666667	-0.454545	-0.333333	-0.75	-0.590909	0.187949
28.5	2.25941	-0.592172	1.37335	0.145865																							-0.625	-0.666667	-0.363636	-0.555556	-0.75	-0.592172	0.145865
29	2.14314	-0.630051	1.13318	0.17773																							-0.375	-0.833333	-0.636364	-0.555556	-0.75	-0.630051	0.17773
29.5	1.26664	-0.582576	0.895583	0.159415																							-0.375	-0.666667	-0.454545	-0.666667	-0.75	-0.582576	0.159415
30	1.89667	-0.553535	1.13329	0.0681912																							-0.5	-0.666667	-0.545455	-0.555556	-0.5	-0.553535	0.0681912
30.5	2.36401	-0.545202	2.555	0.135149																							-0.375	-0.5	-0.545455	-0.555556	-0.75	-0.545202	0.135149
31	1.44681	-0.528535	1.19675	0.105456																							-0.375	-0.666667	-0.545455	-0.555556	-0.5	-0.528535	0.105456
31.5	1.62992	-0.615909	1.23407	0.194875																							-0.375	-0.833333	-0.454545	-0.666667	-0.75	-0.615909	0.194875
32	1.45785	-0.578535	1.28603	0.141612																							-0.375	-0.666667	-0.545455	-0.555556	-0.75	-0.578535	0.141612
32.5	1.38235	-0.681313	1.24437	0.148716																							-0.5	-0.833333	-0.545455	-0.777778	-0.75	-0.681313	0.148716
33	1.54781	-0.625758	1.29609	0.1013																							-0.5	-0.666667	-0.545455	-0.666667	-0.75	-0.625758	0.1013
33.5	1.31445	-0.650758	1.00737	0.0743429																							-0.625	-0.666667	-0.545455	-0.666667	-0.75	-0.650758	0.0743429
34	1.46311	-0.541162	1.63941	0.151108																							-0.375	-0.5	-0.636364	-0.444444	-0.75	-0.541162	0.151108
34.5	1.67857	-0.684091	1.59334	0.111392																							-0.625	-0.833333	-0.545455	-0.666667	-0.75	-0.684091	0.111392
35	1.0507	-0.603535	1.18319	0.102265																							-0.5	-0.666667	-0.545455	-0.555556	-0.75	-0.603535	0.102265
35.5	1.32941	-0.656313	2.1424	0.191242																							-0.375	-0.833333	-0.545455	-0.777778	-0.75	-0.656313	0.191242
36	1.32751	-0.692677	1.23352	0.201569																							-0.625	-0.666667	-0.727273	-0.444444	-1	-0.692677	0.201569
36.5	0.967253	-0.581313	1.29703	0.124871																							-0.5	-0.666667	-0.545455	-0.444444	-0.75	-0.581313	0.124871
37	0.389723	-0.691162	0.634743	0.0688195																							-0.625	-0.666667	-0.636364	-0.777778	-0.75	-0.691162	0.0688195
37.5	0.759217	-0.650758	0.819126	0.0743429																							-0.625	-0.666667	-0.545455	-0.666667	-0.75	-0.650758	0.0743429
38	0.877393	-0.640909	1.2786	0.161383																							-0.5	-0.833333	-0.454545	-0.666667	-0.75	-0.640909	0.161383
38.5	0.812773	-0.705051	1.07198	0.109046																							-0.75	-0.833333	-0.636364	-0.555556	-0.75	-0.705051	0.109046
39	0.495494	-0.650758	0.728377	0.0743429																							-0.625	-0.666667	-0.545455	-0.666667	-0.75	-0.650758	0.0743429
39.5	0.570451	-0.596465	1.15447	0.154272																							-0.5	-0.5	-0.454545	-0.777778	-0.75	-0.596465	0.154272
40	0.136361	-0.607576	0.583161	0.124759																							-0.5	-0.666667	-0.454545	-0.666667	-0.75	-0.607576	0.124759
40.5	0.769388	-0.634091	1.38019	0.129111																							-0.625	-0.833333	-0.545455	-0.666667	-0.5	-0.634091	0.129111
41	0.604425	-0.62298	1.45982	0.165461																							-0.375	-0.666667	-0.545455	-0.777778	-0.75	-0.62298	0.165461
41.5	0.44798	-0.563131	1.13264	0.137389																							-0.5	-0.666667	-0.454545	-0.444444	-0.75	-0.563131	0.137389
42	0.628878	-0.655051	1.06256	0.137012																							-0.5	-0.833333	-0.636364	-0.555556	-0.75	-0.655051	0.137012
42.5	0.114511	-0.578535	0.390611	0.141612																							-0.375	-0.666667	-0.545455	-0.555556	-0.75	-0.578535	0.141612
43	0.156187	-0.681313	0.698219	0.148716																							-0.5	-0.833333	-0.545455	-0.777778	-0.75	-0.681313	0.148716
43.5	0.0238363	-0.700758	0.52571	0.121685																							-0.875	-0.666667	-0.545455	-0.666667	-0.75	-0.700758	0.121685
44	0.0796907	-0.756313	0.792245	0.178522																							-0.625	-0.833333	-0.545455	-0.777778	-1	-0.756313	0.178522
44.5	-0.106023	-0.653535	0.495941	0.100081																							-0.75	-0.666667	-0.545455	-0.555556	-0.75	-0.653535	0.100081
45	0.528067	-0.603535	1.31854	0.102265																							-0.5	-0.666667	-0.545455	-0.555556	-0.75	-0.603535	0.102265
45.5	-0.122689	-0.691162	0.606113	0.0688195																							-0.625	-0.666667	-0.636364	-0.777778	-0.75	-0.691162	0.0688195
46	-0.113137	-0.607828	0.578604	0.170107																							-0.375	-0.5	-0.636364	-0.777778	-0.75	-0.607828	0.170107
46.5	-0.329158	-0.699495	0.393682	0.132642																							-0.5	-0.833333	-0.636364	-0.777778	-0.75	-0.699495	0.132642
47	-0.00896333	-0.712121	0.813815	0.0425188																							-0.75	-0.666667	-0.727273	-0.666667	-0.75	-0.712121	0.0425188
47.5	-0.571596	-0.621717	0.175561	0.0973189																							-0.5	-0.666667	-0.636364	-0.555556	-0.75	-0.621717	0.0973189
48	-0.249214	-0.69798	0.54361	0.0949005																							-0.75	-0.666667	-0.545455	-0.777778	-0.75	-0.69798	0.0949005
48.5	-0.455601	-0.600758	0.224701	0.145762																							-0.375	-0.666667	-0.545455	-0.666667	-0.75	-0.600758	0.145762
49	-0.490394	-0.670455	0.331332	0.175637																							-0.375	-0.833333	-0.727273	-0.666667	-0.75	-0.670455	0.175637
49.5	0.134116	-0.731313	1.44792	0.109326																							-0.75	-0.833333	-0.545455	-0.777778	-0.75	-0.731313	0.109326
50	-0.23787	-0.662121	0.590246	0.0978417																							-0.5	-0.666667	-0.727273	-0.666667	-0.75	-0.662121	0.0978417
50.5	-0.467507	-0.695455	0.351029	0.124528																							-0.5	-0.833333	-0.727273	-0.666667	-0.75	-0.695455	0.124528
51	0.074535	-0.716162	1.27884	0.0610412																							-0.75	-0.666667	-0.636364	-0.777778	-0.75	-0.716162	0.0610412
51.5	-0.446667	-0.727273	0.301478	0.077813																							-0.75	-0.833333	-0.636364	-0.666667	-0.75	-0.727273	0.077813
52	-0.342573	-0.681313	0.594588	0.148716																							-0.5	-0.833333	-0.545455	-0.777778	-0.75	-0.681313	0.148716
52.5	0.015296	-0.724495	0.933691	0.0908319																							-0.625	-0.833333	-0.636364	-0.777778	-0.75	-0.724495	0.0908319
53	-0.295884	-0.687121	0.939958	0.05065																							-0.625	-0.666667	-0.727273	-0.666667	-0.75	-0.687121	0.05065
53.5	-0.621264	-0.662121	0.268334	0.0978417																							-0.5	-0.666667	-0.727273	-0.666667	-0.75	-0.662121	0.0978417
54	-0.559832	-0.767677	0.170543	0.0408358																							-0.75	-0.833333	-0.727273	-0.777778	-0.75	-0.767677	0.0408358
54.5	-0.652608	-0.785859	0.250112	0.0385215																							-0.75	-0.833333	-0.818182	-0.777778	-0.75	-0.785859	0.0385215
55	-0.569665	-0.749495	0.360472	0.0718123																							-0.75	-0.833333	-0.636364	-0.777778	-0.75	-0.749495	0.0718123
55.5	-0.441065	-0.607828	0.663343	0.150236																							-0.625	-0.833333	-0.636364	-0.444444	-0.5	-0.607828	0.150236
56	-0.591313	-0.767677	0.374484	0.181432																							-0.5	-0.833333	-0.727273	-0.777778	-1	-0.767677	0.181432
56.5	-0.574315	-0.687121	0.400326	0.05065																							-0.625	-0.666667	-0.727273	-0.666667	-0.75	-0.687121	0.05065
57	-0.650928	-0.767677	0.258055	0.0408358																							-0.75	-0.833333	-0.727273	-0.777778	-0.75	-0.767677	0.0408358
57.5	-0.588293	-0.582323	0.37439	0.220491																							-0.5	-0.833333	-0.272727	-0.555556	-0.75	-0.582323	0.220491
58	-0.572299	-0.729798	0.399797	0.197148																							-0.75	-0.666667	-0.454545	-0.777778	-1	-0.729798	0.197148
58.5	-0.815659	-0.774495	0.290285	0.154721																							-0.625	-0.833333	-0.636364	-0.777778	-1	-0.774495	0.154721
59	-0.493669	-0.755051	0.462032	0.173233																							-0.75	-0.833333	-0.636364	-0.555556	-1	-0.755051	0.173233
59.5	-0.775995	-0.642677	0.272365	0.121304																							-0.625	-0.666667	-0.727273	-0.444444	-0.75	-0.642677	0.121304
60	-0.866667	-0.749495	0.182574	0.0718123																							-0.75	-0.833333	-0.636364	-0.777778	-0.75	-0.749495	0.0718123

## Sheet: 700mVpp
					700mvpp-1	700mvpp-2	700mvpp-3	700mvpp-4	700mvpp-5	Average	Stdev				Time	700mVpp DF20%	700mVpp DF20% Stdev
					0	0	0	0	0	0	0				0.5	0	0
					0	0	0.6	0.5	0	0.22	0.303315				1	0.22	0.303315
					-0.5	0.333333	-0.6	-0.25	0.5	-0.103333	0.495031				1.5	-0.103333	0.495031
					0	0.333333	1	-0.5	1.5	0.466667	0.794075				2	0.466667	0.794075
					0	0	-0.8	-0.25	0	-0.21	0.347131				2.5	-0.21	0.347131
					0	0.333333	-0.6	0.5	0	0.0466667	0.421373				3	0.0466667	0.421373
					0	0	-0.8	0.25	0	-0.11	0.400625				3.5	-0.11	0.400625
					0	0.333333	-0.2	0	2.5	0.526667	1.11962				4	0.526667	1.11962
					0	0	-0.8	-0.25	0	-0.21	0.347131				4.5	-0.21	0.347131
					0	0.333333	-0.8	0.5	0	0.00666667	0.500222				5	0.00666667	0.500222
					-0.5	-0.333333	-0.6	-0.25	0	-0.336667	0.232857				5.5	-0.336667	0.232857
					0	-0.333333	-0.8	-0.25	-0.5	-0.376667	0.297583				6	-0.376667	0.297583
					0	0	-0.6	-0.75	0	-0.27	0.373497				6.5	-0.27	0.373497
					-0.5	0	-0.8	-0.5	-0.5	-0.46	0.288097				7	-0.46	0.288097
					-0.5	-0.333333	-0.8	0.75	-0.5	-0.276667	0.598099				7.5	-0.276667	0.598099
					0	0.333333	-0.8	-0.5	-0.5	-0.293333	0.453015				8	-0.293333	0.453015
					-0.5	-0.333333	-0.6	-0.5	-0.5	-0.486667	0.0960324				8.5	-0.486667	0.0960324
					-0.5	-0.333333	-0.8	-0.25	0	-0.376667	0.297583				9	-0.376667	0.297583
					-0.5	-0.333333	-0.8	-0.5	-0.5	-0.526667	0.168984				9.5	-0.526667	0.168984
					-0.5	0	-0.8	-0.5	-0.5	-0.46	0.288097				10	-0.46	0.288097
					-0.5	0	-0.8	0	-0.5	-0.36	0.350714				10.5	-0.36	0.350714
					-0.5	0	-0.8	-0.25	-0.5	-0.41	0.300832				11	-0.41	0.300832
					2.5	1.66667	1.4	4.25	5	2.96333	1.59245				11.5	2.96333	1.59245
					3.5	2.66667	1.6	5	10.5	4.65333	3.49655				12	4.65333	3.49655
					8.5	4.66667	3.8	3.75	10	6.14333	2.90807				12.5	6.14333	2.90807
					8	4.66667	5.8	6	11.5	7.19333	2.69015				13	7.19333	2.69015
					7.5	5	2.6	4.5	13	6.52	4.02206				13.5	6.52	4.02206
					7	5	2.8	4.25	14.5	6.71	4.61064				14	6.71	4.61064
					9	6	2.8	6.75	13	7.51	3.78821				14.5	7.51	3.78821
					6	4.66667	5.6	4.5	11.5	6.45333	2.89008				15	6.45333	2.89008
					8.5	5	3.4	5.75	11	6.73	3.01695				15.5	6.73	3.01695
					5	4.33333	3.8	3.5	10	5.32667	2.67399				16	5.32667	2.67399
					7	4.33333	2.6	7.25	8.5	5.93667	2.40469				16.5	5.93667	2.40469
					7	4	2.6	3.25	10	5.37	3.0878				17	5.37	3.0878
					8	4.33333	3.2	7	7	5.90667	2.03557				17.5	5.90667	2.03557
					6	3.66667	3.8	5.25	12.5	6.24333	3.63321				18	6.24333	3.63321
					6.5	3.33333	3.6	4.75	6	4.83667	1.40685				18.5	4.83667	1.40685
					4.5	3.66667	3.4	3.25	7	4.36333	1.55109				19	4.36333	1.55109
					6	2.66667	2.4	4.75	6.5	4.46333	1.87596				19.5	4.46333	1.87596
					4.5	3.33333	1.2	4.5	5.5	3.80667	1.64678				20	3.80667	1.64678
					6.5	3	2.4	3.25	5	4.03	1.68582				20.5	4.03	1.68582
					6	3	2.6	6.75	7	5.07	2.10938				21	5.07	2.10938
					3	2	2	3.75	5	3.15	1.26984				21.5	3.15	1.26984
					3.5	3	2.4	4.25	6	3.83	1.38996				22	3.83	1.38996
					5	2.66667	4	2.75	5	3.88333	1.14807				22.5	3.88333	1.14807
					4	2.66667	1.4	3.25	4	3.06333	1.08554				23	3.06333	1.08554
					3.5	2	1.2	3	6.5	3.24	2.02805				23.5	3.24	2.02805
					4.5	2	1.4	4.5	3.5	3.18	1.42724				24	3.18	1.42724
					2	1.66667	1.2	2.75	6.5	2.82333	2.13156				24.5	2.82333	2.13156
					1	1	1.4	3.25	5.5	2.43	1.95243				25	2.43	1.95243
					3.5	1.66667	1.6	2	3.5	2.45333	0.967414				25.5	2.45333	0.967414
					3	2	0.8	2.75	6	2.91	1.92756				26	2.91	1.92756
					1.5	1.33333	1.2	5	5.5	2.90667	2.14908				26.5	2.90667	2.14908
					3	1.33333	2.6	2.25	3	2.43667	0.691657				27	2.43667	0.691657
					1	1	1	2.5	3	1.7	0.974679				27.5	1.7	0.974679
					4	1	1	1	3	2	1.41421				28	2	1.41421
					1	1	1.4	1	2	1.28	0.438178				28.5	1.28	0.438178
					1.5	1	1.6	1.5	4	1.92	1.18617				29	1.92	1.18617
					1	1	0.4	2.5	4	1.78	1.46356				29.5	1.78	1.46356
					0.5	1	1.2	1	4	1.54	1.39929				30	1.54	1.39929
					3	0.666667	0.6	4.75	2	2.20333	1.73879				30.5	2.20333	1.73879
					2	0.666667	-0.4	0.5	4	1.35333	1.71004				31	1.35333	1.71004
					2	0.666667	-0.2	1.5	1.5	1.09333	0.867115				31.5	1.09333	0.867115
					3	1	0.4	1.25	1.5	1.43	0.967988				32	1.43	0.967988
					0.5	0.666667	0	1.25	2.5	0.983333	0.958152				32.5	0.983333	0.958152
					2	0.666667	-0.8	2	0.5	0.873333	1.17483				33	0.873333	1.17483
					0	0.333333	-0.6	1.75	2	0.696667	1.12992				33.5	0.696667	1.12992
					0	0.666667	-0.8	2.75	6	1.72333	2.72936				34	1.72333	2.72936
					1	0.666667	-0.6	0	1.5	0.513333	0.827177				34.5	0.513333	0.827177
					0.5	0	1.4	0.25	1	0.63	0.56745				35	0.63	0.56745
					0.5	0.333333	-0.6	0.25	3.5	0.796667	1.57005				35.5	0.796667	1.57005
					0	0.333333	-0.2	0.5	5.5	1.22667	2.40456				36	1.22667	2.40456
					2	0.666667	-0.4	1	2.5	1.15333	1.14057				36.5	1.15333	1.14057
					0	0	0.2	-0.75	1.5	0.19	0.817313				37	0.19	0.817313
					0	0	-0.6	0.5	3.5	0.68	1.62388				37.5	0.68	1.62388
					0	0.333333	-0.4	0.5	3	0.686667	1.33824				38	0.686667	1.33824
					0	0	-0.8	0.25	1	0.09	0.644593				38.5	0.09	0.644593
					0	0	-0.6	1.75	0	0.23	0.888538				39	0.23	0.888538
					0	0	-0.8	0.25	-0.5	-0.21	0.427785				39.5	-0.21	0.427785
					0	0	-0.6	0.75	0	0.03	0.479062				40	0.03	0.479062
					0	0	-0.6	0.25	0	-0.07	0.315436				40.5	-0.07	0.315436
					0	0	-0.8	1.25	7.5	1.59	3.38423				41	1.59	3.38423
					0	-0.333333	-0.6	0.25	0	-0.136667	0.331746				41.5	-0.136667	0.331746
					0	0	-0.4	2.25	2.5	0.87	1.38636				42	0.87	1.38636
					-0.5	-0.333333	-0.4	-0.25	-0.5	-0.396667	0.108269				42.5	-0.396667	0.108269
					0	0	-0.4	-0.25	-0.5	-0.23	0.228035				43	-0.23	0.228035
					0	0	-0.8	-0.25	0	-0.21	0.347131				43.5	-0.21	0.347131
					0	-0.333333	0	-0.5	0	-0.166667	0.235702				44	-0.166667	0.235702
					0	-0.333333	-0.8	1	0	-0.0266667	0.660976				44.5	-0.0266667	0.660976
					0	-0.666667	-1	-0.5	-0.5	-0.533333	0.361325				45	-0.533333	0.361325
					0	0	-0.8	-0.25	0.5	-0.11	0.472229				45.5	-0.11	0.472229
					-0.5	0.333333	-0.8	0.25	-0.5	-0.243333	0.50437				46	-0.243333	0.50437
					-0.5	0.333333	-1	0.75	3.5	0.616667	1.75159				46.5	0.616667	1.75159
					0	-0.666667	-1	1.25	-0.5	-0.183333	0.878762				47	-0.183333	0.878762
					0	-0.333333	-1	0.25	-0.5	-0.316667	0.480162				47.5	-0.316667	0.480162
					-0.5	-0.333333	-0.8	-0.25	0.5	-0.276667	0.482413				48	-0.276667	0.482413
					-0.5	-0.333333	-0.8	-0.5	-1	-0.626667	0.268121				48.5	-0.626667	0.268121
					-0.5	-0.333333	-0.8	0.75	-0.5	-0.276667	0.598099				49	-0.276667	0.598099
					-0.5	-0.333333	-0.8	0.25	-1	-0.476667	0.481548				49.5	-0.476667	0.481548
					-0.5	-0.333333	-1	0.25	-0.5	-0.416667	0.448764				50	-0.416667	0.448764
					0	-0.333333	-1	-0.5	-0.5	-0.466667	0.361325				50.5	-0.466667	0.361325
					-0.5	0	-1	-0.75	-0.5	-0.55	0.37081				51	-0.55	0.37081
					0	-0.666667	-1	-0.75	-0.5	-0.583333	0.372678				51.5	-0.583333	0.372678
					-0.5	-0.666667	-1	0	-0.5	-0.533333	0.361325				52	-0.533333	0.361325
					1.5	-0.666667	-1	-0.75	-1	-0.383333	1.06328				52.5	-0.383333	1.06328
					-0.5	-0.333333	-1	-0.75	-0.5	-0.616667	0.260875				53	-0.616667	0.260875
					-0.5	-0.666667	-1	-0.75	-0.5	-0.683333	0.207498				53.5	-0.683333	0.207498
					-0.5	-0.333333	-1	-0.25	-0.5	-0.516667	0.291071				54	-0.516667	0.291071
					-0.5	-0.333333	-1	-0.5	-0.5	-0.566667	0.252763				54.5	-0.566667	0.252763
					-0.5	-0.333333	-0.8	-0.75	-0.5	-0.576667	0.194222				55	-0.576667	0.194222
					-0.5	-0.333333	-1	-0.75	-0.5	-0.616667	0.260875				55.5	-0.616667	0.260875
					-0.5	-1	-0.8	-0.75	-1	-0.81	0.207364				56	-0.81	0.207364
					-0.5	-0.666667	-1	-0.5	-1	-0.733333	0.252763				56.5	-0.733333	0.252763
					-0.5	-0.333333	-1	-0.5	-1	-0.666667	0.311805				57	-0.666667	0.311805
					-0.5	-0.333333	-0.8	-0.75	-0.5	-0.576667	0.194222				57.5	-0.576667	0.194222
					-0.5	-0.666667	-1	0	-1	-0.633333	0.414997				58	-0.633333	0.414997
					-0.5	-0.666667	-1	-0.75	-1	-0.783333	0.217307				58.5	-0.783333	0.217307
					-0.5	-0.666667	-1	-0.75	-0.5	-0.683333	0.207498				59	-0.683333	0.207498
					-0.5	-0.333333	-1	-0.75	-1	-0.716667	0.298142				59.5	-0.716667	0.298142
					-0.5	-0.333333	-1	-0.75	-1	-0.716667	0.298142				60	-0.716667	0.298142
					9	6	5.8	7.25	14.5						60.5
															61
															61.5
															62
															62.5
															63
															63.5
															64
															64.5
															65
															65.5
															66
															66.5
															67
															67.5
															68
															68.5
															69
															69.5
															70
															70.5
															71
															71.5
															72
															72.5
															73
															73.5
															74
															74.5
															75
															75.5
															76
															76.5
															77
															77.5
															78
															78.5
															79
															79.5
															80
															80.5
															81
															81.5
															82
															82.5
															83
															83.5
															84
															84.5
															85
															85.5
															86
															86.5
															87
															87.5
															88
															88.5
															89
															89.5
															90
															90.5
															91
															91.5
															92
															92.5
															93
															93.5
															94
															94.5
															95
															95.5
															96
															96.5
															97
															97.5
															98
															98.5
															99
															99.5
