# Supplementary material for: ASIC1a is required for neuronal activation via low-intensity ultrasound stimulation in mouse brain
Source: eLife journal article supplement (doi:10.7554/elife.61660), 2021-09-27
Supplement: supp [file elife_poa_e61660_Figure_6_source_data_1.xlsx]

## Sheet: DCX quantification (Fig 6)
There were two batches of mice as highlighted in either blue or yellow
DCX analysis
Wildtype Control			Wildtype US			ASIC1a-/- Control			ASIC1a-/- US
mouse No.	DCX cell Counts	Dentate gyrus length(mm)	mouse No.	DCX cell Counts	Dentate gyrus length(mm)	mouse No.	DCX cell Counts	Dentate gyrus length(mm)	mouse No.	DCX cell Counts	Dentate gyrus length(mm)
#430	0	0	#720	43	2.19907	#707	66	2.20933	#692	52	2.28952
	31	2.35924		81	2.21915		69	2.17343		52	2.26518
	34	2.35815		67	2.2894		88	2.33094		46	2.28335
	36	2.39936		68	2.16219		102	2.32912		40	2.15824
	44	2.40938		58	2.20596		141	2.34334		50	2.2969
	46	2.3909		69	2.2829		159	2.31465		41	2.30914
	65	2.36145		63	2.17451		162	2.33514	sum	281	13.6023
	58	2.32645		45	2.09951		103	2.33514	#706	96	2.42163
	0	0		35	2.09951		74	2.33514		116	2.33342
sum	314	16.6049		27	2.09951	sum	964	20.7062		142	2.50789
#431	51	2.38478	sum	556	21.8317	#703	111	2.21288		143	2.52929
	45	2.41918	#433	64	2.48882		154	2.2947		168	2.39949
	48	2.40536		68	2.40601		138	2.25671		128	2.42545
	54	2.38642		60	2.45422		109	2.19184		14	2.42545
	48	2.40332		68	2.46781		101	2.24857	sum	807	17.0426
	48	2.41722		67	2.44374		77	2.20725	#705	127	2.5166
	37	2.37995		30	2.46368	sum	690	13.412		145	2.46155
sum	331	16.7962	sum	357	14.7243	#704	75	2.01406		140	2.37323
#432	53	2.30914	#690	54	2.45905		82	2.06345		122	2.36258
	62	2.46368		69	2.35759		98	2.04686		133	2.34909
	75	2.40536		61	2.45984		92	2.01812		116	2.40268
	72	2.45422		63	2.50892		104	2.04261	sum	783	14.4657
	61	2.46781		68	2.40451		92	1.98026	#708	6	2.00059
	59	2.41722		57	2.41671	sum	543	12.1654		64	2.00059
	42	2.37995		25	2.2307					112	2.00059
	5	2.38478	sum	397	16.8373					103	2.00856
sum	429	19.2822	#971	107	1.87623					91	1.93199
#974	100	1.8757		150	1.82657					87	1.99806
	121	2.0068		163	1.7974					82	2.00922
	123	1.82183		142	1.75041				sum	545	13.9496
	130	1.95532		137	1.78137
	145	1.96048		135	1.92917
	162	2.08367		107	1.8159
	153	1.86708		101	1.84564
	139	1.91454	sum	1042	14.6227
	91	1.90309	#972	110	2.04084
	0	1.90309		125	2.08904
sum	1164	19.2916		133	2.02567
				141	1.97577
				121	2.02886
				87	1.9786
			sum	717	12.1388
Total cell count devided by the length of dentate gyrus (count/mm)
mouse No.	Wildtype Control	mouse No.	Wildtype US	mouse No.	ASIC1a-/- Control	mouse No.	ASIC1a-/- US
#430	18.9101	#720	25.4676	#707	46.5561	#692	20.6582
#431	19.7068	#433	24.2457	#703	51.4466	#706	47.3519
#432	22.2485	#690	23.5786	#704	44.635	#705	54.1279
#974	60.3371	#971	71.2591			#708	39.0692
		#972	59.0669
Wildtype Control
(Batch blue average value)	20.2885
(Batch yellow average value )	60.3371
Data normalization using wildtype control average value of its batch
mouse No.	Wildtype Control	mouse No.	Wildtype US	mouse No.	ASIC1a-/- Control	mouse No.	ASIC1a-/- US
#430	0.932059	#720	1.25527	#707	0.771599	#692	1.01822
#431	0.971331	#433	1.19505	#703	0.852653	#706	0.784788
#432	1.09661	#690	1.16217	#704	0.739759	#705	0.897091
#974	1	#971	1.18102			#708	0.647515
		#972	0.978947
average	1	average	1.15449	average	0.788004	average	0.836905
Stdev	0.0701699	Stdev	0.104139	Stdev	0.0582072	Stdev	0.158202
